# Supplementary material for: Differentially expressed genes related to plant height and yield in two alfalfa cultivars based on RNA-seq
Source: PeerJ. 2022 Oct 10;10:e14096. doi: 10.7717/peerj.14096 (PMC9558622; doi:10.7717/peerj.14096)
Supplement: Supplemental Information 5 [file peerj-10-14096-s005.docx]

|  |  | **WL 712** | **WL525HQ** | **Victoria** | **Knight 2** | **Aohan** |
| --- | --- | --- | --- | --- | --- | --- |
| **Plant Height (cm)** | **August, 2019** | 72.82 ± 1.3398 a | 69.22 ± 1.3355 b | 63.50 ± 0.8968 c | 41.89 ± 0.3958 d | 41.02 ± 0.4007 d |
| **Mid-October, 2019** | 50.17 ± 0.3098 a | 49.65 ± 0.3060 ab | 49.20 ± 1.0536 b | 28.17 ± 0.5816 c | 28.23 ± 0.1737 c |
| **June, 2020** | 81.28 ± 0.9491 a | 78.21 ± 1.3904 b | 69.37 ± 0.8403 c | 43.21 ± 0.4532 d | 42.09 ± 0.4693 d |
| **August, 2020** | 79.41 ± 0.2840 a | 75.64 ± 1.1545 b | 68.28 ± 1.1491 c | 42.30 ± 0.4440 d | 41.60 ±0.5888 d |
| **Plant Weight (g)** | **August, 2019** | 262.6 ± 4.3935 a | 258.7 ± 5.0771 a | 258.8 ± 2.7770 a | 152.6 ± 1.8714 b | 149.2 ± 1.3198 b |
| **Mid-October, 2019** | 235.6 ± 1.2247 a | 232.4 ± 2.5677 b | 232.1 ± 2.1859 b | 128.5 ± 0.7085 c | 127.4 ± 0.8106 c |
| **June, 2020** | 329.0 ± 1.4832 a | 325.4 ± 3.6718 a | 331.2 ± 2.9215 b | 212.1 ± 0.9203 c | 211.8 ± 2.1970 c |
| **August, 2020** | 280.4 ± 1.4832 a | 266.6 ± 3.3126 b | 264.1 ± 1.6649 b | 152.5 ± 2.9609 c | 152.1 ± 2.1279 c |
| **Lenght of Internodde (cm)** | **August, 2019** | 7.49 ± 0.0192 a | 7.48 ± 0.0114 a | 7.50 ± 0.0158 a | 4.41 ± 0.0417 b | 4.32 ± 0.0422 c |
| **Mid-October, 2019** | 5.43 ± 0.0156 a | 5.27 ± 0.0167 b | 5.24 ± 0.0224 b | 2.97 ± 0.0612 c | 2.97 ± 0.0183 c |
| **June, 2020** | 8.13 ± 0.0559 a | 8.05 **±** 0.0705 a | 7.31 ± 0.0884 b | 4.50 ± 0.0472 c | 4.53 ± 0.0505 c |
| **August, 2020** | 7.87 ± 0.0678 a | 7.59 ± 0.3489 b | 7.18 ± 0.1126 c | 4.65 ± 0.0476 d | 4.60 ± 0.1641 d |
| **Stem Diameter (mm)** | **August, 2019** | 3.62 ± 0.2451 a | 3.60 ± 0.2223 a | 3.47 ± 0.0680 a | 2.05 ± 0.0277 b | 1.90 ± 0.0691 b |
| **Mid-October, 2019** | 2.63 ± 0.0339 a | 2.62 ± 0.0192 a | 2.60 ± 0.0228 a | 1.25 ± 0.0464 b | 1.21 ± 0.0597 b |
| **June, 2020** | 3.85 ± 0.0259 a | 3.62 ± 0.0167 b | 3.62 ± 0.0803 b | 2.28 ± 0.0230 c | 2.27 ± 0.0277 c |
| **August, 2020** | 3.83 ± 0.0295 a | 3.60 ± 0.0619 b | 3.53 ± 0.2356 b | 2.16 ± 0.0737 c | 2.00 ± 0.0432 c |

**Table S3 Growth index of different cutting times**

Different letters indicate significant difference at *P <* 0.05 among the two hormones as determined by Student’s test.
