# Supplementary material for: Differentially expressed genes related to plant height and yield in two alfalfa cultivars based on RNA-seq
Source: PeerJ. 2022 Oct 10;10:e14096. doi: 10.7717/peerj.14096 (PMC9558622; doi:10.7717/peerj.14096)
Supplement: Supplemental Information 7 [file peerj-10-14096-s007.xlsx]

## Sheet: Sheet1
Table S5 Gene ontology function classification
Category	GOID	Description	padj	Count	Up	Down
BP	GO:0006414	translational elongation	0.00854561	41	19	22
BP	GO:0043244	regulation of protein complex disassembly	0.0403097	8	4	4
BP	GO:0006417	regulation of translation	0.0403097	7	4	3
BP	GO:0006448	regulation of translational elongation	0.0403097	7	4	3
BP	GO:0006449	regulation of translational termination	0.0403097	7	4	3
BP	GO:0006452	translational frameshifting	0.0403097	7	4	3
BP	GO:0010608	posttranscriptional regulation of gene expression	0.0403097	7	4	3
BP	GO:0032270	positive regulation of cellular protein metabolic process	0.0403097	7	4	3
BP	GO:0034248	regulation of cellular amide metabolic process	0.0403097	7	4	3
BP	GO:0034250	positive regulation of cellular amide metabolic process	0.0403097	7	4	3
BP	GO:0043243	positive regulation of protein complex disassembly	0.0403097	7	4	3
BP	GO:0045727	positive regulation of translation	0.0403097	7	4	3
BP	GO:0045901	positive regulation of translational elongation	0.0403097	7	4	3
BP	GO:0045905	positive regulation of translational termination	0.0403097	7	4	3
BP	GO:0051247	positive regulation of protein metabolic process	0.0403097	7	4	3
CC	GO:0030126	COPI vesicle coat	0.0243949	9	6	3
CC	GO:0030137	COPI-coated vesicle	0.0243949	9	6	3
CC	GO:0030663	COPI-coated vesicle membrane	0.0243949	9	6	3
CC	GO:0098588	bounding membrane of organelle	0.0400272	57	33	24
CC	GO:1905368	peptidase complex	0.0400272	44	30	14
CC	GO:0098805	whole membrane	0.0400272	49	27	22
CC	GO:0033177	proton-transporting two-sector ATPase complex, proton-transporting domain	0.0400272	20	15	5
CC	GO:0005839	proteasome core complex	0.0243949	37	24	13
CC	GO:0005794	Golgi apparatus	0.0408815	36	23	13
CC	GO:0044431	Golgi apparatus part	0.0408815	36	23	13
MF	GO:0003746	translation elongation factor activity	0.00240798	41	19	22
MF	GO:0008135	translation factor activity, RNA binding	0.00634507	86	47	39
MF	GO:0016881	acid-amino acid ligase activity	0.00764559	12	6	6
MF	GO:0008194	UDP-glycosyltransferase activity	0.0149597	99	62	37
MF	GO:0004298	threonine-type endopeptidase activity	0.0337182	37	24	13
MF	GO:0070003	threonine-type peptidase activity	0.0337182	37	24	13
MF	GO:0046982	protein heterodimerization activity	0.0337182	114	88	26
MF	GO:0016879	ligase activity, forming carbon-nitrogen bonds	0.049083	35	15	20
MF	GO:0008375	acetylglucosaminyltransferase activity	0.0369129	35	21	14
MF	GO:0016638	oxidoreductase activity, acting on the CH-NH2 group of donors	0.00240788	12	4	8
