# Supplementary material for: Differentially expressed genes related to plant height and yield in two alfalfa cultivars based on RNA-seq
Source: PeerJ. 2022 Oct 10;10:e14096. doi: 10.7717/peerj.14096 (PMC9558622; doi:10.7717/peerj.14096)
Supplement: Supplemental Information 8 [file peerj-10-14096-s008.xlsx]

## Sheet: Sheet1
Table S6 KEGG classification of DEGs
KEGGID	Description	GeneRatio (%)	Count	Up	Down
ath01200	Carbon metabolism	7.77946	103	53	50
ath00190	Oxidative phosphorylation	3.77644	50	31	19
ath00010	Glycolysis / Gluconeogenesis	3.77644	50	27	23
ath01230	Biosynthesis of amino acids	6.11782	81	48	33
ath03010	Ribosome	7.25076	96	61	35
ath03040	Spliceosome	4.90937	65	34	31
ath04626	Plant-pathogen interaction	3.92749	52	21	31
ath03013	RNA transport	4.07855	54	30	24
ath04141	Protein processing in endoplasmic reticulum	3.92749	52	23	29
ath04144	Endocytosis	3.17221	42	27	15
ath04075	Plant hormone signal transduction	3.32326	44	24	20
ath00500	Starch and sucrose metabolism	2.79456	37	20	17
ath04120	Ubiquitin mediated proteolysis	2.6435	35	19	16
ath03015	mRNA surveillance pathway	2.34139	31	15	16
ath03018	RNA degradation	2.6435	35	12	23
ath00940	Phenylpropanoid biosynthesis	2.49245	33	13	20
ath00520	Amino sugar and nucleotide sugar metabolism	2.6435	35	13	22
ath00230	Purine metabolism	2.6435	35	13	22
ath00480	Glutathione metabolism	2.56798	34	15	19
ath00620	Pyruvate metabolism	2.49245	33	11	22
ath00270	Cysteine and methionine metabolism	2.56798	34	24	10
ath00240	Pyrimidine metabolism	1.88822	25	16	9
ath03050	Proteasome	1.81269	24	16	8
ath00710	Carbon fixation in photosynthetic organisms	1.96375	26	13	13
ath00630	Glyoxylate and dicarboxylate metabolism	2.19033	29	13	16
ath00020	Citrate cycle (TCA cycle)	1.66163	22	14	8
ath01212	Fatty acid metabolism	2.03927	27	15	12
ath00410	beta-Alanine metabolism	1.73716	23	10	13
ath00260	Glycine, serine and threonine metabolism	1.66163	22	12	10
ath00860	Porphyrin and chlorophyll metabolism	1.51057	20	9	11
ath00561	Glycerolipid metabolism	1.88822	25	12	13
ath04145	Phagosome	1.88822	25	17	8
ath03420	Nucleotide excision repair	1.51057	20	9	11
ath04146	Peroxisome	2.1148	28	10	18
ath00564	Glycerophospholipid metabolism	2.1148	28	14	14
ath03008	Ribosome biogenesis in eukaryotes	1.66163	22	10	12
ath04016	MAPK signaling pathway - plant	2.19033	29	17	12
