# Supplementary material for: Differentially expressed genes related to plant height and yield in two alfalfa cultivars based on RNA-seq
Source: PeerJ. 2022 Oct 10;10:e14096. doi: 10.7717/peerj.14096 (PMC9558622; doi:10.7717/peerj.14096)
Supplement: Supplemental Information 9 [file peerj-10-14096-s009.xlsx]

## Sheet: Sheet1
Table S7 The KEGG enrichment of several DEGs associated with develoment
Metabolic pathway	Gene_ID	Hormone	Gene_name	KEGG_ID	Description	AJ_count	WJ_count	AJ_fpkm	WJ_fpkm	WJvsAJ_log2FC	WJvsAJ_padj	Gene_description
Plant hormone signal transduction(ath04075)	MS.gene003525	Auxin	LAX5	ath00380	Plant hormone signal transduction	56.3333	368.333	4.90266	35.4899	2.85535	7.7921e-17	- && Q8L883.1 RecName: Full=Auxin transporter-like protein 5; AltName: Full=AUX1-like protein 5; AltName: Full=MtLAX5 && PF01490:Transmembrane amino acid transporter protein
	MS.gene008982		IAA9	ath00380	Plant hormone signal transduction	114.667	619.667	13.212	79.0628	2.58067	5.88209e-19	- && Q38827.1 RecName: Full=Auxin-responsive protein IAA9; AltName: Full=Indoleacetic acid-induced protein 9 && PF02309:AUX/IAA family
	MS.gene79533		IAA6	ath00380	Plant hormone signal transduction	4	63.3333	0.623205	10.8983	4.13412	1.62035e-07	- && P49680.1 RecName: Full=Auxin-induced protein IAA6 && PF02309:AUX/IAA family
	MS.gene07404		AUX22B	ath00380	Plant hormone signal transduction	43.3333	0	4.4997	0	-7.74013	3.23571e-08	- && P32294.1 RecName: Full=Auxin-induced protein 22B; AltName: Full=Indole-3-acetic acid-induced protein ARG4 && PF02309:AUX/IAA family
	MS.gene003632		SAUR50	ath00380	Plant hormone signal transduction	6.33333	59	2.51178	26.0419	3.3705	4.02805e-08	- && O65695.1 RecName: Full=Auxin-responsive protein SAUR50; AltName: Full=Protein SMALL AUXIN UP RNA 50 && PF02519:Auxin responsive protein
	MS.gene067310		SAUR32	ath00380	Plant hormone signal transduction	1.66667	48.3333	0.664261	20.9182	4.98749	4.58934e-07	- && Q9ZUZ3.1 RecName: Full=Auxin-responsive protein SAUR32; AltName: Full=Protein ABOLISHED APICAL HOOK MAINTENANCE 1; AltName: Full=Protein SMALL AUXIN UP RNA 32 && PF02519:Auxin responsive protein
	MS.gene20109		SAUR36	ath00380	Plant hormone signal transduction	0	97.3333	0	30.2909	9.18907	6.68535e-12	- && O22150.1 RecName: Full=Auxin-responsive protein SAUR36; AltName: Full=Protein RESPONSE TO AUXINS AND GIBBERELLINS 1; AltName: Full=Protein SENESCENCE-ASSOCIATED GENE 201; AltName: Full=Protein SMALL AUXIN UP RNA 36 && PF02519:Auxin responsive protein
	MS.gene057776		SAUR24	ath00380	Plant hormone signal transduction	0.333333	5.33333	0.151299	2.62746	4.04527	0.0443119	- && Q9FK62.1 RecName: Full=Auxin-responsive protein SAUR24; AltName: Full=Protein SMALL AUXIN UP RNA 24 && PF02519:Auxin responsive protein
	MS.gene052742		LAX4	ath00380	Plant hormone signal transduction	21	1.66667	2.75376	0.236803	-3.52437	0.00207462	- && Q8L884.1 RecName: Full=Auxin transporter-like protein 4; AltName: Full=AUX1-like protein 4; AltName: Full=MtLAX4 && PF01490:Transmembrane amino acid transporter protein
	MS.gene32212		TIR1	ath00380	Plant hormone signal transduction	312.333	149.333	22.6597	12.0455	-0.912432	0.0255648	- && Q570C0.2 RecName: Full=Protein TRANSPORT INHIBITOR RESPONSE 1; AltName: Full=Weak ethylene-insensitive protein 1 && -
	MS.gene89092		IAA17	ath00380	Plant hormone signal transduction	29	2.33333	5.79564	0.506373	-3.50864	0.0140099	- && P93830.2 RecName: Full=Auxin-responsive protein IAA17; AltName: Full=Auxin response 3; AltName: Full=Indoleacetic acid-induced protein 17 && PF02309:AUX/IAA family
	MS.gene24179		ARF5	ath00380	Plant hormone signal transduction	26.3333	0.333333	1.29703	0.0178336	-6.05604	4.08679e-05	- && P93024.3 RecName: Full=Auxin response factor 5; AltName: Full=Auxin-responsive protein IAA24; AltName: Full=Transcription factor MONOPTEROS && PF02362:B3 DNA binding domain|PF02309:AUX/IAA family|PF06507:Auxin response factor
	MS.gene95748		GH3.5	ath00380	Plant hormone signal transduction	100	4.33333	7.27457	0.349396	-4.38361	7.45814e-14	- && Q6I581.1 RecName: Full=Jasmonic acid-amido synthetase JAR1; AltName: Full=Auxin-responsive GH3-like protein 5; Short=OsGH3-5; AltName: Full=Indole-3-acetic acid-amido synthetase GH3.5; AltName: Full=Jasmonate-amino acid synthetase JAR1; AltName: Full
	MS.gene45855		SAUR36	ath00380	Plant hormone signal transduction	100	4.33333	7.27457	0.349396	-4.38361	7.45814e-14	- && O22150.1 RecName: Full=Auxin-responsive protein SAUR36; AltName: Full=Protein RESPONSE TO AUXINS AND GIBBERELLINS 1; AltName: Full=Protein SENESCENCE-ASSOCIATED GENE 201; AltName: Full=Protein SMALL AUXIN UP RNA 36 && PF02519:Auxin responsive protein
	MS.gene008246	Gibberellin	GID2	ath04075	Plant hormone signal transduction	124.333	724.667	9.85985	63.2422	2.68132	3.23462e-22	- && Q7Y1B6.1 RecName: Full=DELLA protein GAI; AltName: Full=Gibberellic acid-insensitive mutant protein && PF12041:Transcriptional regulator DELLA protein N terminal|PF03514:GRAS domain family
	MS.gene015125		GAI	ath04075	Plant hormone signal transduction	191.333	83	45.6502	21.8984	-1.06053	0.00545117	- && Q9STX3.1 RecName: Full=F-box protein GID2; AltName: Full=Protein SLEEPY 1 && -
	MS.gene019150		PIF4	ath04075	Plant hormone signal transduction	194.667	0.333333	24.4891	0.0453734	-8.94491	1.25677e-11	- && Q8W2F3.1 RecName: Full=Transcription factor PIF4; AltName: Full=Basic helix-loop-helix protein 9; Short=AtbHLH9; Short=bHLH 9; AltName: Full=Phytochrome-interacting factor 4; AltName: Full=Short under red-light 2; AltName: Full=Transcription factor E
	MS.gene011637	Brassinosteroid	BSK1	ath04075	Plant hormone signal transduction	136.667	13	11.6628	1.21682	-3.25629	9.18078e-14	- && Q944A7.1 RecName: Full=Probable serine/threonine-protein kinase At4g35230 && PF07714:Protein tyrosine kinase
	MS.gene023870		BSK8	ath04075	Plant hormone signal transduction	242.333	90.3333	20.9609	8.65305	-1.27739	0.000152046	- && Q9FHD7.1 RecName: Full=Probable serine/threonine-protein kinase At5g41260 && -
	MS.gene029573		CYCD3-3	ath04075	Plant hormone signal transduction	60	16	7.84108	2.30433	-1.76542	0.00335226	- && Q9SN11.1 RecName: Full=Cyclin-D3-3; AltName: Full=G1/S-specific cyclin-D3-3; Short=CycD3;3 && PF02984:Cyclin, C-terminal domain|PF00134:Cyclin, N-terminal domain
	novel.8847	Jasmonic acid	COI1A	ath04075	Plant hormone signal transduction	5.33333	45.3333	1.27413	11.8891	3.22438	2.44768e-07	- && Q6Y9P5.1 RecName: Full=Coronatine-insensitive protein homolog 1a; Short=OsCOI1a >A2WX30.1 RecName: Full=Coronatine-insensitive protein homolog 1a && -
	MS.gene74585		TIFY6B	ath04075	Plant hormone signal transduction	0	5	0.6796	0	4.90707	0.0225048	- && Q9LVI4.1 RecName: Full=Protein TIFY 6B; AltName: Full=Jasmonate ZIM domain-containing protein 3; AltName: Full=Protein JASMONATE INSENSITIVE 3 && PF09425:Divergent CCT motif|PF06200:tify domain
	MS.gene074449		TIFY11B	ath04075	Plant hormone signal transduction	153.333	11.3333	27.7422	2.24776	-3.62383	1.65408e-07	- && Q9C9E3.1 RecName: Full=Protein TIFY 11B; AltName: Full=Jasmonate ZIM domain-containing protein 6 && PF06200:tify domain|PF09425:Divergent CCT motif
	MS.gene057422		TIFY10B	ath04075	Plant hormone signal transduction	857.333	207	145.241	38.7502	-1.90618	0.00217218	- && Q9S7M2.1 RecName: Full=Protein TIFY 10B; AltName: Full=Jasmonate ZIM domain-containing protein 2 && PF06200:tify domain|PF09425:Divergent CCT motif
	MS.gene025386		TIFY3B	ath04075	Plant hormone signal transduction	119	20.6667	24.2033	4.62213	-2.38783	2.44517e-08	- && Q9C5K8.1 RecName: Full=Protein TIFY 3B; AltName: Full=Jasmonate ZIM domain-containing protein 12 && PF06200:tify domain|PF09425:Divergent CCT motif
	MS.gene067614	Ethylene	ETR1	ath04075/ath04016	Plant hormone signal transduction/MAPK signaling pathway - plant	126.333	299	7.25698	18.9772	1.38657	1.14726e-07	- && O81122.1 RecName: Full=Ethylene receptor && PF01590:GAF domain|PF00072:Response regulator receiver domain|PF02518:Histidine kinase-, DNA gyrase B-, and HSP90-like ATPase|PF00512:His Kinase A (phospho-acceptor) domain
	MS.gene98149		MKK4	ath04016/ath04626/ath04075	MAPK signaling pathway - plant/Plant-pathogen interaction/Plant hormone signal transduction	68.3333	199	7.90578	25.4277	1.68567	3.37538e-06	- && O80397.1 RecName: Full=Mitogen-activated protein kinase kinase 4; Short=AtMKK4; Short=MAP kinase kinase 4 && PF00069:Protein kinase domain
	MS.gene47530		MMK1	ath04016/ath04626/ath04075	MAPK signaling pathway - plant/Plant-pathogen interaction/Plant hormone signal transduction	2.66667	188	0.292434	22.8266	6.28495	2.80219e-22	- && Q07176.1 RecName: Full=Mitogen-activated protein kinase homolog MMK1; AltName: Full=MAP kinase ERK1; AltName: Full=MAP kinase MSK7 && PF00069:Protein kinase domain
	MS.gene25897		EIN3	ath04016/ath04075	MAPK signaling pathway - plant/Plant hormone signal transduction	38	92.3333	2.55094	6.79975	1.41577	0.0129995	- && O24606.1 RecName: Full=Protein ETHYLENE INSENSITIVE 3 && PF04873:Ethylene insensitive 3
	MS.gene031171	Cytokinin	UGT85A24	ath00908	Zeatin biosynthesis	0.333333	6	0.0252838	0.51276	4.22346	0.0361985	- && F8WKW1.1 RecName: Full=7-deoxyloganetin glucosyltransferase; AltName: Full=Genipin glucosyltransferase; AltName: Full=UDP-glucose glucosyltransferase 2; Short=GjUGT2; AltName: Full=UDP-glycosyltransferase 85A24 && PF00201:UDP-glucoronosyl and UDP-glu
	MS.gene00889		IPT5	ath00908	Zeatin biosynthesis	7.66667	0	0.957281	0	-5.23445	0.00953879	- && Q94ID2.2 RecName: Full=Adenylate isopentenyltransferase 5, chloroplastic; Short=AtIPT5; AltName: Full=Adenylate dimethylallyltransferase 5; AltName: Full=Cytokinin synthase 5; Flags: Precursor && PF01715:IPP transferase
	MS.gene34593		CKX6	ath00908	Zeatin biosynthesis	12	1	1.38946	0.124451	-3.46435	0.0234523	- && Q9LY71.2 RecName: Full=Cytokinin dehydrogenase 6; AltName: Full=Cytokinin oxidase 6; Short=AtCKX6; Short=AtCKX7; Short=CKO6; Flags: Precursor && PF01565:FAD binding domain|PF09265:Cytokinin dehydrogenase 1, FAD and cytokinin binding
	MS.gene80979		CYP735A2	ath00908	Zeatin biosynthesis	16	2	1.43258	0.199841	-2.85046	0.00679874	- && Q9ZW95.1 RecName: Full=Cytokinin hydroxylase; AltName: Full=Cytochrome P450 35A2 && PF00067:Cytochrome P450
Photosynthesis (ath00196)	MS.gene53061		PNSL2	ath00195	Photosynthesis	0.333333	6.66667	0.163757	3.61961	4.35156	0.0225048	- && Q9XI73.1 RecName: Full=Photosynthetic NDH subunit of lumenal location 2, chloroplastic; AltName: Full=PsbQ-like protein 1; Flags: Precursor && PF05757:Oxygen evolving enhancer protein 3 (PsbQ)
	MS.gene010427		PSBO	ath00195	Photosynthesis	2.66667	63	0.344411	8.96602	4.70302	3.68148e-11	- && P14226.1 RecName: Full=Oxygen-evolving enhancer protein 1, chloroplastic; Short=OEE1; AltName: Full=33 kDa subunit of oxygen evolving system of photosystem II; AltName: Full=33 kDa thylakoid membrane protein; AltName: Full=OEC 33 kDa subunit; Flags:
	MS.gene28526		PSBO	ath00195	Photosynthesis	553.667	2120	71.5962	301.191	2.07285	5.1479e-13	- && P14226.1 RecName: Full=Oxygen-evolving enhancer protein 1, chloroplastic; Short=OEE1; AltName: Full=33 kDa subunit of oxygen evolving system of photosystem II; AltName: Full=33 kDa thylakoid membrane protein; AltName: Full=OEC 33 kDa subunit; Flags:
	MS.gene061429		PPL1	ath00195	Photosynthesis	0.666667	18	0.11814	3.57238	4.90199	0.000543535	- && P82538.1 RecName: Full=PsbP-like protein 1, chloroplastic; AltName: Full=OEC23-like protein 4; AltName: Full=PsbP-related thylakoid lumenal protein 2; Flags: Precursor && PF01789:PsbP
	MS.gene063410		PSBR	ath00195	Photosynthesis	498.667	935	239.612	497.752	1.05465	0.00470962	- && P10690.1 RecName: Full=Photosystem II 10 kDa polypeptide, chloroplastic; Flags: Precursor && PF04725:Photosystem II 10 kDa polypeptide PsbR
	MS.gene75432		PSBS	ath00195	Photosynthesis	47	469.667	7.47142	81.2899	3.44499	4.06562e-08	- && Q02060.1 RecName: Full=Photosystem II 22 kDa protein, chloroplastic; AltName: Full=CP22; Flags: Precursor && PF00504:Chlorophyll A-B binding protein
	MS.gene94829		PSB28	ath00195	Photosynthesis	11.3333	53.3333	2.64001	13.6434	2.37063	5.76833e-05	- && Q0JG75.2 RecName: Full=Photosystem II reaction center PSB28 protein, chloroplastic; AltName: Full=Photosystem II protein W-like; Flags: Precursor && PF03912:Psb28 protein
	MS.gene66718		PSAO	ath00195	Photosynthesis	349.333	1116	106.464	375.49	1.81849	1.05845e-12	- && Q949Q5.1 RecName: Full=Photosystem I subunit O; Short=PSI-O; Flags: Precursor && -
	MS.gene002059		PETF	ath00195	Photosynthesis	21	259	5.81064	79.4505	3.77313	6.64951e-22	- && P09911.2 RecName: Full=Ferredoxin-1, chloroplastic; AltName: Full=Ferredoxin I; Flags: Precursor && PF00111:2Fe-2S iron-sulfur cluster binding domain
	MS.gene84322		FDX3	ath00195	Photosynthesis	12	61.3333	3.26472	18.3838	2.49238	7.1186e-05	- && P27788.1 RecName: Full=Ferredoxin-3, chloroplastic; AltName: Full=Ferredoxin III; Short=Fd III; Flags: Precursor && PF00111:2Fe-2S iron-sulfur cluster binding domain
	MS.gene014852		ATPF2	ath00195	Photosynthesis	128	221.333	33.0573	63.1026	0.93271	0.0155723	- && P31853.2 RecName: Full=ATP synthase subunit b', chloroplastic; AltName: Full=ATP synthase F(0) sector subunit b'; AltName: Full=ATPase subunit II; Flags: Precursor && PF00430:ATP synthase B/B' CF(0)
	MS.gene043393		PSB27	ath00195	Photosynthesis	171.333	4.33333	51.2493	1.43443	-5.16404	1.53984e-12	- && Q9LR64.1 RecName: Full=Photosystem II repair protein PSB27-H1, chloroplastic; Short=Psb27-H1; AltName: Full=Thylakoid lumenal protein PSB27-H1; Flags: Precursor && PF13326:Photosystem II Pbs27
	MS.gene24034		PIF1	ath00195	Photosynthesis	238.333	52.6667	18.5723	4.53166	-2.03547	5.78802e-11	- && Q8GZM7.1 RecName: Full=Transcription factor PIF1; AltName: Full=Basic helix-loop-helix protein 15; Short=AtbHLH15; Short=bHLH 15; AltName: Full=Protein PHY-INTERACTING FACTOR 1; AltName: Full=Protein PHYTOCHROME INTERACTING FACTOR 3-LIKE 5; AltName:
	MS.gene21084		PIF3	ath00195	Photosynthesis	99	43	5.85394	2.78349	-1.07239	0.003917	- && O80536.1 RecName: Full=Transcription factor PIF3; AltName: Full=Basic helix-loop-helix protein 8; Short=AtbHLH8; Short=bHLH 8; AltName: Full=Phytochrome-associated protein 3; AltName: Full=Phytochrome-interacting factor 3; AltName: Full=Transcription
	MS.gene56284		PSAG	ath00195	Photosynthesis	861.667	273.333	225.427	78.9517	-1.5138	6.28572e-10	- && Q9S7N7.1 RecName: Full=Photosystem I reaction center subunit V, chloroplastic; AltName: Full=PSI-G; Flags: Precursor && PF01241:Photosystem I psaG / psaK
	MS.gene043341		petC	ath00195	Photosynthesis	701.333	114.667	129.845	23.5068	-2.46607	7.83166e-11	- && P26291.1 RecName: Full=Cytochrome b6-f complex iron-sulfur subunit, chloroplastic; AltName: Full=Plastohydroquinone:plastocyanin oxidoreductase iron-sulfur protein; AltName: Full=Rieske iron-sulfur protein; Short=ISP; Short=RISP; Flags: Precursor &&
	MS.gene82755		ATPC	ath00195/ath00190	Photosynthesis/Oxidative phosphorylation	67.6667	0	9.40536	0	-8.38293	6.07437e-10	- && P29790.1 RecName: Full=ATP synthase gamma chain, chloroplastic; AltName: Full=F-ATPase gamma subunit; Flags: Precursor && PF00231:ATP synthase
MAPK signaling pathway – plant ( ath04016)	MS.gene98149		MKK4	ath04016/ath04626/ath04075	MAPK signaling pathway - plant/Plant-pathogen interaction/Plant hormone signal transduction	68.3333	199	7.90578	25.4277	1.68567	3.37538e-06	- && O80397.1 RecName: Full=Mitogen-activated protein kinase kinase 4; Short=AtMKK4; Short=MAP kinase kinase 4 && PF00069:Protein kinase domain
	MS.gene47530		MMK1	ath04016/ath04626/ath04075	MAPK signaling pathway - plant/Plant-pathogen interaction/Plant hormone signal transduction	2.66667	188	0.292434	22.8266	6.28495	2.80219e-22	- && Q07176.1 RecName: Full=Mitogen-activated protein kinase homolog MMK1; AltName: Full=MAP kinase ERK1; AltName: Full=MAP kinase MSK7 && PF00069:Protein kinase domain
	MS.gene55742		ACS1	ath00270/ath04016	Cysteine and methionine metabolism/MAPK signaling pathway - plant	20.3333	190	1.77313	18.5023	3.38291	1.51821e-05	- && P31531.1 RecName: Full=1-aminocyclopropane-1-carboxylate synthase; Short=ACC synthase; AltName: Full=S-adenosyl-L-methionine methylthioadenosine-lyase && PF00155:Aminotransferase class I and II
	MS.gene055420		NDPK1	ath04016/ath00240/ath00230	MAPK signaling pathway - plant/Pyrimidine metabolism/Purine metabolism	0	15	0	4.63021	6.47111	0.000550102	- && P47922.1 RecName: Full=Nucleoside diphosphate kinase 1; AltName: Full=Nucleoside diphosphate kinase I; Short=NDK I; Short=NDP kinase I; Short=NDPK I && PF00334:Nucleoside diphosphate kinase
	novel.6887		WRKY22	ath04626/ath04016	Plant-pathogen interaction/MAPK signaling pathway - plant	0	10	0	1.70625	5.90273	0.000706096	- && O04609.1 RecName: Full=WRKY transcription factor 22; AltName: Full=WRKY DNA-binding protein 22 && PF03106:WRKY DNA -binding domain
	MS.gene067614		ETR1	ath04075/ath04016	Plant hormone signal transduction/MAPK signaling pathway - plant	126.333	299	7.25698	18.9772	1.38657	1.14726e-07	- && O81122.1 RecName: Full=Ethylene receptor && PF01590:GAF domain|PF00072:Response regulator receiver domain|PF02518:Histidine kinase-, DNA gyrase B-, and HSP90-like ATPase|PF00512:His Kinase A (phospho-acceptor) domain
	MS.gene25897		EIN3	ath04075/ath04016	Plant hormone signal transduction/MAPK signaling pathway - plant	38	92.3333	2.55094	6.79975	1.41577	0.0129995	- && O24606.1 RecName: Full=Protein ETHYLENE INSENSITIVE 3 && PF04873:Ethylene insensitive 3
	MS.gene043230		CHI2	ath00520/ath04016	Amino sugar and nucleotide sugar metabolism/MAPK signaling pathway - plant	35.3333	173.667	5.96496	32.4746	2.44409	0.000842058	- && P21226.2 RecName: Full=Endochitinase A2; Flags: Precursor && PF00182:Chitinase class I|PF00187:Chitin recognition protein
	MS.gene70142		P43291	ath04075/ath04016	Plant hormone signal transduction/MAPK signaling pathway - plant	8	57.6667	0.975025	7.63376	2.97353	0.00241714	- && P43291.1 RecName: Full=Serine/threonine-protein kinase SRK2A; AltName: Full=Arabidopsis protein SK1; AltName: Full=OST1-kinase-like 7; AltName: Full=SNF1-related kinase 2.4; Short=SnRK2.4 && PF00069:Protein kinase domain
	MS.gene66596		ANP3	ath04016	MAPK signaling pathway - plant	5	28	0.684226	4.23796	2.63148	0.000836379	- && O22042.1 RecName: Full=Mitogen-activated protein kinase kinase kinase 3; AltName: Full=Arabidopsis NPK1-related protein kinase 3 && PF00069:Protein kinase domain
	MS.gene016892		CAL1	ath04070/ath04626/ath04016	Phosphatidylinositol signaling system/Plant-pathogen interaction/MAPK signaling pathway - plant	1.33333	21.6667	0.376824	6.68126	4.14614	0.0051815	- && P17928.2 RecName: Full=Calmodulin; Short=CaM && PF13499:EF-hand domain pair
	MS.gene98149		MKK4	ath04016/ath04626	MAPK signaling pathway - plant/Plant-pathogen interaction	68.3333	199	7.90578	25.4277	1.68567	3.37538e-06	- && O80397.1 RecName: Full=Mitogen-activated protein kinase kinase 4; Short=AtMKK4; Short=MAP kinase kinase 4 && PF00069:Protein kinase domain
	MS.gene004143		MPK3	ath04016/ath04626	MAPK signaling pathway - plant/Plant-pathogen interaction	813	40.3333	92.8986	5.0579	-4.1979	1.66394e-12	- && Q39023.2 RecName: Full=Mitogen-activated protein kinase 3; Short=AtMPK3; Short=MAP kinase 3 && PF00069:Protein kinase domain
	MS.gene049457		WRKY24	ath04016/ath04626	MAPK signaling pathway - plant/Plant-pathogen interaction	52.3333	10.3333	4.33959	0.960154	-2.18249	0.00184645	- && Q6IEQ7.1 RecName: Full=WRKY transcription factor WRKY24; Short=OsWRKY24 && PF03106:WRKY DNA -binding domain
	MS.gene011379		NDPK2	ath00240/ath00230/ath04016	Pyrimidine metabolism/Purine metabolism/MAPK signaling pathway - plant	21.6667	1	3.96375	0.198046	-4.30392	0.000705732	- && P47923.1 RecName: Full=Nucleoside diphosphate kinase 2, chloroplastic; AltName: Full=Nucleoside diphosphate kinase II; Short=NDK II; Short=NDP kinase II; Short=NDPK II; Contains: RecName: Full=Nucleoside diphosphate kinase 2 high molecular weight; Co
	MS.gene071870		PR-1	ath04016/ath04626/ath04075	MAPK signaling pathway - plant/Plant-pathogen interaction/Plant hormone signal transduction	113.667	0	15.6253	0	-9.12946	3.88108e-12	- && P33154.1 RecName: Full=Pathogenesis-related protein 1; Short=PR-1; Flags: Precursor && PF01490:Transmembrane amino acid transporter protein|PF11744:Aluminium activated malate transporter|PF00188:Cysteine-rich secretory protein family
	MS.gene013622		PYL8	ath04075/ath04016	Plant hormone signal transduction/MAPK signaling pathway - plant	54.6667	0.666667	11.656	0.154082	-6.21966	5.19858e-07	- && Q9FGM1.1 RecName: Full=Abscisic acid receptor PYL8; AltName: Full=ABI1-binding protein 1; AltName: Full=PYR1-like protein 8; AltName: Full=Regulatory components of ABA receptor 3 && PF10604:Polyketide cyclase / dehydrase and lipid transport
	MS.gene047674		SRK2I	ath04075/ath04016	Plant hormone signal transduction/MAPK signaling pathway - plant	201.667	66	24.0457	8.7345	-1.46158	0.00192615	- && Q39193.1 RecName: Full=Serine/threonine-protein kinase SRK2I; AltName: Full=OST1-kinase-like 2; AltName: Full=Protein ATHPROKIN B; AltName: Full=SNF1-related kinase 2.3; Short=SnRK2.3 && PF00069:Protein kinase domain
	MS.gene064838		CAT4	ath04016/ath01200/ath00380/ath04146	MAPK signaling pathway - plant/Carbon metabolism/Tryptophan metabolism/Peroxisome	1079	615.333	97.2128	61.1965	-0.667723	0.0349502	- && O48561.1 RecName: Full=Catalase-4 && PF06628:Catalase-related immune-responsive|PF00199:Catalase
	novel.6624		PCM3	ath04070/ath04626	Phosphatidylinositol signaling system/Plant-pathogen interaction/MAPK signaling pathway - plant	19.6667	0	8.18687	0	-6.59801	1.79771e-05	- && Q41420.1 PUTATIVE PSEUDOGENE: RecName: Full=Putative calmodulin-3; Short=CaM-3 && PF13499:EF-hand domain pair
	MS.gene011287		RBOHC	ath04016/ath04626	MAPK signaling pathway - plant/Plant-pathogen interaction	145.667	43.3333	25.2633	8.25939	-1.61177	7.57412e-06	- && Q2HXL0.2 RecName: Full=Respiratory burst oxidase homolog protein C; AltName: Full=NADPH oxidase RBOHC; AltName: Full=StRBOHC && PF08414:Respiratory burst NADPH oxidase
	MS.gene044449		RBOHF	ath04016/ath04626	MAPK signaling pathway - plant/Plant-pathogen interaction	471.667	202.333	19.3129	9.08363	-1.08764	0.00379544	- && O48538.1 RecName: Full=Respiratory burst oxidase homolog protein F; AltName: Full=Cytochrome b245 beta chain homolog RbohAp108; AltName: Full=NADPH oxidase RBOHF; Short=AtRBOHF && PF08414:Respiratory burst NADPH oxidase|PF00076:RNA recognition motif.
	novel.3275		RBOHF	ath04016/ath04626	MAPK signaling pathway - plant/Plant-pathogen interaction	36	0.333333	5.69274	0.0571098	-6.50817	1.89942e-05	- && O48538.1 RecName: Full=Respiratory burst oxidase homolog protein F; AltName: Full=Cytochrome b245 beta chain homolog RbohAp108; AltName: Full=NADPH oxidase RBOHF; Short=AtRBOHF && PF08030:Ferric reductase NAD binding domain
photosynthesis − antenna proteins ( ath00196)	MS.gene65534		LHCA1	ath00196	Photosynthesis - antenna proteins	1646.33	4135	292.786	816.503	1.4796	0.00038508	- && Q01667.1 RecName: Full=Chlorophyll a-b binding protein 6, chloroplastic; AltName: Full=LHCI-730; AltName: Full=LHCII type III CAB-6; AltName: Full=Light-harvesting complex protein Lhca1; Flags: Precursor && -
	MS.gene029939		LHCB5	ath00196	Photosynthesis - antenna proteins	7201.33	17463.3	1060.26	2848.89	1.42598	0.000340431	- && Q9XF89.1 RecName: Full=Chlorophyll a-b binding protein CP26, chloroplastic; AltName: Full=LHCB5; AltName: Full=LHCIIc; AltName: Full=Light-harvesting complex II protein 5; Flags: Precursor && PF00504:Chlorophyll A-B binding protein
	MS.gene018915		LHCA-P4	ath00196	Photosynthesis - antenna proteins	2074	3106.33	406.127	671.411	0.725271	0.0455184	- && Q9SQL2.1 RecName: Full=Chlorophyll a-b binding protein P4, chloroplastic; AltName: Full=LHCI type III CAB-P4; Flags: Precursor && PF00504:Chlorophyll A-B binding protein
	MS.gene031027		CAB40	ath00196	Photosynthesis - antenna proteins	2.66667	50.3333	0.503366	10.5696	4.39569	7.79912e-07	- && P27495.1 RecName: Full=Chlorophyll a-b binding protein 40, chloroplastic; AltName: Full=LHCII type I CAB-40; Short=LHCP; Flags: Precursor && PF00504:Chlorophyll A-B binding protein
	MS.gene054642		LHCA5	ath00196	Photosynthesis - antenna proteins	0	28	0	4.88396	7.38453	2.35674e-06	- && Q9C639.1 RecName: Full=Photosystem I chlorophyll a/b-binding protein 5, chloroplastic; Short=Lhca5; AltName: Full=LHCI type III LHCA5; Flags: Precursor && PF00504:Chlorophyll A-B binding protein
	MS.gene025268		LHCA6	ath00196	Photosynthesis - antenna proteins	69.3333	9	11.0788	1.60156	-2.79445	0.000319847	- && Q8LCQ4.1 RecName: Full=Photosystem I chlorophyll a/b-binding protein 6, chloroplastic; AltName: Full=LHCI type III LHCA6; Flags: Precursor && PF00504:Chlorophyll A-B binding protein
	MS.gene08487		CAB7	ath00196	Photosynthesis - antenna proteins	6978	3457	1067.66	583.928	-0.870601	0.00495633	- && P10708.1 RecName: Full=Chlorophyll a-b binding protein 7, chloroplastic; AltName: Full=LHCI type II CAB-7; Flags: Precursor && PF00504:Chlorophyll A-B binding protein
	MS.gene031355		CAB13	ath00196	Photosynthesis - antenna proteins	5296	1762	846.007	309.98	-1.44847	8.72817e-08	- && P27489.1 RecName: Full=Chlorophyll a-b binding protein 13, chloroplastic; AltName: Full=LHCII type III CAB-13; Flags: Precursor && PF00504:Chlorophyll A-B binding protein
	MS.gene037454		LHCB4.1	ath00196	Photosynthesis - antenna proteins	2667.33	1057	393.196	173.26	-1.1824	0.0277215	- && Q07473.1 RecName: Full=Chlorophyll a-b binding protein CP29.1, chloroplastic; AltName: Full=LHCB4.1; AltName: Full=LHCII protein 4.1; Flags: Precursor && PF00504:Chlorophyll A-B binding protein
	MS.gene01160		CAP10A	ath00196	Photosynthesis - antenna proteins	2692.67	63.3333	438.855	11.2453	-5.28474	5.65408e-30	- && P27524.1 RecName: Full=Chlorophyll a-b binding protein CP24 10A, chloroplastic; Short=CAB-10A; Short=LHCP; Flags: Precursor && PF00504:Chlorophyll A-B binding protein
	novel.1938		LHCA-P4	ath00196	Photosynthesis - antenna proteins	101.667	37.6667	6.90723	2.83713	-1.28529	0.00187457	- && Q9SQL2.1 RecName: Full=Chlorophyll a-b binding protein P4, chloroplastic; AltName: Full=LHCI type III CAB-P4; Flags: Precursor && -
	novel.8265		LHCA-P4	ath00196	Photosynthesis - antenna proteins	16	1.66667	1.63311	0.188104	-3.11498	0.0245865	- && Q9SQL2.1 RecName: Full=Chlorophyll a-b binding protein P4, chloroplastic; AltName: Full=LHCI type III CAB-P4; Flags: Precursor && -
Citrate cycle (TCA cycle) (ath00020)	MS.gene71850		LTA2	ath01200/ath00010/ath00620/ath00020/ath00260/ath00640/ath00310/ath00380	Carbon metabolism/Glycolysis / Gluconeogenesis/Pyruvate metabolism/Citrate cycle (TCA cycle)/Glycine, serine and threonine metabolism/ath00640/Lysine degradation/Tryptophan metabolism	38.3333	126.667	3.50725	12.7025	1.85683	0.0214842	- && Q9SQI8.1 RecName: Full=Dihydrolipoyllysine-residue acetyltransferase component 4 of pyruvate dehydrogenase complex, chloroplastic; AltName: Full=Dihydrolipoamide S-acetyltransferase component 4 of pyruvate dehydrogenase complex; AltName: Full=Pyruvat
	MS.gene33970		EMB3003	ath01200/ath00020	Carbon metabolism/Citrate cycle (TCA cycle)	118.667	197.667	11.0116	20.2541	0.87893	0.0072737	- && Q9C8P0.1 RecName: Full=Dihydrolipoyllysine-residue acetyltransferase component 5 of pyruvate dehydrogenase complex, chloroplastic; AltName: Full=Dihydrolipoamide S-acetyltransferase component 5 of pyruvate dehydrogenase complex; AltName: Full=Protein
	MS.gene07846		ODP22	ath01200/ath00020/ath00010/ath00620	Carbon metabolism/Citrate cycle (TCA cycle)/Glycolysis / Gluconeogenesis/Pyruvate metabolism	57	374.667	5.12062	37.8301	2.8844	0.000641757	- && Q8RWN9.2 RecName: Full=Dihydrolipoyllysine-residue acetyltransferase component 2 of pyruvate dehydrogenase complex, mitochondrial; AltName: Full=Dihydrolipoamide S-acetyltransferase component 2 of pyruvate dehydrogenase complex; AltName: Full=Pyruvat
	novel.515		LTA3	ath01200/ath00020/ath00010/ath00620	Carbon metabolism/Citrate cycle (TCA cycle)/Glycolysis / Gluconeogenesis/Pyruvate metabolism	85	143.333	19.6108	36.657	0.9016	0.0107943	- && Q0WQF7.2 RecName: Full=Dihydrolipoyllysine-residue acetyltransferase component 1 of pyruvate dehydrogenase complex, mitochondrial; AltName: Full=Dihydrolipoamide S-acetyltransferase component 1 of pyruvate dehydrogenase complex; AltName: Full=Pyruvat
	MS.gene62562		LPD2	ath01200/ath00020/ath00010/ath00620	Carbon metabolism/Citrate cycle (TCA cycle)/Glycolysis / Gluconeogenesis/Pyruvate metabolism	0.333333	24	0.0321831	2.59678	6.20938	2.37995e-05	- && F4JLP5.2 RecName: Full=Dihydrolipoyl dehydrogenase 2, chloroplastic; Short=ptLPD2; AltName: Full=Dihydrolipoamide dehydrogenase 2; AltName: Full=Protein LIPOAMIDE DEHYDROGENASE 2; AltName: Full=Pyruvate dehydrogenase complex E3 subunit 2; Short=E3-2;
	MS.gene053394		mMDH	ath01200/ath00620/ath00710/ath00630/ath00020/ath00270	Carbon metabolism/Pyruvate metabolism/Carbon fixation in photosynthetic organisms/Glyoxylate and dicarboxylate metabolism/Citrate cycle (TCA cycle)/Cysteine and methionine metabolism	1163.33	3946.33	148.633	553.593	1.89708	2.19018e-08	- && O48905.1 RecName: Full=Malate dehydrogenase, cytoplasmic && -
	MS.gene000521		ACO3	ath01200/ath01230/ath00630/ath01210/ath00020	Carbon metabolism/Biosynthesis of amino acids/Glyoxylate and dicarboxylate metabolism/2-Oxocarboxylic acid metabolism/Citrate cycle (TCA cycle)	0	58	0	6.72949	8.45196	1.08407e-09	- && Q9SIB9.2 RecName: Full=Aconitate hydratase 2, mitochondrial; Short=Aconitase 2; AltName: Full=Citrate hydro-lyase 2; Flags: Precursor && PF05602:Cleft lip and palate transmembrane protein 1 (CLPTM1)|PF00330:Aconitase family (aconitate hydratase)
	MS.gene017544		IDH2	ath01200/ath01230/ath00630/ath01210/ath00020	Carbon metabolism/Biosynthesis of amino acids/Glyoxylate and dicarboxylate metabolism/2-Oxocarboxylic acid metabolism/Citrate cycle (TCA cycle)	422.333	912.667	48.321	115.763	1.2603	4.09649e-05	- && P93032.2 RecName: Full=Isocitrate dehydrogenase [NAD] regulatory subunit 2, mitochondrial; AltName: Full=IDH-II; AltName: Full=Isocitric dehydrogenase 2; AltName: Full=NAD(+)-specific ICDH 2; Flags: Precursor && PF00180:Isocitrate/isopropylmalate deh
	MS.gene95556		SDH3-1	ath01200/ath00190/ath00020	Carbon metabolism/Oxidative phosphorylation/Citrate cycle (TCA cycle)	312.667	501.667	54.5753	96.8867	0.827883	0.00556839	- && P0DKI0.1 RecName: Full=Succinate dehydrogenase subunit 3-1, mitochondrial; Flags: Precursor >P0DKI1.1 RecName: Full=Succinate dehydrogenase subunit 3-2, mitochondrial; Flags: Precursor && PF01127:Succinate dehydrogenase/Fumarate reductase transmembra
	MS.gene002068		OGDC	ath01200/ath00020/ath00310/ath00380	Carbon metabolism/itrate cycle (TCA cycle)/Lysine degradation/Tryptophan metabolism	8	190	0.852827	21.7534	4.67757	5.75805e-06	- && Q8H107.2 RecName: Full=Dihydrolipoyllysine-residue succinyltransferase component of 2-oxoglutarate dehydrogenase complex 2, mitochondrial; AltName: Full=2-oxoglutarate dehydrogenase complex component E2-2; Short=OGDC-E2-2; AltName: Full=Dihydrolipoam
	MS.gene011262		ODP22	ath00010/ath00620/ath00020	Glycolysis / Gluconeogenesis/Pyruvate metabolism/Citrate cycle (TCA cycle)	529.667	271.333	41.5255	23.5551	-0.81833	0.0115632	- && Q8RWN9.2 RecName: Full=Dihydrolipoyllysine-residue acetyltransferase component 2 of pyruvate dehydrogenase complex, mitochondrial; AltName: Full=Dihydrolipoamide S-acetyltransferase component 2 of pyruvate dehydrogenase complex; AltName: Full=Pyruvat
	MS.gene08312		E1-BETA-2	ath01200/ath00010/ath00620	Carbon metabolism/Glycolysis / Gluconeogenesis/Pyruvate metabolism	27	2	2.83837	0.230066	-3.61664	0.000138959	- && O64688.1 RecName: Full=Pyruvate dehydrogenase E1 component subunit beta-3, chloroplastic; Flags: Precursor && PF02779:Transketolase, pyrimidine binding domain|PF02780:Transketolase, C-terminal domain
	MS.gene08518		PDH-E1 ALPHA	ath01200/ath00010/ath00620/ath00020	Carbon metabolism/Glycolysis / Gluconeogenesis/Pyruvate metabolism/Citrate cycle (TCA cycle)	309.667	63	30.8203	6.91507	-2.15585	3.18185e-15	- && O24457.1 RecName: Full=Pyruvate dehydrogenase E1 component subunit alpha-3, chloroplastic; Flags: Precursor && PF00676:Dehydrogenase E1 component
	MS.gene26810		LPD	ath01200/ath00010/ath00620/ath00020/ath00260/ath00640/ath00310/ath00380	Carbon metabolism/Glycolysis / Gluconeogenesis/Pyruvate metabolism/Citrate cycle (TCA cycle)/Glycine, serine and threonine metabolism/ath00640/Lysine degradation/Tryptophan metabolism	26.6667	0.333333	2.26155	0.0306326	-6.07726	3.84045e-05	- && P31023.2 RecName: Full=Dihydrolipoyl dehydrogenase, mitochondrial; AltName: Full=Dihydrolipoamide dehydrogenase; AltName: Full=Glycine cleavage system L protein; AltName: Full=Pyruvate dehydrogenase complex E3 subunit; Short=E3; Short=PDC-E3; Flags:
	MS.gene007924		cMDH	ath01200/ath00620/ath00710/ath00630/ath00020/ath00270	Carbon metabolism/Pyruvate metabolism/Carbon fixation in photosynthetic organisms/Glyoxylate and dicarboxylate metabolism/Citrate cycle (TCA cycle)/Cysteine and methionine metabolism	614.333	309.667	75.9593	41.9868	-0.854956	0.0485071	- && P17783.1 RecName: Full=Malate dehydrogenase, mitochondrial; Flags: Precursor && PF02866:lactate/malate dehydrogenase, alpha/beta C-terminal domain|PF00056:lactate/malate dehydrogenase, NAD binding domain
	MS.gene44351		ACLA-1	ath00020	Citrate cycle (TCA cycle)	527.667	194	52.9214	21.766	-1.28245	0.0105435	- && Q9SGY2.1 RecName: Full=ATP-citrate synthase alpha chain protein 1; Short=ATP-citrate synthase A-1; AltName: Full=ATP-citrate lyase A-1; AltName: Full=Citrate cleavage enzyme A-1 && PF08442:ATP-grasp domain|PF16114:ATP citrate lyase citrate-binding
Glycolysis / Gluconeogenesis (ath00010)	MS.gene21950		HXK3	ath01200/ath00010/ath00051/ath00520/ath00500/ath00052	Carbon metabolism/Gluconeogenesis/Fructose and mannose metabolism/Amino sugar and nucleotide sugar metabolism/Starch and sucrose metabolism/Galactose metabolism	90	190	7.7119	17.8685	1.21276	0.00129981	- && Q9LPS1.1 RecName: Full=Hexokinase-3 && PF03727:Hexokinase|PF00349:Hexokinase
	MS.gene043259		GALM	ath00010/ath00052	Glycolysis / Gluconeogenesis/Galactose metabolism	36	70.6667	4.23861	9.18174	1.11552	0.0415364	- && Q5EA79.1 RecName: Full=Aldose 1-epimerase; AltName: Full=Galactose mutarotase && PF01263:Aldose 1-epimerase
	MS.gene28286		PFP-BETA	ath00010/ath00030	Glycolysis / Gluconeogenesis/Pentose phosphate pathway	127	3646.67	9.56647	303.888	4.98916	5.95594e-97	- && Q41141.1 RecName: Full=Pyrophosphate--fructose 6-phosphate 1-phosphotransferase subunit beta; Short=PFP; AltName: Full=6-phosphofructokinase, pyrophosphate dependent; AltName: Full=PPi-PFK; AltName: Full=Pyrophosphate-dependent 6-phosphofructose-1-ki
	novel.1006		GAPC1	ath01200/ath00010/ath01230/ath00710/ath00051/ath00030	Carbon metabolism/Glycolysis / Gluconeogenesis/Biosynthesis of amino acids/Carbon fixation in photosynthetic organisms/Fructose and mannose metabolism/Pentose phosphate pathway	0.333333	2524	0.026666	225.575	12.9217	1.03094e-24	- && P34922.1 RecName: Full=Glyceraldehyde-3-phosphate dehydrogenase, cytosolic && PF00044:Glyceraldehyde 3-phosphate dehydrogenase, NAD binding domain
	MS.gene011851		At3g50520	ath01200/ath00010/ath01230/ath00260	Carbon metabolism/Glycolysis / Gluconeogenesis/Biosynthesis of amino acids/Glycine, serine and threonine metabolism	22.3333	44.6667	3.92716	8.73515	1.15103	0.048848	- && Q9SCS3.1 RecName: Full=Phosphoglycerate mutase-like protein 4 && PF00300:Histidine phosphatase superfamily (branch 1)
	MS.gene51721		GPMA	ath01200/ath00010/ath01230/ath00260	Carbon metabolism/Glycolysis / Gluconeogenesis/Biosynthesis of amino acids/Glycine, serine and threonine metabolism	28.3333	80	7.70849	23.9849	1.63795	0.000507854	- && Q6MEW4.1 RecName: Full=2,3-bisphosphoglycerate-dependent phosphoglycerate mutase; Short=BPG-dependent PGAM; Short=PGAM; Short=Phosphoglyceromutase; Short=dPGM && PF00300:Histidine phosphatase superfamily (branch 1)
	MS.gene92802		PGM1	ath01200/ath00010/ath01230/ath00260	Carbon metabolism/Glycolysis / Gluconeogenesis/Biosynthesis of amino acids/Glycine, serine and threonine metabolism	6.33333	183	0.481123	15.3677	4.99222	3.81842e-19	- && Q42908.1 RecName: Full=2,3-bisphosphoglycerate-independent phosphoglycerate mutase; Short=BPG-independent PGAM; Short=Phosphoglyceromutase; AltName: Full=PGAM-I && PF01676:Metalloenzyme superfamily|PF06415:BPG-independent PGAM N-terminus (iPGM_N)
	MS.gene045798		ENO1	ath01200/ath00010/ath01230/ath03018	Carbon metabolism/Glycolysis / Gluconeogenesis/Biosynthesis of amino acids/RNA degradation	38	113.667	3.30025	10.9419	1.72928	0.00211913	- && Q9C9C4.1 RecName: Full=Enolase 1, chloroplastic; AltName: Full=2-phospho-D-glycerate hydro-lyase 1; AltName: Full=2-phosphoglycerate dehydratase 1; Flags: Precursor && PF00113:Enolase, C-terminal TIM barrel domain|PF03952:Enolase, N-terminal domain
	MS.gene68025		PKP2	ath01200/ath00010/ath01230/ath00230/ath00620	Carbon metabolism/Glycolysis / Gluconeogenesis/Biosynthesis of amino acids/Purine metabolism/Pyruvate metabolism	3	14.6667	0.445147	2.41689	2.43979	0.0187078	- && Q9FLW9.1 RecName: Full=Plastidial pyruvate kinase 2; Short=PKp2; AltName: Full=Plastidial pyruvate kinase 1; Short=PKP1; AltName: Full=Pyruvate kinase III; AltName: Full=Pyruvate kinase isozyme B1, chloroplastic; Short=PKP-BETA1; Short=Plastidic pyru
	MS.gene069033		PDC2	ath00010	Glycolysis / Gluconeogenesis	243.667	653.667	17.1481	50.817	1.56708	1.70615e-07	- && Q9FFT4.1 RecName: Full=Pyruvate decarboxylase 2; Short=AtPDC2 && PF02775:Thiamine pyrophosphate enzyme, C-terminal TPP binding domain|PF02776:Thiamine pyrophosphate enzyme, N-terminal TPP binding domain|PF00205:Thiamine pyrophosphate enzyme, central
	MS.gene89779		PDC4	ath00010	Glycolysis / Gluconeogenesis	3	14	0.208507	1.08001	2.3679	0.0224712	- && Q9M040.1 RecName: Full=Pyruvate decarboxylase 4; Short=AtPDC4 && PF02776:Thiamine pyrophosphate enzyme, N-terminal TPP binding domain|PF02775:Thiamine pyrophosphate enzyme, C-terminal TPP binding domain|PF00205:Thiamine pyrophosphate enzyme, central
	MS.gene71850		LTA2	ath01200/ath00010/ath00620/ath00020/ath00260/ath00640/ath00310/ath00380	Carbon metabolism/Glycolysis / Gluconeogenesis/Pyruvate metabolism/Citrate cycle (TCA cycle)/Glycine, serine and threonine metabolism/ath00640/Lysine degradation/Tryptophan metabolism	38.3333	126.667	3.50725	12.7025	1.85683	0.0214842	- && Q9SQI8.1 RecName: Full=Dihydrolipoyllysine-residue acetyltransferase component 4 of pyruvate dehydrogenase complex, chloroplastic; AltName: Full=Dihydrolipoamide S-acetyltransferase component 4 of pyruvate dehydrogenase complex; AltName: Full=Pyruvat
	MS.gene33970		EMB3003	ath01200/ath00020	Carbon metabolism/Citrate cycle (TCA cycle)	118.667	197.667	11.0116	20.2541	0.87893	0.0072737	- && Q9C8P0.1 RecName: Full=Dihydrolipoyllysine-residue acetyltransferase component 5 of pyruvate dehydrogenase complex, chloroplastic; AltName: Full=Dihydrolipoamide S-acetyltransferase component 5 of pyruvate dehydrogenase complex; AltName: Full=Protein
	MS.gene07846		ODP22	ath01200/ath00020/ath00010/ath00620	Carbon metabolism/Citrate cycle (TCA cycle)/Glycolysis / Gluconeogenesis/Pyruvate metabolism	57	374.667	5.12062	37.8301	2.8844	0.000641757	- && Q8RWN9.2 RecName: Full=Dihydrolipoyllysine-residue acetyltransferase component 2 of pyruvate dehydrogenase complex, mitochondrial; AltName: Full=Dihydrolipoamide S-acetyltransferase component 2 of pyruvate dehydrogenase complex; AltName: Full=Pyruvat
	novel.515		LTA3	ath01200/ath00020/ath00010/ath00620	Carbon metabolism/Citrate cycle (TCA cycle)/Glycolysis / Gluconeogenesis/Pyruvate metabolism	85	143.333	19.6108	36.657	0.9016	0.0107943	- && Q0WQF7.2 RecName: Full=Dihydrolipoyllysine-residue acetyltransferase component 1 of pyruvate dehydrogenase complex, mitochondrial; AltName: Full=Dihydrolipoamide S-acetyltransferase component 1 of pyruvate dehydrogenase complex; AltName: Full=Pyruvat
	MS.gene62562		LPD2	ath01200/ath00020/ath00010/ath00620	Carbon metabolism/Citrate cycle (TCA cycle)/Glycolysis / Gluconeogenesis/Pyruvate metabolism	0.333333	24	0.0321831	2.59678	6.20938	2.37995e-05	- && F4JLP5.2 RecName: Full=Dihydrolipoyl dehydrogenase 2, chloroplastic; Short=ptLPD2; AltName: Full=Dihydrolipoamide dehydrogenase 2; AltName: Full=Protein LIPOAMIDE DEHYDROGENASE 2; AltName: Full=Pyruvate dehydrogenase complex E3 subunit 2; Short=E3-2;
	MS.gene66419		HXK1	ath01200/ath00010/ath00051/ath00520/ath00500/ath00052	Carbon metabolism/Gluconeogenesis/Fructose and mannose metabolism/Amino sugar and nucleotide sugar metabolism/Starch and sucrose metabolism/Galactose metabolism	65.6667	29	7.70109	3.74225	-1.0404	0.0202037	- && Q9SEK3.1 RecName: Full=Hexokinase-1; AltName: Full=SoHxK1 && PF00349:Hexokinase|PF03727:Hexokinase
	MS.gene27072		HXK2	ath01200/ath00010/ath00051/ath00520/ath00500/ath00052	Carbon metabolism/Gluconeogenesis/Fructose and mannose metabolism/Amino sugar and nucleotide sugar metabolism/Starch and sucrose metabolism/Galactose metabolism	326.667	106.667	33.4507	12.107	-1.46721	1.93654e-06	- && Q6Q8A5.1 RecName: Full=Hexokinase-2, chloroplastic; AltName: Full=NtHxK2; Flags: Precursor && PF00349:Hexokinase|PF03727:Hexokinase
	MS.gene050010		PGI1	ath01200/ath00010/ath00051/ath00520/ath00030/ath00500	Carbon metabolism/Gluconeogenesis/Fructose and mannose metabolism/Amino sugar and nucleotide sugar metabolism/Pentose phosphate pathway/Starch and sucrose metabolism	270.333	62.6667	18.6059	4.73021	-1.97489	0.00128426	- && Q8H103.1 RecName: Full=Glucose-6-phosphate isomerase 1, chloroplastic; Short=GPI 1; AltName: Full=Phosphoglucose isomerase 1; Short=PGI 1; AltName: Full=Phosphohexose isomerase; Short=PHI; Flags: Precursor && PF00342:Phosphoglucose isomerase
	novel.5677		PFP-ALPHA	ath00010/ath00051/ath00030	Glycolysis / Gluconeogenesis/Fructose and mannose metabolism/Pentose phosphate pathway	111.333	0	18.9627	0	-9.09487	1.01543e-11	- && Q41140.1 RecName: Full=Pyrophosphate--fructose 6-phosphate 1-phosphotransferase subunit alpha; Short=PFP; AltName: Full=6-phosphofructokinase, pyrophosphate dependent; AltName: Full=PPi-PFK; AltName: Full=Pyrophosphate-dependent 6-phosphofructose-1-k
	MS.gene012768		PFK2	ath01200/ath00010/ath01230/ath00051/ath00030	Carbon metabolism/Glycolysis / Gluconeogenesis/Biosynthesis of amino acids/Fructose and mannose metabolism/Pentose phosphate pathway	100.667	44	9.25971	4.46578	-1.05201	0.00321121	- && Q9FIK0.1 RecName: Full=ATP-dependent 6-phosphofructokinase 2; Short=ATP-PFK 2; Short=Phosphofructokinase 2; AltName: Full=Phosphohexokinase 2 && PF00365:Phosphofructokinase
	MS.gene045741		GAPCP1	ath01200/ath00010/ath01230/ath00710/ath00051/ath00030	Carbon metabolism/Glycolysis / Gluconeogenesis/Biosynthesis of amino acids/Carbon fixation in photosynthetic organisms/Fructose and mannose metabolism/Pentose phosphate pathway	156	0	9.03666	0	-9.58316	2.90727e-88	- && Q9SAJ6.1 RecName: Full=Glyceraldehyde-3-phosphate dehydrogenase GAPCP1, chloroplastic; AltName: Full=Glyceraldehyde-3-phosphate dehydrogenase of plastid 1; AltName: Full=NAD-dependent glyceraldehydephosphate dehydrogenase chloroplastic 1; Flags: Prec
	MS.gene62087		GAPN	ath01200/ath00010/ath00030	Carbon metabolism/Glycolysis / Gluconeogenesis/Pentose phosphate pathway	298	51	25.7498	4.80153	-2.42215	0.00381114	- && P81406.1 RecName: Full=NADP-dependent glyceraldehyde-3-phosphate dehydrogenase; AltName: Full=Glyceraldehyde-3-phosphate dehydrogenase [NADP(+)]; AltName: Full=Non-phosphorylating glyceraldehyde 3-phosphate dehydrogenase; AltName: Full=Triosephosphat
	MS.gene074525		TRMB	ath01200/ath00010/ath01230/ath00710	Carbon metabolism/Glycolysis / Gluconeogenesis/Biosynthesis of amino acids/Carbon fixation in photosynthetic organisms	12	0.333333	0.674973	0.0203543	-4.9229	0.03886	- && B0JUK5.1 RecName: Full=tRNA (guanine-N(7)-)-methyltransferase; AltName: Full=tRNA (guanine(46)-N(7))-methyltransferase; AltName: Full=tRNA(m7G46)-methyltransferase && PF02390:Putative methyltransferase|PF00162:Phosphoglycerate kinase
	MS.gene034948		Os11g0148500	ath01200/ath00010/ath01230/ath00620/ath00230	Carbon metabolism/Glycolysis / Gluconeogenesis/Biosynthesis of amino acids/Pyruvate metabolism/Purine metabolism	301	116.333	24.2175	10.2544	-1.23908	0.000138959	- && Q2RAK2.1 RecName: Full=Pyruvate kinase 1, cytosolic; Short=OsPK1 >B8BJ39.1 RecName: Full=Pyruvate kinase 1, cytosolic; Short=OsPK1 && -
	MS.gene08312		E1-BETA-2	ath01200/ath00010/ath00620	Carbon metabolism/Glycolysis / Gluconeogenesis/Pyruvate metabolism	27	2	2.83837	0.230066	-3.61664	3.84045e-05	- && O64688.1 RecName: Full=Pyruvate dehydrogenase E1 component subunit beta-3, chloroplastic; Flags: Precursor && PF02779:Transketolase, pyrimidine binding domain|PF02780:Transketolase, C-terminal domain
	MS.gene011262		ODP22	ath00010/ath00620/ath00020	Glycolysis / Gluconeogenesis/Pyruvate metabolism/Citrate cycle (TCA cycle)	529.667	271.333	41.5255	23.5551	-0.81833	0.000389717	- && Q8RWN9.2 RecName: Full=Dihydrolipoyllysine-residue acetyltransferase component 2 of pyruvate dehydrogenase complex, mitochondrial; AltName: Full=Dihydrolipoamide S-acetyltransferase component 2 of pyruvate dehydrogenase complex; AltName: Full=Pyruvat
	MS.gene26810		LPD	ath01200/ath00010/ath00620/ath00020/ath00260/ath00640/ath00310/ath00380	Carbon metabolism/Glycolysis / Gluconeogenesis/Pyruvate metabolism/Citrate cycle (TCA cycle)/Glycine, serine and threonine metabolism/ath00640/Lysine degradation/Tryptophan metabolism	26.6667	0.333333	2.26155	0.0306326	-6.07726	0.049862	- && P31023.2 RecName: Full=Dihydrolipoyl dehydrogenase, mitochondrial; AltName: Full=Dihydrolipoamide dehydrogenase; AltName: Full=Glycine cleavage system L protein; AltName: Full=Pyruvate dehydrogenase complex E3 subunit; Short=E3; Short=PDC-E3; Flags:
	novel.1223		ALDH3H1	ath00010/ath00620/ath00770/ath00410/ath00561/ath00310/ath00071/ath00280/ath00340/ath00380/ath00330/ath00053	Glycolysis / Gluconeogenesis/Pyruvate metabolism/Pantothenate and CoA biosynthesis/beta-Alanine metabolism/Glycerolipid metabolism/Lysine degradation/Fatty acid degradationc/Valine, leucine and isoleucine degradation/Histidine metabolism/Tryptophan metabolism/Arginine and proline metabolism/Ascorbate and aldarate metabolism	29	3.33333	4.11645	0.516427	-2.98865	0.00867066	- && Q70DU8.2 RecName: Full=Aldehyde dehydrogenase family 3 member H1; Short=AtALDH4; Short=Ath-ALDH4 && PF00171:Aldehyde dehydrogenase family
	novel.142		AAE7	ath01200/ath00010/ath03010/ath00630/ath00650	Carbon metabolism/Glycolysis / GluconeogenesisRibosome/Glyoxylate and dicarboxylate metabolism/Butanoate metabolism	387	222.333	36.5178	23.1346	-0.658467	0.0273506	- && Q8VZF1.1 RecName: Full=Acetate/butyrate--CoA ligase AAE7, peroxisomal; AltName: Full=AMP-binding protein 7; Short=AtAMPBP7; AltName: Full=Acetyl-CoA synthetase; AltName: Full=Acyl-activating enzyme 7; AltName: Full=Butyryl-CoA synthetase; AltName: Fu
	novel.445		ALDH3H1	ath00010/ath00620/ath00770/ath00410/ath00561/ath00310/ath00071/ath00280/ath00340/ath00380/ath00330/ath00053	Glycolysis / Gluconeogenesis/Pyruvate metabolism/Pantothenate and CoA biosynthesis/beta-Alanine metabolism/Glycerolipid metabolism/Lysine degradation/Fatty acid degradationc/Valine, leucine and isoleucine degradation/Histidine metabolism/Tryptophan metabolism/Arginine and proline metabolism/Ascorbate and aldarate metabolism	17	1.66667	2.06112	0.218771	-3.2214	0.00061875	- && Q70DU8.2 RecName: Full=Aldehyde dehydrogenase family 3 member H1; Short=AtALDH4; Short=Ath-ALDH4 && PF00171:Aldehyde dehydrogenase family
Carbon fixation in photosynthetic organisms (ath00710)	MS.gene69259		S17P	ath01200/ath00710	Carbon metabolism/Carbon fixation in photosynthetic organisms	193.667	391.333	21.2915	47.5634	1.15954	1.03094e-24	- && P46283.1 RecName: Full=Sedoheptulose-1,7-bisphosphatase, chloroplastic; AltName: Full=SED(1,7)P2ase; AltName: Full=Sedoheptulose bisphosphatase; Short=SBPase; Flags: Precursor && PF00316:Fructose-1-6-bisphosphatase
	novel.1006		GAPC1	ath01200/ath00010/ath01230/ath00710/ath00051/ath00030	Carbon metabolism/Glycolysis / Gluconeogenesis/Biosynthesis of amino acids/Carbon fixation in photosynthetic organisms/Fructose and mannose metabolism/Pentose phosphate pathway	0.333333	2524	0.026666	225.575	12.9217	0.00454505	- && P34922.1 RecName: Full=Glyceraldehyde-3-phosphate dehydrogenase, cytosolic && PF00044:Glyceraldehyde 3-phosphate dehydrogenase, NAD binding domain
	novel.7591		GAPC1	ath01200/ath00010/ath01230/ath00710	Carbon metabolism/Glycolysis / Gluconeogenesis/Biosynthesis of amino acids/Carbon fixation in photosynthetic organisms	2	52.6667	0.192315	5.53817	4.8481	5.85238e-21	- && P34922.1 RecName: Full=Glyceraldehyde-3-phosphate dehydrogenase, cytosolic && PF00044:Glyceraldehyde 3-phosphate dehydrogenase, NAD binding domain
	novel.7088		GAPC1	ath01200/ath00010/ath01230/ath00710	Carbon metabolism/Glycolysis / Gluconeogenesis/Biosynthesis of amino acids/Carbon fixation in photosynthetic organisms	0	7.66667	0	0.784356	5.51258	1.33891e-06	- && P34922.1 RecName: Full=Glyceraldehyde-3-phosphate dehydrogenase, cytosolic && PF00044:Glyceraldehyde 3-phosphate dehydrogenase, NAD binding domain
	MS.gene024581		RPI3	ath01200/ath00030/ath01230/ath00710	Carbon metabolism/Pentose phosphate pathway/Biosynthesis of amino acids/Carbon fixation in photosynthetic organisms	58	464	8.81487	77.7509	3.14155	0.0384848	- && Q9S726.1 RecName: Full=Probable ribose-5-phosphate isomerase 3, chloroplastic; AltName: Full=Phosphoriboisomerase 3; AltName: Full=Protein EMBRYO DEFECTIVE 3119; Flags: Precursor && PF06026:Ribose 5-phosphate isomerase A (phosphoriboisomerase A)
	MS.gene00079		RPL6	ath01200/ath00030/ath01230/ath00710	Carbon metabolism/Pentose phosphate pathway/Biosynthesis of amino acids/Carbon fixation in photosynthetic organisms	4	38	0.263831	2.77988	3.39232	0.0102756	- && O23049.1 RecName: Full=50S ribosomal protein L6, chloroplastic; AltName: Full=Protein EMBRYO DEFECTIVE 2394; Flags: Precursor && PF00347:Ribosomal protein L6
	MS.gene031593		ASP1	ath01200/ath01210/ath01230/ath00710/ath00030/ath00270	Carbon metabolism/2-Oxocarboxylic acid metabolism/Biosynthesis of amino acids/Carbon fixation in photosynthetic organisms/Pentose phosphate pathway/Cysteine and methionine metabolism	43.3333	125.667	4.36947	14.0179	1.68213	2.19018e-08	- && P46643.1 RecName: Full=Aspartate aminotransferase, mitochondrial; AltName: Full=Transaminase A; Flags: Precursor && PF00155:Aminotransferase class I and II
	MS.gene053394		mMDH	ath01200/ath00620/ath00710/ath00630/ath00020/ath00270	Carbon metabolism/Pyruvate metabolism/Carbon fixation in photosynthetic organisms/Glyoxylate and dicarboxylate metabolism/Citrate cycle (TCA cycle)/Cysteine and methionine metabolism	1163.33	3946.33	148.633	553.593	1.89708	3.65703e-05	- && O48905.1 RecName: Full=Malate dehydrogenase, cytoplasmic && -
	MS.gene051024		ALAAT2	ath01200/ath01210/ath01230/ath00710/ath00030/ath00270	Carbon metabolism/2-Oxocarboxylic acid metabolism/Biosynthesis of amino acids/Carbon fixation in photosynthetic organisms/Pentose phosphate pathway/Cysteine and methionine metabolism	19.3333	161	1.56217	14.2886	3.1923	4.40085e-14	- && Q9LDV4.1 RecName: Full=Alanine aminotransferase 2, mitochondrial; Short=AtAlaAT2; Short=AtAlaATm; AltName: Full=Alanine-2-oxoglutarate aminotransferase 3; Flags: Precursor && PF00155:Aminotransferase class I and II
	MS.gene51927		GAPA	ath01200/ath00710	Carbon metabolism/Carbon fixation in photosynthetic organisms	178.333	7.33333	18.7787	0.838259	-4.4751	1.166e-15	- && P12858.2 RecName: Full=Glyceraldehyde-3-phosphate dehydrogenase A, chloroplastic; AltName: Full=NADP-dependent glyceraldehydephosphate dehydrogenase subunit A; Flags: Precursor && PF00044:Glyceraldehyde 3-phosphate dehydrogenase, NAD binding domain|P
	MS.gene045741		GAPCP1	ath01200/ath00010/ath01230/ath00710/ath00051/ath00030	Carbon metabolism/Glycolysis / Gluconeogenesis/Biosynthesis of amino acids/Carbon fixation in photosynthetic organisms/Fructose and mannose metabolism/Pentose phosphate pathway	156	0	9.03666	0	-9.58316	1.24465e-14	- && Q9SAJ6.1 RecName: Full=Glyceraldehyde-3-phosphate dehydrogenase GAPCP1, chloroplastic; AltName: Full=Glyceraldehyde-3-phosphate dehydrogenase of plastid 1; AltName: Full=NAD-dependent glyceraldehydephosphate dehydrogenase chloroplastic 1; Flags: Prec
	novel.5996		GAPC1	ath01200/ath00010/ath01230/ath00710	Carbon metabolism/Glycolysis / Gluconeogenesis/Biosynthesis of amino acids/Carbon fixation in photosynthetic organisms	278.333	0	22.9837	0	-10.4177	0.00201711	- && P34922.1 RecName: Full=Glyceraldehyde-3-phosphate dehydrogenase, cytosolic && -
	novel.8306		GAPC1	ath01200/ath00010/ath01230/ath00710	Carbon metabolism/Glycolysis / Gluconeogenesis/Biosynthesis of amino acids/Carbon fixation in photosynthetic organisms	202.667	0	16.6467	0	-9.96339	2.90727e-88	- && P34922.1 RecName: Full=Glyceraldehyde-3-phosphate dehydrogenase, cytosolic && PF00044:Glyceraldehyde 3-phosphate dehydrogenase, NAD binding domain
	MS.gene074525		TRMB	ath01200/ath00010/ath01230/ath00710	Carbon metabolism/Glycolysis / Gluconeogenesis/Biosynthesis of amino acids/Carbon fixation in photosynthetic organisms	12	0.333333	0.674973	0.0203543	-4.9229	6.0304e-06	- && B0JUK5.1 RecName: Full=tRNA (guanine-N(7)-)-methyltransferase; AltName: Full=tRNA (guanine(46)-N(7))-methyltransferase; AltName: Full=tRNA(m7G46)-methyltransferase && PF02390:Putative methyltransferase|PF00162:Phosphoglycerate kinase
	MS.gene76540		NADP-ME4	ath01200/ath00620/ath00710	Carbon metabolism/Pyruvate metabolism/Carbon fixation in photosynthetic organisms	286.333	38.6667	19.7564	2.91713	-2.75838	0.0332061	- && Q9CA83.1 RecName: Full=NADP-dependent malic enzyme 4, chloroplastic; Short=AtNADP-ME4; Short=NADP-malic enzyme 4; Flags: Precursor && PF03949:Malic enzyme, NAD binding domain|PF00390:Malic enzyme, N-terminal domain
	MS.gene43245		ME1	ath01200/ath00620/ath00710	Carbon metabolism/Pyruvate metabolism/Carbon fixation in photosynthetic organisms	8	0	0.858378	0	-5.3035	0.000162646	- && P12628.1 RecName: Full=NADP-dependent malic enzyme; Short=NADP-ME && PF00390:Malic enzyme, N-terminal domain|PF03949:Malic enzyme, NAD binding domain
Pyruvate metabolism (ath00620)	MS.gene049916		GLX2-2	ath00620	Pyruvate metabolism	2	22	0.443815	5.33495	3.59348	8.75684e-09	- && O24496.2 RecName: Full=Hydroxyacylglutathione hydrolase cytoplasmic; AltName: Full=Glyoxalase II; Short=Glx II && PF16123:Hydroxyacylglutathione hydrolase C-terminus
	MS.gene68025		PKP2	ath01200/ath00010/ath01230/ath00230/ath00620	Carbon metabolism/Glycolysis / Gluconeogenesis/Biosynthesis of amino acids/Purine metabolism/Pyruvate metabolism	3	14.6667	0.445147	2.41689	2.43979	2.37995e-05	- && Q9FLW9.1 RecName: Full=Plastidial pyruvate kinase 2; Short=PKp2; AltName: Full=Plastidial pyruvate kinase 1; Short=PKP1; AltName: Full=Pyruvate kinase III; AltName: Full=Pyruvate kinase isozyme B1, chloroplastic; Short=PKP-BETA1; Short=Plastidic pyru
	MS.gene62562		LPD2	ath01200/ath00020/ath00010/ath00620	Carbon metabolism/Citrate cycle (TCA cycle)/Glycolysis / Gluconeogenesis/Pyruvate metabolism	0.333333	24	0.0321831	2.59678	6.20938	0.0072737	- && F4JLP5.2 RecName: Full=Dihydrolipoyl dehydrogenase 2, chloroplastic; Short=ptLPD2; AltName: Full=Dihydrolipoamide dehydrogenase 2; AltName: Full=Protein LIPOAMIDE DEHYDROGENASE 2; AltName: Full=Pyruvate dehydrogenase complex E3 subunit 2; Short=E3-2;
	MS.gene71850		LTA2	ath01200/ath00010/ath00620/ath00020/ath00260/ath00640/ath00310/ath00380	Carbon metabolism/Glycolysis / Gluconeogenesis/Pyruvate metabolism/Citrate cycle (TCA cycle)/Glycine, serine and threonine metabolism/ath00640/Lysine degradation/Tryptophan metabolism	38.3333	126.667	3.50725	12.7025	1.85683	0.000641757	- && Q9SQI8.1 RecName: Full=Dihydrolipoyllysine-residue acetyltransferase component 4 of pyruvate dehydrogenase complex, chloroplastic; AltName: Full=Dihydrolipoamide S-acetyltransferase component 4 of pyruvate dehydrogenase complex; AltName: Full=Pyruvat
	MS.gene33970		EMB3003	ath01200/ath00020	Carbon metabolism/Citrate cycle (TCA cycle)	118.667	197.667	11.0116	20.2541	0.87893	0.0107943	- && Q9C8P0.1 RecName: Full=Dihydrolipoyllysine-residue acetyltransferase component 5 of pyruvate dehydrogenase complex, chloroplastic; AltName: Full=Dihydrolipoamide S-acetyltransferase component 5 of pyruvate dehydrogenase complex; AltName: Full=Protein
	MS.gene07846		ODP22	ath01200/ath00020/ath00010/ath00620	Carbon metabolism/Citrate cycle (TCA cycle)/Glycolysis / Gluconeogenesis/Pyruvate metabolism	57	374.667	5.12062	37.8301	2.8844	3.20858e-05	- && Q8RWN9.2 RecName: Full=Dihydrolipoyllysine-residue acetyltransferase component 2 of pyruvate dehydrogenase complex, mitochondrial; AltName: Full=Dihydrolipoamide S-acetyltransferase component 2 of pyruvate dehydrogenase complex; AltName: Full=Pyruvat
	novel.515		LTA3	ath01200/ath00020/ath00010/ath00620	Carbon metabolism/Citrate cycle (TCA cycle)/Glycolysis / Gluconeogenesis/Pyruvate metabolism	85	143.333	19.6108	36.657	0.9016	2.19018e-08	- && Q0WQF7.2 RecName: Full=Dihydrolipoyllysine-residue acetyltransferase component 1 of pyruvate dehydrogenase complex, mitochondrial; AltName: Full=Dihydrolipoamide S-acetyltransferase component 1 of pyruvate dehydrogenase complex; AltName: Full=Pyruvat
	MS.gene053394		mMDH	ath01200/ath00620/ath00710/ath00630/ath00020/ath00270	Carbon metabolism/Pyruvate metabolism/Carbon fixation in photosynthetic organisms/Glyoxylate and dicarboxylate metabolism/Citrate cycle (TCA cycle)/Cysteine and methionine metabolism	1163.33	3946.33	148.633	553.593	1.89708	2.13881e-11	- && O48905.1 RecName: Full=Malate dehydrogenase, cytoplasmic && -
	MS.gene015780		LGUC	ath00620	Pyruvate metabolism	153	0.666667	22.82	0.107657	-7.70369	0.00529815	- && Q8W593.1 RecName: Full=Probable lactoylglutathione lyase, chloroplastic; AltName: Full=Glyoxalase I; Flags: Precursor && PF00903:Glyoxalase/Bleomycin resistance protein/Dioxygenase superfamily
	MS.gene034948		Os11g0148500	ath01200/ath00010/ath01230/ath00620/ath00230	Carbon metabolism/Glycolysis / Gluconeogenesis/Biosynthesis of amino acids/Pyruvate metabolism/Purine metabolism	301	116.333	24.2175	10.2544	-1.23908	4.93698e-13	- && Q2RAK2.1 RecName: Full=Pyruvate kinase 1, cytosolic; Short=OsPK1 >B8BJ39.1 RecName: Full=Pyruvate kinase 1, cytosolic; Short=OsPK1 && -
	MS.gene23056		DLD	ath00620	Pyruvate metabolism	174	4.33333	8.54381	0.232428	-5.18958	0.000138959	- && Q94AX4.1 RecName: Full=D-lactate dehydrogenase [cytochrome], mitochondrial; Short=AtD-LDH; AltName: Full=D-lactate ferricytochrome C oxidoreductase; AltName: Full=Glycolate deshydrogenase; Flags: Precursor && PF01565:FAD binding domain|PF02913:FAD li
	MS.gene08312		E1-BETA-2	ath01200/ath00010/ath00620	Carbon metabolism/Glycolysis / Gluconeogenesis/Pyruvate metabolism	27	2	2.83837	0.230066	-3.61664	0.0332061	- && O64688.1 RecName: Full=Pyruvate dehydrogenase E1 component subunit beta-3, chloroplastic; Flags: Precursor && PF02779:Transketolase, pyrimidine binding domain|PF02780:Transketolase, C-terminal domain
	MS.gene08518		PDH-E1 ALPHA	ath01200/ath00010/ath00620/ath00020	Carbon metabolism/Glycolysis / Gluconeogenesis/Pyruvate metabolism/Citrate cycle (TCA cycle)	309.667	63	30.8203	6.91507	-2.15585	6.0304e-06	- && O24457.1 RecName: Full=Pyruvate dehydrogenase E1 component subunit alpha-3, chloroplastic; Flags: Precursor && PF00676:Dehydrogenase E1 component
	MS.gene76540		NADP-ME4	ath01200/ath00620/ath00710	Carbon metabolism/Pyruvate metabolism/Carbon fixation in photosynthetic organisms	286.333	38.6667	19.7564	2.91713	-2.75838	3.84045e-05	- && Q9CA83.1 RecName: Full=NADP-dependent malic enzyme 4, chloroplastic; Short=AtNADP-ME4; Short=NADP-malic enzyme 4; Flags: Precursor && PF03949:Malic enzyme, NAD binding domain|PF00390:Malic enzyme, N-terminal domain
	MS.gene43245		ME1	ath01200/ath00620/ath00710	Carbon metabolism/Pyruvate metabolism/Carbon fixation in photosynthetic organisms	8	0	0.858378	0	-5.3035	0.0115632	- && P12628.1 RecName: Full=NADP-dependent malic enzyme; Short=NADP-ME && PF00390:Malic enzyme, N-terminal domain|PF03949:Malic enzyme, NAD binding domain
	MS.gene26810		LPD	ath01200/ath00010/ath00620/ath00020/ath00260/ath00640/ath00310/ath00380	Carbon metabolism/Glycolysis / Gluconeogenesis/Pyruvate metabolism/Citrate cycle (TCA cycle)/Glycine, serine and threonine metabolism/ath00640/Lysine degradation/Tryptophan metabolism	26.6667	0.333333	2.26155	0.0306326	-6.07726	0.0485071	- && P31023.2 RecName: Full=Dihydrolipoyl dehydrogenase, mitochondrial; AltName: Full=Dihydrolipoamide dehydrogenase; AltName: Full=Glycine cleavage system L protein; AltName: Full=Pyruvate dehydrogenase complex E3 subunit; Short=E3; Short=PDC-E3; Flags:
	MS.gene011262		ODP22	ath00010/ath00620/ath00020	Glycolysis / Gluconeogenesis/Pyruvate metabolism/Citrate cycle (TCA cycle)	529.667	271.333	41.5255	23.5551	-0.81833	0.049862	- && Q8RWN9.2 RecName: Full=Dihydrolipoyllysine-residue acetyltransferase component 2 of pyruvate dehydrogenase complex, mitochondrial; AltName: Full=Dihydrolipoamide S-acetyltransferase component 2 of pyruvate dehydrogenase complex; AltName: Full=Pyruvat
	MS.gene007924		cMDH	ath01200/ath00620/ath00710/ath00630/ath00020/ath00270	Carbon metabolism/Pyruvate metabolism/Carbon fixation in photosynthetic organisms/Glyoxylate and dicarboxylate metabolism/Citrate cycle (TCA cycle)/Cysteine and methionine metabolism	614.333	309.667	75.9593	41.9868	-0.854956	0.000389717	- && P17783.1 RecName: Full=Malate dehydrogenase, mitochondrial; Flags: Precursor && PF02866:lactate/malate dehydrogenase, alpha/beta C-terminal domain|PF00056:lactate/malate dehydrogenase, NAD binding domain
	novel.142		AAE7	ath01200/ath00010/ath03010/ath00630/ath00650	Carbon metabolism/Glycolysis / GluconeogenesisRibosome/Glyoxylate and dicarboxylate metabolism/Butanoate metabolism	387	222.333	36.5178	23.1346	-0.658467	0.00867066	- && Q8VZF1.1 RecName: Full=Acetate/butyrate--CoA ligase AAE7, peroxisomal; AltName: Full=AMP-binding protein 7; Short=AtAMPBP7; AltName: Full=Acetyl-CoA synthetase; AltName: Full=Acyl-activating enzyme 7; AltName: Full=Butyryl-CoA synthetase; AltName: Fu
	novel.1223		ALDH3H1	ath00010/ath00620/ath00770/ath00410/ath00561/ath00310/ath00071/ath00280/ath00340/ath00380/ath00330/ath00053	Glycolysis / Gluconeogenesis/Pyruvate metabolism/Pantothenate and CoA biosynthesis/beta-Alanine metabolism/Glycerolipid metabolism/Lysine degradation/Fatty acid degradationc/Valine, leucine and isoleucine degradation/Histidine metabolism/Tryptophan metabolism/Arginine and proline metabolism/Ascorbate and aldarate metabolism	29	3.33333	4.11645	0.516427	-2.98865	0.00321734	- && Q70DU8.2 RecName: Full=Aldehyde dehydrogenase family 3 member H1; Short=AtALDH4; Short=Ath-ALDH4 && PF00171:Aldehyde dehydrogenase family
	novel.445		ALDH3H1	ath00010/ath00620/ath00770/ath00410/ath00561/ath00310/ath00071/ath00280/ath00340/ath00380/ath00330/ath00053	Glycolysis / Gluconeogenesis/Pyruvate metabolism/Pantothenate and CoA biosynthesis/beta-Alanine metabolism/Glycerolipid metabolism/Lysine degradation/Fatty acid degradationc/Valine, leucine and isoleucine degradation/Histidine metabolism/Tryptophan metabolism/Arginine and proline metabolism/Ascorbate and aldarate metabolism	17	1.66667	2.06112	0.218771	-3.2214	0.000480986	- && Q70DU8.2 RecName: Full=Aldehyde dehydrogenase family 3 member H1; Short=AtALDH4; Short=Ath-ALDH4 && PF00171:Aldehyde dehydrogenase family
	MS.gene57887		AAT1	ath01200/ath00620/ath00630/ath01212/ath00310/ath00071/ath00280	Carbon metabolism/Pyruvate metabolism/Glyoxylate and dicarboxylate metabolism/Fatty acid metabolism/Lysine degradation/Fatty acid degradationc/Valine, leucine and isoleucine degradation	286.667	127.667	29.8986	14.714	-1.02309	0.00103665	- && Q8S4Y1.1 RecName: Full=Acetyl-CoA acetyltransferase, cytosolic 1; AltName: Full=Cytosolic acetoacetyl-CoA thiolase 1; Short=Thiolase 1; AltName: Full=Protein EMBRYO DEFECTIVE 1276 && PF00108:Thiolase, N-terminal domain|PF02803:Thiolase, C-terminal do
	MS.gene51144		BCCP1	ath01200ath00620/ath01212/ath00061	Carbon metabolism/Pyruvate metabolism/Fatty acid metabolism/Fatty acid biosynthesis	100.333	49	15.3654	8.2719	-0.892931	7.07929e-05	- && Q42533.2 RecName: Full=Biotin carboxyl carrier protein of acetyl-CoA carboxylase 1, chloroplastic; Short=AtBCCP1; Short=BCCP-1; Flags: Precursor && PF00364:Biotin-requiring enzyme
	MS.gene022510		ACC1	ath00620/ath01212/ath00061	Pyruvate metabolism/Fatty acid metabolism/Fatty acid biosynthesis	534.667	209	10.1117	4.32964	-1.22318	0.000335891	- && Q38970.1 RecName: Full=Acetyl-CoA carboxylase 1; Short=AtACC1; AltName: Full=Protein EMBRYO DEFECTIVE 22; AltName: Full=Protein GURKE; AltName: Full=Protein PASTICCINO 3; Includes: RecName: Full=Biotin carboxylase && PF00364:Biotin-requiring enzyme|P
	MS.gene93656		ACCA	ath00620/ath01212/ath00061	Pyruvate metabolism/Fatty acid metabolism/Fatty acid biosynthesis	126.667	39.6667	7.18512	2.47638	-1.53614	6.6796e-06	- && Q41008.1 RecName: Full=Acetyl-coenzyme A carboxylase carboxyl transferase subunit alpha, chloroplastic; Short=ACCase subunit alpha; Short=Acetyl-CoA carboxylase carboxyltransferase subunit alpha; AltName: Full=pIEP96; Flags: Precursor && PF03255:Acet
Starch and sucrose metabolism ( ath00500)	MS.gene71913		VCINV	ath00500/ath00052	Starch and sucrose metabolism/Galactose metabolism	742	2634	49.1284	190.9	1.95823	0.00129981	- && Q43857.1 RecName: Full=Acid beta-fructofuranosidase; AltName: Full=Acid invertase; Short=AI; AltName: Full=Acid sucrose hydrolase; AltName: Full=Vacuolar invertase; Flags: Precursor [Vicia faba] && PF11837:Domain of unknown function (DUF3357)|PF08244
	MS.gene95324		TPS6	ath00500	Starch and sucrose metabolism	19.3333	87.6667	0.965565	4.78268	2.31065	6.17865e-45	- && Q94AH8.2 RecName: Full=Alpha,alpha-trehalose-phosphate synthase [UDP-forming] 6; AltName: Full=Trehalose-6-phosphate synthase 6; Short=AtTPS6 && PF02358:Trehalose-phosphatase|PF00982:Glycosyltransferase family 20
	MS.gene21950		HXK3	ath01200/ath00010/ath00051/ath00520/ath00500/ath00052	Carbon metabolism/Gluconeogenesis/Fructose and mannose metabolism/Amino sugar and nucleotide sugar metabolism/Starch and sucrose metabolism/Galactose metabolism	90	190	7.7119	17.8685	1.21276	4.12442e-06	- && Q9LPS1.1 RecName: Full=Hexokinase-3 && PF03727:Hexokinase|PF00349:Hexokinase
	MS.gene85276		SCRK4	ath00520/ath00500/ath00051	Amino sugar and nucleotide sugar metabolism/Starch and sucrose metabolism/Fructose and mannose metabolism	17.6667	753.667	2.28245	107.263	5.55499	5.43027e-05	- && Q9M1B9.1 RecName: Full=Probable fructokinase-4 && PF00294:pfkB family carbohydrate kinase
	MS.gene86318		E135	ath00500	Starch and sucrose metabolism	5	45.3333	0.459825	4.58395	3.3214	7.46255e-25	- && Q9M088.1 RecName: Full=Glucan endo-1,3-beta-glucosidase 5; AltName: Full=(1->3)-beta-glucan endohydrolase 5; Short=(1->3)-beta-glucanase 5; AltName: Full=Beta-1,3-endoglucanase 5; Short=Beta-1,3-glucanase 5; Flags: Precursor && PF00332:Glycosyl hydro
	MS.gene77492		E134	ath00500	Starch and sucrose metabolism	6	35	0.514061	3.31021	2.68767	1.94145e-09	- && Q94CD8.1 RecName: Full=Glucan endo-1,3-beta-glucosidase 4; AltName: Full=(1->3)-beta-glucan endohydrolase 4; Short=(1->3)-beta-glucanase 4; AltName: Full=Beta-1,3-endoglucanase 4; Short=Beta-1,3-glucanase 4; Flags: Precursor && PF00332:Glycosyl hydro
	MS.gene40443		BAM1	ath00500	Starch and sucrose metabolism	85.6667	1079	6.3546	88.4187	3.79839	0.0352563	- && Q9LIR6.1 RecName: Full=Beta-amylase 1, chloroplastic; AltName: Full=1,4-alpha-D-glucan maltohydrolase; AltName: Full=Beta-amylase 7; AltName: Full=Thioredoxin-regulated beta-amylase; Short=TR-BAMY; Flags: Precursor && PF01373:Glycosyl hydrolase famil
	MS.gene72386		BAM3	ath00500	Starch and sucrose metabolism	6	90	0.463281	7.6713	4.04555	2.13296e-43	- && O23553.3 RecName: Full=Beta-amylase 3, chloroplastic; AltName: Full=1,4-alpha-D-glucan maltohydrolase; AltName: Full=Beta-amylase 8; AltName: Full=Chloroplast beta-amylase; Short=CT-BMY; Flags: Precursor && PF01373:Glycosyl hydrolase family 14
	MS.gene006777		BGLU41	ath00940/ath00460/ath00500	Phenylpropanoid biosynthesis/Cyanoamino acid metabolism/Starch and sucrose metabolism	2	12.3333	0.176224	1.20997	2.77654	7.18788e-09	- && Q9FIU7.2 RecName: Full=Putative beta-glucosidase 41; Short=AtBGLU41; Flags: Precursor && PF00232:Glycosyl hydrolase family 1
	MS.gene58913		BGLU44	ath00940/ath00460/ath00500	Phenylpropanoid biosynthesis/Cyanoamino acid metabolism/Starch and sucrose metabolism	53.6667	1270.33	4.45202	115.501	4.69828	7.29496e-06	- && Q9LV33.1 RecName: Full=Beta-glucosidase 44; Short=AtBGLU44; Flags: Precursor && PF00232:Glycosyl hydrolase family 1
	novel.4452		BGLU11	ath00940/ath00460/ath00500	Phenylpropanoid biosynthesis/Cyanoamino acid metabolism/Starch and sucrose metabolism	0	48.3333	0	7.6777	8.17543	0.0422955	- && B3H5Q1.2 RecName: Full=Beta-glucosidase 11; Short=AtBGLU11; Flags: Precursor && PF00232:Glycosyl hydrolase family 1
	novel.7098		BGLU12	ath00940/ath00460/ath00500	Phenylpropanoid biosynthesis/Cyanoamino acid metabolism/Starch and sucrose metabolism	0	24.3333	0	4.91337	7.20592	1.4218e-29	- && B8AVF0.1 RecName: Full=Beta-glucosidase 12; Flags: Precursor && PF00232:Glycosyl hydrolase family 1
	novel.7097		BGLU7	ath00940/ath00460/ath00500	Phenylpropanoid biosynthesis/Cyanoamino acid metabolism/Starch and sucrose metabolism	0	4.33333	0	2.08849	4.71478	3.12795e-13	- && Q75I93.1 RecName: Full=Beta-glucosidase 7; Short=Os3bglu7; Flags: Precursor && PF00232:Glycosyl hydrolase family 1
	MS.gene06066		EBS	ath00500	Starch and sucrose metabolism	16	270.333	1.08273	20.2397	4.22269	9.55404e-09	- && F4JL28.1 RecName: Full=Chromatin remodeling protein EBS; AltName: Full=Protein EARLY BOLTING IN SHORT DAYS && -
	MS.gene51667		CEL3	ath00500	Starch and sucrose metabolism	0	128.667	0	14.3873	9.58768	1.27737e-05	- && Q9C9H5.1 RecName: Full=Endoglucanase 9; AltName: Full=Cellulase 3; Short=AtCEL3; AltName: Full=Endo-1,4-beta glucanase 9; Flags: Precursor && PF00759:Glycosyl hydrolase family 9
	novel.6914		GUN17	ath00500	Starch and sucrose metabolism	17.3333	115.333	1.48449	10.9672	2.88307	0.0279647	- && O81416.1 RecName: Full=Endoglucanase 17; AltName: Full=Endo-1,4-beta glucanase 17; Flags: Precursor && -
	novel.6022		GLU8	ath00500	Starch and sucrose metabolism	43.6667	185.333	2.6936	12.7471	2.24176	0.000681401	- && Q8LQ92.1 RecName: Full=Endoglucanase 3; AltName: Full=Endo-1,4-beta glucanase 3; AltName: Full=OsGLU8; Flags: Precursor && -
	MS.gene028324		SS4	ath00500	Starch and sucrose metabolism	67.6667	115.333	2.93105	5.48554	0.905235	1.71971e-10	- && Q0WVX5.1 RecName: Full=Probable starch synthase 4, chloroplastic/amyloplastic; Short=AtSS4; AltName: Full=Soluble starch synthase IV; Flags: Precursor && PF08323:Starch synthase catalytic domain|PF00534:Glycosyl transferases group 1
	MS.gene06919		SS1	ath00500	Starch and sucrose metabolism	17	101.333	1.11102	7.23102	2.70255	1.90816e-05	- && Q9FNF2.1 RecName: Full=Starch synthase 1, chloroplastic/amyloplastic; Short=AtSS1; Short=SSS; AltName: Full=Soluble starch synthase I; Flags: Precursor && PF08323:Starch synthase catalytic domain|PF00534:Glycosyl transferases group 1
	MS.gene62861		NUDT14	ath00230/ath00051/ath00500	Purine metabolism/Fructose and mannose metabolism/Starch and sucrose metabolism	14.6667	118.333	2.03253	18.0978	3.15534	2.16544e-10	- && Q9SZ63.2 RecName: Full=Nudix hydrolase 14, chloroplastic; Short=AtNUDT14; AltName: Full=ADP-sugar diphosphatase; Short=AtASPP; Flags: Precursor && PF00293:NUDIX domain
	MS.gene21950		HXK3	ath01200/ath00010/ath00051/ath00520/ath00500/ath00052	Carbon metabolism/Gluconeogenesis/Fructose and mannose metabolism/Amino sugar and nucleotide sugar metabolism/Starch and sucrose metabolism/Galactose metabolism	90	190	7.7119	17.8685	1.21276	0.00129981	- && Q9LPS1.1 RecName: Full=Hexokinase-3 && PF03727:Hexokinase|PF00349:Hexokinase
	MS.gene048421		HXK3	ath00500	Starch and sucrose metabolism	20.3333	0	1.22936	0	-6.64686	0.00127357	- && Q9LRA7.1 RecName: Full=Probable alpha,alpha-trehalose-phosphate synthase [UDP-forming] 9; AltName: Full=Trehalose-6-phosphate synthase 9; Short=AtTPS9 && PF02358:Trehalose-phosphatase|PF00982:Glycosyltransferase family 20
	MS.gene29837		TPPJ	ath00500	Starch and sucrose metabolism	168.333	1.66667	19.526	0.211043	-6.52625	4.06471e-12	- && Q5HZ05.1 RecName: Full=Probable trehalose-phosphate phosphatase J; Short=AtTPPJ; AltName: Full=Trehalose 6-phosphate phosphatase && -
	MS.gene05152		UBP19	ath00500	Starch and sucrose metabolism	32.3333	4.33333	3.41989	0.512256	-2.74878	0.00217768	- && Q9SJA1.2 RecName: Full=Ubiquitin carboxyl-terminal hydrolase 19; AltName: Full=Deubiquitinating enzyme 19; Short=AtUBP19; AltName: Full=Ubiquitin thioesterase 19; AltName: Full=Ubiquitin-specific-processing protease 19 && PF08241:Methyltransferase do
	MS.gene25398		AMY3	ath00500	Starch and sucrose metabolism	688	161	32.0082	8.27597	-1.95159	4.87354e-10	- && Q94A41.1 RecName: Full=Alpha-amylase 3, chloroplastic; Short=AtAMY3; AltName: Full=1,4-alpha-D-glucan glucanohydrolase; Flags: Precursor && PF00128:Alpha amylase, catalytic domain|PF07821:Alpha-amylase C-terminal beta-sheet domain
	MS.gene005433		SCL14	ath00500	Starch and sucrose metabolism	35	2.33333	5.59851	0.401757	-3.7894	6.15495e-09	- && Q9XE58.2 RecName: Full=Scarecrow-like protein 14; Short=AtSCL14; AltName: Full=GRAS family protein 2; Short=AtGRAS-2 && PF01373:Glycosyl hydrolase family 14|PF03514:GRAS domain family
	novel.2307		BAM3	ath00500	Starch and sucrose metabolism	449.333	104.333	7.45026	1.91657	-1.95975	0.000176846	- && O23553.3 RecName: Full=Beta-amylase 3, chloroplastic; AltName: Full=1,4-alpha-D-glucan maltohydrolase; AltName: Full=Beta-amylase 8; AltName: Full=Chloroplast beta-amylase; Short=CT-BMY; Flags: Precursor && PF01373:Glycosyl hydrolase family 14
	MS.gene012650		E131	ath00500	Starch and sucrose metabolism	14.3333	0	1.17016	0	-6.14456	0.0202037	- && O65399.3 RecName: Full=Glucan endo-1,3-beta-glucosidase 1; AltName: Full=(1->3)-beta-glucan endohydrolase 1; Short=(1->3)-beta-glucanase 1; AltName: Full=Beta-1,3-endoglucanase 1; Short=Beta-1,3-glucanase 1; Flags: Precursor && PF07983:X8 domain|PF00
	MS.gene71411		SCRK7	ath00051/ath00520/ath00500	Fructose and mannose metabolism/Amino sugar and nucleotide sugar metabolism/Starch and sucrose metabolism	10	0	0.617633	0	-5.62092	1.93654e-06	- && Q9FLH8.1 RecName: Full=Probable fructokinase-7 && PF08585:RecQ mediated genome instability protein|PF00294:pfkB family carbohydrate kinase
	MS.gene66419		HXK1	ath01200/ath00010/ath00051/ath00520/ath00500/ath00052	Carbon metabolism/Gluconeogenesis/Fructose and mannose metabolism/Amino sugar and nucleotide sugar metabolism/Starch and sucrose metabolism/Galactose metabolism	65.6667	29	7.70109	3.74225	-1.0404	0.00884705	- && Q9SEK3.1 RecName: Full=Hexokinase-1; AltName: Full=SoHxK1 && PF00349:Hexokinase|PF03727:Hexokinase
	MS.gene27072		HXK2	ath01200/ath00010/ath00051/ath00520/ath00500/ath00052	Carbon metabolism/Gluconeogenesis/Fructose and mannose metabolism/Amino sugar and nucleotide sugar metabolism/Starch and sucrose metabolism/Galactose metabolism	326.667	106.667	33.4507	12.107	-1.46721	5.87067e-48	- && Q6Q8A5.1 RecName: Full=Hexokinase-2, chloroplastic; AltName: Full=NtHxK2; Flags: Precursor && PF00349:Hexokinase|PF03727:Hexokinase
	MS.gene04049		BACOVA_02659	ath00940/ath00460/ath00500	Phenylpropanoid biosynthesis/Cyanoamino acid metabolism/Starch and sucrose metabolism	9.66667	0.333333	0.680365	0.0255103	-4.60896	0.00298897	- && A7LXU3.1 RecName: Full=Beta-glucosidase BoGH3B; AltName: Full=Glycosyl hydrolase family protein 3B; Short=BoGH3B; Flags: Precursor && PF00933:Glycosyl hydrolase family 3 N terminal domain|PF01915:Glycosyl hydrolase family 3 C-terminal domain
	MS.gene33530		BGLU46	ath00940/ath00460/ath00500	Phenylpropanoid biosynthesis/Cyanoamino acid metabolism/Starch and sucrose metabolism	769	29.3333	34.0391	1.42992	-4.573	2.73268e-10	- && O80690.2 RecName: Full=Beta-glucosidase 46; Short=AtBGLU46; Flags: Precursor && PF00232:Glycosyl hydrolase family 1
	novel.1986		GUN17	ath00500	Starch and sucrose metabolism	74.3333	0	9.63528	0	-8.51368	4.06471e-12	- && O81416.1 RecName: Full=Endoglucanase 17; AltName: Full=Endo-1,4-beta glucanase 17; Flags: Precursor && -
	MS.gene33534		ADG2	ath00520/ath00500	Amino sugar and nucleotide sugar metabolism/Starch and sucrose metabolism	88.3333	0.666667	7.22435	0.0589842	-6.91297	4.87354e-10	- && P55229.3 RecName: Full=Glucose-1-phosphate adenylyltransferase large subunit 1, chloroplastic; AltName: Full=ADP-glucose pyrophosphorylase; AltName: Full=ADP-glucose synthase; AltName: Full=AGPase S; AltName: Full=Alpha-D-glucose-1-phosphate adenyl t
Phenylpropanoid biosynthesis (ath00940)	MS.gene98039		CYP73A3	ath00941/ath00940/ath00130/ath00941	Flavonoid biosynthesis/Phenylpropanoid biosynthesis/Ubiquinone and other terpenoid-quinone biosynthesis/Flavonoid biosynthesis	1737.33	4722	145.478	437.551	1.58862	0.0384478	- && P37114.1 RecName: Full=Trans-cinnamate 4-monooxygenase; AltName: Full=Cinnamic acid 4-hydroxylase; Short=C4H; Short=CA4H; AltName: Full=Cytochrome P450 73; AltName: Full=Cytochrome P450C4H && PF00067:Cytochrome P450
	MS.gene30425		CAMT3	ath00941/ath00940	Flavonoid biosynthesis/Phenylpropanoid biosynthesis	0	14.6667	0	3.63897	6.44914	0.00038761	- && Q9C5D7.1 RecName: Full=Probable caffeoyl-CoA O-methyltransferase At4g26220; AltName: Full=Trans-caffeoyl-CoA 3-O-methyltransferase; Short=CCoAMT; Short=CCoAOMT && PF01596:O-methyltransferase
	MS.gene034244		CCR2	ath00940	Phenylpropanoid biosynthesis	28.3333	61	3.57759	8.47866	1.24504	0.0352563	- && Q9SAH9.1 RecName: Full=Cinnamoyl-CoA reductase 2; Short=AtCCR2 && PF01370:NAD dependent epimerase/dehydratase family
	MS.gene71681		CAD2	ath00940	Phenylpropanoid biosynthesis	859.667	1775	102.069	231.323	1.18044	2.13296e-43	- && P31656.1 RecName: Full=Probable cinnamyl alcohol dehydrogenase; Short=CAD && PF00107:Zinc-binding dehydrogenase|PF08240:Alcohol dehydrogenase GroES-like domain
	MS.gene006777		BGLU41	ath00940/ath00460/ath00500	Phenylpropanoid biosynthesis/Cyanoamino acid metabolism/Starch and sucrose metabolism	2	12.3333	0.176224	1.20997	2.77654	7.18788e-09	- && Q9FIU7.2 RecName: Full=Putative beta-glucosidase 41; Short=AtBGLU41; Flags: Precursor && PF00232:Glycosyl hydrolase family 1
	MS.gene58913		BGLU44	ath00940/ath00460/ath00500	Phenylpropanoid biosynthesis/Cyanoamino acid metabolism/Starch and sucrose metabolism	53.6667	1270.33	4.45202	115.501	4.69828	7.29496e-06	- && Q9LV33.1 RecName: Full=Beta-glucosidase 44; Short=AtBGLU44; Flags: Precursor && PF00232:Glycosyl hydrolase family 1
	novel.4452		BGLU11	ath00940/ath00460/ath00500	Phenylpropanoid biosynthesis/Cyanoamino acid metabolism/Starch and sucrose metabolism	0	48.3333	0	7.6777	8.17543	0.0422955	- && B3H5Q1.2 RecName: Full=Beta-glucosidase 11; Short=AtBGLU11; Flags: Precursor && PF00232:Glycosyl hydrolase family 1
	novel.7098		BGLU12	ath00940/ath00460/ath00500	Phenylpropanoid biosynthesis/Cyanoamino acid metabolism/Starch and sucrose metabolism	0	24.3333	0	4.91337	7.20592	3.61155e-07	- && B8AVF0.1 RecName: Full=Beta-glucosidase 12; Flags: Precursor && PF00232:Glycosyl hydrolase family 1
	novel.7097		BGLU7	ath00940/ath00460/ath00500	Phenylpropanoid biosynthesis/Cyanoamino acid metabolism/Starch and sucrose metabolism	0	4.33333	0	2.08849	4.71478	2.3328e-05	- && Q75I93.1 RecName: Full=Beta-glucosidase 7; Short=Os3bglu7; Flags: Precursor && PF00232:Glycosyl hydrolase family 1
	MS.gene070268		PER16	ath00940	Phenylpropanoid biosynthesis	1.66667	59	0.217664	8.56999	5.29303	3.10521e-24	- && Q96518.2 RecName: Full=Peroxidase 16; Short=Atperox P16; AltName: Full=ATP22a; Flags: Precursor && -
	MS.gene67694		PER64	ath00940	Phenylpropanoid biosynthesis	0	16.6667	0	2.46275	6.63903	0.949677	- && Q43872.1 RecName: Full=Peroxidase 64; Short=Atperox P64; AltName: Full=ATP17a; AltName: Full=PRXR4; Flags: Precursor && PF00141:Peroxidase
	MS.gene57204		PER51	ath00940	Phenylpropanoid biosynthesis	77.3333	1098.67	9.97938	157.977	3.98395	9.84188e-05	- && Q9SZE7.1 RecName: Full=Peroxidase 51; Short=Atperox P51; AltName: Full=ATP37; Flags: Precursor && PF00141:Peroxidase
	novel.897		PER47	ath00940	Phenylpropanoid biosynthesis	210.333	185.667	54.4152	52.9716	-0.0387123	1.29954e-05	- && Q9SZB9.2 RecName: Full=Peroxidase 47; Short=Atperox P47; AltName: Full=ATP32; Flags: Precursor && PF00141:Peroxidase
	MS.gene29407		F6H1	ath00940	Phenylpropanoid biosynthesis	27	1	4.53817	0.185792	-4.61069	1.54648e-06	- && Q9LHN8.1 RecName: Full=Feruloyl CoA ortho-hydroxylase 1 && PF14226:non-haem dioxygenase in morphine synthesis N-terminal
	MS.gene043591		4CLL7	ath00940/ath00130	Phenylpropanoid biosynthesis/Ubiquinone and other terpenoid-quinone biosynthesis	27.3333	0	4.96464	0	-7.07547	2.32743e-39	- && Q9M0X9.1 RecName: Full=4-coumarate--CoA ligase-like 7; AltName: Full=4-coumarate--CoA ligase isoform 6; Short=At4CL6 && PF00501:AMP-binding enzyme
	MS.gene070120		4CLL6	ath00940/ath00130	Phenylpropanoid biosynthesis/Ubiquinone and other terpenoid-quinone biosynthesis	8.33333	0	0.635896	0	-5.35395	1.84294e-08	- && Q84P24.2 RecName: Full=4-coumarate--CoA ligase-like 6; AltName: Full=4-coumarate--CoA ligase isoform 7; Short=At4CL7 && PF00501:AMP-binding enzyme|PF13193:AMP-binding enzyme C-terminal domain
	MS.gene017674		CYP98A2	ath00941/ath00940	Flavonoid biosynthesis/Phenylpropanoid biosynthesis	2638.67	93	220.085	8.53462	-4.68786	1.24733e-15	- && O48922.1 RecName: Full=Cytochrome P450 98A2 && PF00067:Cytochrome P450
	MS.gene028389		FAOMT	ath00941/ath00940	Flavonoid biosynthesis/Phenylpropanoid biosynthesis	49.3333	0	9.10665	0	-7.92037	0.00884705	- && C7AE94.1 RecName: Full=Flavonoid 3',5'-methyltransferase; AltName: Full=Anthocyanin-O-methyltransferase; Short=VvAOMT && PF01596:O-methyltransferase
	novel.5016		CAD	ath00940	Phenylpropanoid biosynthesis	129.667	2.33333	9.10035	0.183286	-5.64975	5.87067e-48	- && Q9ZRF1.1 RecName: Full=Probable mannitol dehydrogenase; AltName: Full=NAD-dependent mannitol dehydrogenase && PF00107:Zinc-binding dehydrogenase|PF08240:Alcohol dehydrogenase GroES-like domain
	MS.gene04049		BACOVA_02659	ath00940/ath00460/ath00500	Phenylpropanoid biosynthesis/Cyanoamino acid metabolism/Starch and sucrose metabolism	9.66667	0.333333	0.680365	0.0255103	-4.60896	1.56869e-08	- && A7LXU3.1 RecName: Full=Beta-glucosidase BoGH3B; AltName: Full=Glycosyl hydrolase family protein 3B; Short=BoGH3B; Flags: Precursor && PF00933:Glycosyl hydrolase family 3 N terminal domain|PF01915:Glycosyl hydrolase family 3 C-terminal domain
	MS.gene33530		BGLU46	ath00940/ath00460/ath00500	Phenylpropanoid biosynthesis/Cyanoamino acid metabolism/Starch and sucrose metabolism	769	29.3333	34.0391	1.42992	-4.573	8.78768e-09	- && O80690.2 RecName: Full=Beta-glucosidase 46; Short=AtBGLU46; Flags: Precursor && PF00232:Glycosyl hydrolase family 1
	MS.gene003286		POD	ath00940	Phenylpropanoid biosynthesis	761.667	161	92.0797	21.3294	-2.10971	4.57852e-06	- && Q9LEH3.1 RecName: Full=Peroxidase 15; Short=Prx15; AltName: Full=Anionic peroxidase; Flags: Precursor && PF00141:Peroxidase
	MS.gene073776		PER21	ath00940	Phenylpropanoid biosynthesis	57.3333	0	7.54392	0	-8.14682	0.0189261	- && Q42580.1 RecName: Full=Peroxidase 21; Short=Atperox P21; AltName: Full=ATP2a/ATP2b; AltName: Full=PRXR5; Flags: Precursor && PF00141:Peroxidase
	MS.gene44482		PER73	ath00940	Phenylpropanoid biosynthesis	305	87	40.1267	12.6581	-1.66504	6.24079e-05	- && Q43873.1 RecName: Full=Peroxidase 73; Short=Atperox P73; AltName: Full=ATP10a; AltName: Full=PRXR11; Flags: Precursor && PF00141:Peroxidase
	MS.gene009691		GSVIVT00023967001	ath00940	Phenylpropanoid biosynthesis	54.6667	18.3333	7.14192	2.64935	-1.43219	0.00845513	- && A7NY33.1 RecName: Full=Peroxidase 4; Flags: Precursor && PF00141:Peroxidase
	MS.gene03129		HTR4	ath00940	Phenylpropanoid biosynthesis	94	16.3333	13.8336	2.65492	-2.38135	1.03869e-06	- && P59169.2 RecName: Full=Histone H3.3; AltName: Full=Histone H3.2 >Q71V89.3 RecName: Full=Histone H3.3 >P69245.2 RecName: Full=Histone H3.3 >P69244.2 RecName: Full=Histone H3.3; AltName: Full=Histone H3.2; AltName: Full=Minor histone H3 >Q71H73.3 RecNa
	MS.gene060053		PER55	ath00940	Phenylpropanoid biosynthesis	43	1	5.71861	0.146517	-5.28696	3.06439e-14	- && Q96509.1 RecName: Full=Peroxidase 55; Short=Atperox P55; AltName: Full=ATP20a; Flags: Precursor && PF00141:Peroxidase
	MS.gene24236		PER9	ath00940	Phenylpropanoid biosynthesis	7.66667	0	0.92893	0	-5.22526	3.67649e-06	- && Q96512.1 RecName: Full=Peroxidase 9; Short=Atperox P9; AltName: Full=ATP18a; Flags: Precursor && -
	MS.gene02084		POD	ath00940	Phenylpropanoid biosynthesis	225.667	0	27.0232	0	-10.1194	0.000161765	- && Q9LEH3.1 RecName: Full=Peroxidase 15; Short=Prx15; AltName: Full=Anionic peroxidase; Flags: Precursor && PF00141:Peroxidase
Ribosome (ath03008)	MS.gene44023		RPS24A	ath03010	Ribosome	17.6667	685.667	5.42119	233.327	5.42411	4.64173e-41	- && Q9SS17.1 RecName: Full=40S ribosomal protein S24-1 && PF01282:Ribosomal protein S24e
	MS.gene042298		RPL29B	ath03010	Ribosome	15.3333	386	10.714	295.696	4.78721	3.0379e-30	- && Q84WM0.2 RecName: Full=60S ribosomal protein L29-2 && PF01779:Ribosomal L29e protein family
	MS.gene016301		RPL11	ath03010	Ribosome	21.3333	426.667	4.65238	102.647	4.46281	9.67867e-22	- && P46287.1 RecName: Full=60S ribosomal protein L11; AltName: Full=L5 && PF00281:Ribosomal protein L5|PF00673:ribosomal L5P family C-terminus
	MS.gene030863		RPP3A	ath03010	Ribosome	0	927	0	588.368	12.4399	3.31381e-17	- && Q9SVZ6.1 RecName: Full=60S acidic ribosomal protein P3-1 && -
	MS.gene023152		RPS14	ath03010	Ribosome	4.33333	172	1.21861	53.0894	5.44885	2.08917e-16	- && O22584.1 RecName: Full=40S ribosomal protein S14 && PF00411:Ribosomal protein S11
	MS.gene76031		RPL30	ath03010	Ribosome	35	284.667	16.1746	145.965	3.17283	1.14364e-14	- && O49884.1 RecName: Full=60S ribosomal protein L30 && PF01248:Ribosomal protein L7Ae/L30e/S12e/Gadd45 family
	MS.gene31405		RPL10	ath03010	Ribosome	395.667	1374.33	75.1685	287.778	1.93672	3.2382e-14	- && Q9M5M7.1 RecName: Full=60S ribosomal protein L10 && -
	MS.gene52105		RPL7AB	ath03010	Ribosome	0.333333	387.333	0.0541657	69.522	10.21	3.46964e-13	- && Q9LZH9.1 RecName: Full=60S ribosomal protein L7a-2 && PF01248:Ribosomal protein L7Ae/L30e/S12e/Gadd45 family
	MS.gene09204		RPL17A	ath03010	Ribosome	13.6667	339.333	3.3301	90.8785	4.76875	8.28757e-13	- && Q93VI3.1 RecName: Full=60S ribosomal protein L17-1 && PF00237:Ribosomal protein L22p/L17e
	novel.7309		RPL19A	ath03010	Ribosome	39.6667	211.667	6.83403	40.1575	2.55476	1.43232e-12	- && Q9SRX2.1 RecName: Full=60S ribosomal protein L19-1; AltName: Full=Protein EMBRYO DEFECTIVE 2386 && PF01280:Ribosomal protein L19e
	novel.7639		RPS3B	ath03010	Ribosome	1.66667	109.333	0.232788	16.9735	6.1831	3.8137e-11	- && Q9M339.1 RecName: Full=40S ribosomal protein S3-2 && -
	MS.gene34127		RPL38A	ath03010	Ribosome	0	131.667	0	88.9954	9.61448	4.99573e-10	- && O22860.1 RecName: Full=60S ribosomal protein L38 && -
	MS.gene67847		RPS1	ath03010	Ribosome	0.333333	131.333	0.0346651	14.7555	8.66185	3.08312e-09	- && P29344.1 RecName: Full=30S ribosomal protein S1, chloroplastic; AltName: Full=CS1; Flags: Precursor && PF00575:S1 RNA binding domain
	MS.gene072152		RPL28C	ath03010	Ribosome	484.667	1327	143.201	433.651	1.59837	3.3701e-09	- && Q9M0E2.1 RecName: Full=60S ribosomal protein L28-2 && PF01778:Ribosomal L28e protein family
	MS.gene036455		RPL35	ath03010	Ribosome	806.667	1893.67	278.918	723.077	1.37425	5.06908e-09	- && Q9M5L0.1 RecName: Full=60S ribosomal protein L35 && PF00831:Ribosomal L29 protein
	MS.gene20212		RPS6	ath03010	Ribosome	8.66667	75.3333	1.88363	18.1666	3.26897	1.81534e-08	- && Q8VY91.1 RecName: Full=30S ribosomal protein S6 alpha, chloroplastic; Flags: Precursor && PF01250:Ribosomal protein S6
	MS.gene07244		DDB_G0277003	ath03010	Ribosome	30	141	10.9751	57.0984	2.37772	1.24131e-07	- && Q86JB0.2 RecName: Full=Putative uncharacterized protein DDB_G0277003 && PF10294:Lysine methyltransferase
	MS.gene26005		RPL27AC	ath03010	Ribosome	75.6667	444.667	21.8181	139.887	2.68114	6.04084e-07	- && P49637.2 RecName: Full=60S ribosomal protein L27a-3 && PF00828:Ribosomal protein L18e/L15
	MS.gene023130		RPS15AA	ath03010	Ribosome	5.66667	54.6667	1.82922	19.544	3.41243	6.09302e-07	- && P42798.2 RecName: Full=40S ribosomal protein S15a-1 && PF00410:Ribosomal protein S8
	MS.gene026524		RPS2D	ath03010	Ribosome	508.333	1149.67	77.8316	193.783	1.31606	2.57578e-06	- && Q9SCM3.1 RecName: Full=40S ribosomal protein S2-4 && PF03719:Ribosomal protein S5, C-terminal domain|PF00333:Ribosomal protein S5, N-terminal domain
	MS.gene059875		RPL27	ath03010	Ribosome	0	26	0	11.1328	7.28759	1.39126e-05	- && Q05462.1 RecName: Full=60S ribosomal protein L27 && PF01777:Ribosomal L27e protein family
	MS.gene015407		RPL10A	ath03010	Ribosome	215	453.333	42.2652	98.1703	1.21607	1.92551e-05	- && B8B9K6.1 RecName: Full=60S ribosomal protein L10a >B7F845.1 RecName: Full=60S ribosomal protein L10a && PF00687:Ribosomal protein L1p/L10e family
	MS.gene053322		RPL28	ath03010	Ribosome	108	274.333	15.3327	43.2311	1.495	3.0729e-05	- && O22795.2 RecName: Full=50S ribosomal protein L28, chloroplastic; AltName: Full=CL28; Flags: Precursor && PF00830:Ribosomal L28 family|PF05056:Protein of unknown function (DUF674)
	MS.gene056170		RPL32A	ath03010	Ribosome	181	476	57.5849	167.754	1.54248	8.39563e-05	- && P49211.2 RecName: Full=60S ribosomal protein L32-1 && PF01655:Ribosomal protein L32
	MS.gene65076		RPL13AD	ath03010	Ribosome	515.333	983.333	106.01	223.148	1.0738	8.8694e-05	- && Q9FKC0.1 RecName: Full=60S ribosomal protein L13a-4 && PF00572:Ribosomal protein L13
	MS.gene61517		RPMJ	ath03010	Ribosome	58.3333	130.667	43.5835	108.028	1.309	9.46401e-05	- && Q035A6.1 RecName: Full=50S ribosomal protein L36 >B3WAJ5.1 RecName: Full=50S ribosomal protein L36 && PF00444:Ribosomal protein L36
	MS.gene021047		RPL35	ath03010	Ribosome	53	140	18.3902	53.7516	1.54734	0.000139348	- && Q9M5L0.1 RecName: Full=60S ribosomal protein L35 && PF00831:Ribosomal L29 protein
	novel.7930		RPL12	ath03010	Ribosome	104	238.333	10.6671	26.8604	1.33271	0.000222046	- && P02398.2 RecName: Full=50S ribosomal protein L12, chloroplastic; AltName: Full=CL12; Flags: Precursor && PF16320:Ribosomal protein L7/L12 dimerisation domain|PF00542:Ribosomal protein L7/L12 C-terminal domain
	MS.gene007018		RPL21E	ath03010	Ribosome	642	1111.33	165.64	316.485	0.934061	0.000269272	- && Q9FDZ9.1 RecName: Full=60S ribosomal protein L21-2 && PF01157:Ribosomal protein L21e
	MS.gene29105		RPS13	ath03010	Ribosome	141.333	304.333	35.9811	85.7166	1.252	0.000310928	- && P42732.1 RecName: Full=30S ribosomal protein S13, chloroplastic; AltName: Full=CS13; Flags: Precursor && PF00416:Ribosomal protein S13/S18
	novel.5691		RPL-2	ath03010	Ribosome	0.666667	21	0.0993707	3.36164	5.10688	0.000396429	- && Q9XVF7.1 RecName: Full=60S ribosomal protein L8 && -
	novel.8341		RPS30A	ath03010	Ribosome	41	107.667	7.52868	21.6892	1.52734	0.000472017	- && P49689.3 RecName: Full=40S ribosomal protein S30 && PF04758:Ribosomal protein S30
	MS.gene33305		RPLV	ath03010	Ribosome	46.3333	124	5.97013	17.577	1.55838	0.000574515	- && Q98N52.1 RecName: Full=50S ribosomal protein L22 && -
	MS.gene28588		RPS3B	ath03010	Ribosome	0.666667	17.3333	0.432042	12.4984	4.84188	0.000769624	- && Q9M339.1 RecName: Full=40S ribosomal protein S3-2 && PF00189:Ribosomal protein S3, C-terminal domain
	MS.gene068125		RPL27AB	ath03010	Ribosome	0.333333	13.6667	0.0939572	4.32707	5.39987	0.00136622	- && Q9LR33.1 RecName: Full=60S ribosomal protein L27a-2 && PF00828:Ribosomal protein L18e/L15
	novel.4680		RPLT	ath03010	Ribosome	9	39	1.45873	6.92937	2.25104	0.00157155	- && B6IPJ8.1 RecName: Full=50S ribosomal protein L20 && PF00453:Ribosomal protein L20
	novel.6820		RPS21	ath03010	Ribosome	0	8.66667	0	1.46957	5.6991	0.00299284	- && P35687.1 RecName: Full=40S ribosomal protein S21 && PF01249:Ribosomal protein S21e
	MS.gene060761		RPLR	ath03010	Ribosome	12.6667	46	2.74131	11.0207	2.00705	0.00340748	- && B1XSR7.1 RecName: Full=50S ribosomal protein L18 && -
	MS.gene032337		RPL13	ath03010	Ribosome	20.3333	60.3333	3.39038	11.101	1.71161	0.00520442	- && Q9SYL9.1 RecName: Full=50S ribosomal protein L13, chloroplastic; AltName: Full=CL13; AltName: Full=Protein EMBRYO DEFECTIVE 1473; Flags: Precursor && PF00572:Ribosomal protein L13
	MS.gene068325		RPSQ	ath03010	Ribosome	0.666667	27	0.449337	19.588	5.45271	0.0160962	- && A1ALV0.1 RecName: Full=30S ribosomal protein S17 && PF00366:Ribosomal protein S17
	MS.gene72382		RPL37A	ath03010	Ribosome	57.6667	223	26.3578	114.908	2.12363	0.0185988	- && Q9XHE4.1 RecName: Full=60S ribosomal protein L37a && PF01780:Ribosomal L37ae protein family
	MS.gene015430		RPS30A	ath03010	Ribosome	228.667	384.667	93.4556	173.017	0.888625	0.0226144	- && P49689.3 RecName: Full=40S ribosomal protein S30 && PF04758:Ribosomal protein S30
	MS.gene55896		RPIL	ath03010	Ribosome	26.3333	58.3333	7.06625	17.3911	1.29847	0.0234865	- && Q31CY0.1 RecName: Full=50S ribosomal protein L7/L12 && PF00542:Ribosomal protein L7/L12 C-terminal domain
	novel.6386		RPL9	ath03010	Ribosome	0	8	0	1.51018	5.6278	0.0238324	- && P11894.2 RecName: Full=50S ribosomal protein L9, chloroplastic; AltName: Full=CL9; Flags: Precursor && -
	MS.gene029872		RPS23	ath03010	Ribosome	33.3333	62	9.9126	20.3653	1.03831	0.0288999	- && Q9M5Z9.1 RecName: Full=40S ribosomal protein S23 && PF00164:Ribosomal protein S12/S23
	novel.5185		RPL9	ath03010	Ribosome	0	5	0	0.797117	4.90287	0.0339077	- && P11894.2 RecName: Full=50S ribosomal protein L9, chloroplastic; AltName: Full=CL9; Flags: Precursor && -
	MS.gene50640		RPL21A	ath03010	Ribosome	964.333	1349	249.01	384.925	0.628337	0.0350398	- && Q43291.2 RecName: Full=60S ribosomal protein L21-1 && PF01157:Ribosomal protein L21e
	MS.gene27252		RPL31	ath03010	Ribosome	45	93.3333	24.9418	57.4072	1.2023	0.0413103	- && Q9FWS4.1 RecName: Full=50S ribosomal protein L31, chloroplastic; AltName: Full=CL31; AltName: Full=Protein EMBRYO DEFECTIVE 2184; Flags: Precursor && PF01197:Ribosomal protein L31
	MS.gene64330		RPLX	ath03010	Ribosome	113.333	174	30.2148	50.9647	0.754876	0.0417653	- && A9VP88.1 RecName: Full=50S ribosomal protein L24 && PF00467:KOW motif
	novel.3388		RPS13	ath03010	Ribosome	20.6667	41	3.39379	7.39996	1.12553	0.0438201	- && P42732.1 RecName: Full=30S ribosomal protein S13, chloroplastic; AltName: Full=CS13; Flags: Precursor && PF00416:Ribosomal protein S13/S18
	MS.gene71044		RPS9C	ath03010	Ribosome	17.3333	34.6667	3.52202	7.76123	1.14003	0.0481664	- && Q9FLF0.1 RecName: Full=40S ribosomal protein S9-2 && PF00163:Ribosomal protein S4/S9 N-terminal domain|PF01479:S4 domain
	MS.gene21530		RPL19	ath03010	Ribosome	6	23	1.10073	4.75401	2.10792	2.11082e-21	- && P82413.2 RecName: Full=50S ribosomal protein L19, chloroplastic; AltName: Full=CL19; Flags: Precursor && PF01245:Ribosomal protein L19
	MS.gene033416		RPS13	ath03010	Ribosome	0	4.33333	0	1.55174	4.72012	3.86493e-21	- && P62302.1 RecName: Full=40S ribosomal protein S13 && PF00312:Ribosomal protein S15|PF08069:Ribosomal S13/S15 N-terminal domain
	MS.gene39902		RPS15D	ath03010	Ribosome	951.333	172.333	264.553	52.8445	-2.32341	9.0042e-19	- && Q9FY64.1 RecName: Full=40S ribosomal protein S15-4 && PF00203:Ribosomal protein S19
	MS.gene019322		RPS10A	ath03010	Ribosome	817.667	0	192.381	0	-11.9752	2.5523e-16	- && Q9SW09.1 RecName: Full=40S ribosomal protein S10-1 && PF03501:Plectin/S10 domain
	MS.gene01768		RPL26B	ath03010	Ribosome	307.667	44.3333	89.2267	14.1822	-2.65355	8.32939e-15	- && Q9FJX2.1 RecName: Full=60S ribosomal protein L26-2 && PF00467:KOW motif|PF16906:Ribosomal proteins L26 eukaryotic, L24P archaeal
	MS.gene030818		RPL29	ath03010	Ribosome	167	10.3333	42.1139	2.8789	-3.87195	1.13736e-11	- && Q9FJP3.1 RecName: Full=50S ribosomal protein L29, chloroplastic; AltName: Full=CL29; Flags: Precursor && PF00831:Ribosomal L29 protein
	MS.gene047337		RPL15	ath03010	Ribosome	208.667	10.3333	43.316	2.33227	-4.20741	2.17757e-10	- && O82528.1 RecName: Full=60S ribosomal protein L15 && PF00827:Ribosomal L15
	MS.gene05100		RPL17	ath03010	Ribosome	171	18.3333	34.4193	4.08625	-3.07674	2.519e-09	- && O80363.1 RecName: Full=50S ribosomal protein L17, chloroplastic; AltName: Full=CL17; Flags: Precursor && PF01196:Ribosomal protein L17
	MS.gene54324		RPS27B	ath03010	Ribosome	77	0	61.7475	0	-8.56406	1.03347e-06	- && Q9M2F1.2 RecName: Full=40S ribosomal protein S27-2 && PF01667:Ribosomal protein S27
	MS.gene004883		RPS16-1	ath03010	Ribosome	108.333	10	38.3206	3.89914	-3.29443	1.83567e-06	- && O65686.1 RecName: Full=30S ribosomal protein S16-1, chloroplastic; AltName: Full=Small subunit ribosomal protein 16; Flags: Precursor && PF00886:Ribosomal protein S16
	MS.gene56718		RPMB	ath03010	Ribosome	90.6667	17.6667	16.5745	3.56297	-2.2177	2.38899e-06	- && A0L5U1.1 RecName: Full=50S ribosomal protein L28 && PF00830:Ribosomal L28 family
	MS.gene77207		RPL7A	ath03010	Ribosome	615	177.333	106.086	33.5398	-1.66062	4.17093e-06	- && Q9SAI5.1 RecName: Full=60S ribosomal protein L7-1 && PF08079:Ribosomal L30 N-terminal domain|PF00327:Ribosomal protein L30p/L7e
	MS.gene068734		RPL21M	ath03010	Ribosome	120.667	25	22.4444	5.17184	-2.12088	4.5038e-06	- && Q8L9A0.1 RecName: Full=50S ribosomal protein L21, mitochondrial; AltName: Full=Protein NUCLEAR FUSION DEFECTIVE 1; Flags: Precursor && -
	MS.gene24492		RPS11	ath03010	Ribosome	44.3333	2.66667	11.6288	0.760077	-3.91998	1.44985e-05	- && P17093.2 RecName: Full=40S ribosomal protein S11 && PF00366:Ribosomal protein S17|PF16205:Ribosomal_S17 N-terminal
	MS.gene69781		RPL24	ath03010	Ribosome	336	123.333	73.471	29.726	-1.30534	3.86117e-05	- && P11893.1 RecName: Full=50S ribosomal protein L24, chloroplastic; AltName: Full=CL24; Flags: Precursor && PF00467:KOW motif
	MS.gene045722		MNP1	ath03010	Ribosome	36.3333	0.666667	7.16041	0.141888	-5.63497	0.000229465	- && P53163.1 RecName: Full=54S ribosomal protein L12, mitochondrial; AltName: Full=Mitochondrial-nucleoid protein 1; Flags: Precursor && PF00542:Ribosomal protein L7/L12 C-terminal domain
	novel.3881		RPS13	ath03010	Ribosome	19.6667	0	2.06229	0	-6.59507	0.000350647	- && P46298.1 RecName: Full=40S ribosomal protein S13 && PF08069:Ribosomal S13/S15 N-terminal domain
	MS.gene24930		RPL37B	ath03010	Ribosome	717.333	340.333	317.987	166.884	-0.930344	0.000450111	- && Q43292.2 RecName: Full=60S ribosomal protein L37-2 && PF01907:Ribosomal protein L37e
	MS.gene28569		RPLY	ath03010	Ribosome	104	36.3333	17.6637	6.8205	-1.37372	0.000537876	- && B0K775.1 RecName: Full=50S ribosomal protein L25; AltName: Full=General stress protein CTC >B0K664.1 RecName: Full=50S ribosomal protein L25; AltName: Full=General stress protein CTC && PF14693:Ribosomal protein TL5, C-terminal domain
	MS.gene010085		RPS6	ath03010	Ribosome	18	0.333333	4.34313	0.0875466	-5.50448	0.00067098	- && P29345.2 RecName: Full=40S ribosomal protein S6 && -
	MS.gene88892		RPS18A	ath03010	Ribosome	383	127.333	106.358	38.9756	-1.44798	0.00094532	- && P34788.1 RecName: Full=40S ribosomal protein S18 && PF00416:Ribosomal protein S13/S18
	novel.3421		RPLD	ath03010	Ribosome	12.3333	0	2.66425	0	-5.9191	0.00168074	- && B6IRQ7.1 RecName: Full=50S ribosomal protein L4 && PF00573:Ribosomal protein L4/L1 family
	novel.2855		RPL39C	ath03010	Ribosome	76.6667	11.3333	19.2881	3.09681	-2.63376	0.00200533	- && Q5SMI4.1 RecName: Full=60S ribosomal protein L39-3 && PF00832:Ribosomal L39 protein
	MS.gene09136		RPL9	ath03010	Ribosome	172	46.6667	37.9163	11.5133	-1.7218	0.00440774	- && P11894.2 RecName: Full=50S ribosomal protein L9, chloroplastic; AltName: Full=CL9; Flags: Precursor && -
	MS.gene69734		RPL11	ath03010	Ribosome	16.6667	1	4.38642	0.295468	-3.91072	0.00523994	- && Q9MAP3.1 RecName: Full=50S ribosomal protein L11, chloroplastic; AltName: Full=CL11; Flags: Precursor && PF00298:Ribosomal protein L11, RNA binding domain|PF03946:Ribosomal protein L11, N-terminal domain
	MS.gene031439		RPS20A	ath03010	Ribosome	452.667	250.333	155.485	94.9523	-0.711614	0.00642309	- && P49200.2 RecName: Full=40S ribosomal protein S20-1 && PF00338:Ribosomal protein S10p/S20e
	MS.gene043025		RPLI	ath03010	Ribosome	7.66667	0	1.46772	0	-5.24167	0.0138703	- && A1AM21.1 RecName: Full=50S ribosomal protein L9 && PF01281:Ribosomal protein L9, N-terminal domain
	novel.2906		RPP2D	ath03010	Ribosome	7	0	1.24896	0	-5.109	0.0156306	- && Q9LXM8.1 RecName: Full=60S acidic ribosomal protein P2-4 && -
	novel.1928		RPS6B	ath03010	Ribosome	471	249.333	18.6079	10.8919	-0.772898	0.0187078	- && P51430.3 RecName: Full=40S ribosomal protein S6-2; AltName: Full=Protein EMBRYO DEFECTIVE 3010 && -
	novel.3820		RPS25B	ath03010	Ribosome	10.6667	0	1.08484	0	-5.69929	0.0486245	- && Q9SIK2.1 RecName: Full=40S ribosomal protein S25-2 && -
	MS.gene88918		ARP1	ath03010	Ribosome	675.667	350.333	73.7994	42.0154	-0.812376	0.00972762	- && P17094.5 RecName: Full=60S ribosomal protein L3-1; AltName: Full=Protein EMBRYO DEFECTIVE 2207 && PF00297:Ribosomal protein L3
	MS.gene33828		RPS6A	ath03010	Ribosome	29.6667	5.33333	5.0421	1.00252	-2.32946	7.93995e-08	- && O48549.2 RecName: Full=40S ribosomal protein S6-1 && PF01092:Ribosomal protein S6e
	novel.283		FBX6	ath03010	Ribosome	13.3333	0.333333	2.24071	0.0612812	-5.06221	3.67649e-06	- && Q9FZK1.1 RecName: Full=F-box only protein 6 && -
Circadian rhythm – plant (ath04712)	MS.gene72380		CKB4	ath04712	Circadian rhythm – plant/Ribosome biogenesis in eukaryotes	102.333	2.66667	15.8084	0.450981	-5.12019	2.50405e-13	- && O80507.1 RecName: Full=Putative casein kinase II subunit beta-4; Short=CK II beta-4 && PF01214:Casein kinase II regulatory subunit
	MS.gene011742		HD6	ath04712	Circadian rhythm – plant/Ribosome biogenesis in eukaryotes	146.667	13	18.6986	1.81279	-3.36069	3.09383e-13	- && Q9AR27.1 RecName: Full=Casein kinase II subunit alpha-2; Short=OsCKA2; AltName: Full=Protein HEADING DATE 6 >B6F107.1 RecName: Full=Casein kinase II subunit alpha-2; Short=OsCKA2; AltName: Full=Protein HEADING DATE 6 && PF00069:Protein kinase domain
	MS.gene004854		CRY2	ath04712	Circadian rhythm – plant	104.667	436.667	7.03813	32.6249	2.21231	4.30597e-10	- && Q96524.2 RecName: Full=Cryptochrome-2; Short=Atcry2; AltName: Full=Blue light photoreceptor; AltName: Full=Protein PHR homolog 1; Short=AtPHH1; AltName: Full=Protein SUPPRESSOR OF elf3 20 && PF03441:FAD binding domain of DNA photolyase|PF00875:DNA ph
	MS.gene043955		CRY1	ath04712	Circadian rhythm – plant	289	73.3333	18.0834	5.11673	-1.82306	1.73362e-05	- && Q43125.2 RecName: Full=Cryptochrome-1; Short=AtCry; Short=Atcry1; AltName: Full=Blue light photoreceptor; AltName: Full=Protein BLUE LIGHT UNINHIBITED 1; AltName: Full=Protein ELONGATED HYPOCOTYL 4; AltName: Full=Protein OUT OF PHASE 2; Short=OOP2 &&
	MS.gene046371		SPA1	ath04712	Circadian rhythm – plant	0.333333	22.3333	0.0151615	1.09294	6.10049	9.94513e-05	- && Q9SYX2.1 RecName: Full=Protein SUPPRESSOR OF PHYA-105 1 && PF00069:Protein kinase domain
	MS.gene08517		PRR95	ath04712	Circadian rhythm – plant	45.6667	121	3.17102	9.24939	1.54508	0.00283859	- && Q689G6.1 RecName: Full=Two-component response regulator-like PRR95; AltName: Full=Pseudo-response regulator 95; Short=OsPRR95 && PF00072:Response regulator receiver domain|PF06203:CCT motif
