# Supplementary material for: Differentially expressed genes related to plant height and yield in two alfalfa cultivars based on RNA-seq
Source: PeerJ. 2022 Oct 10;10:e14096. doi: 10.7717/peerj.14096 (PMC9558622; doi:10.7717/peerj.14096)
Supplement: Supplemental Information 10 [file peerj-10-14096-s010.xlsx]

## Sheet: Sheet1
Table S8 The GO enrichment of several DEGs associated with develoment
GO term	Gene ID	Name	AJ_Fpkm	WJ_Fpkm	WJvsAJ_padj	Annotation
Formation of water-conducting tissues	MS.gene033093	EIF5A	1.57911	172.091	4.94275e-48	- && P26564.1 RecName: Full=Eukaryotic translation initiation factor 5A-1; Short=eIF-5A-1; AltName: Full=eIF-4D && PF01287:Eukaryotic elongation factor 5A hypusine, DNA-binding OB fold
	MS.gene064280	EIF5A	527.063	1185.73	2.52204e-06	- && P26564.1 RecName: Full=Eukaryotic translation initiation factor 5A-1; Short=eIF-5A-1; AltName: Full=eIF-4D && PF01287:Eukaryotic elongation factor 5A hypusine, DNA-binding OB fold
	MS.gene66596	ANP3	0.684226	4.23796	0.000836379	- && O22042.1 RecName: Full=Mitogen-activated protein kinase kinase kinase 3; AltName: Full=Arabidopsis NPK1-related protein kinase 3 && PF00069:Protein kinase domain
	MS.gene95324	TPS6	0.965565	4.78268	6.6796e-06	- && Q94AH8.2 RecName: Full=Alpha,alpha-trehalose-phosphate synthase [UDP-forming] 6; AltName: Full=Trehalose-6-phosphate synthase 6; Short=AtTPS6 && PF02358:Trehalose-phosphatase|PF00982:Glycosyltransferase family 20
Biosynthesis and degradation of lignin	MS.gene98039	CYP73A3	145.478	437.551	2.77718e-05	- && P37114.1 RecName: Full=Trans-cinnamate 4-monooxygenase; AltName: Full=Cinnamic acid 4-hydroxylase; Short=C4H; Short=CA4H; AltName: Full=Cytochrome P450 73; AltName: Full=Cytochrome P450C4H && PF00067:Cytochrome P450
	MS.gene71681	CAD2	102.069	231.323	0.00038761	- && P31656.1 RecName: Full=Probable cinnamyl alcohol dehydrogenase; Short=CAD && PF00107:Zinc-binding dehydrogenase|PF08240:Alcohol dehydrogenase GroES-like domain
	MS.gene070268	PER16	0.217664	8.56999	3.61155e-07	- && Q96518.2 RecName: Full=Peroxidase 16; Short=Atperox P16; AltName: Full=ATP22a; Flags: Precursor && -
	MS.gene67694	PER64	0	2.46275	2.3328e-05	- && Q43872.1 RecName: Full=Peroxidase 64; Short=Atperox P64; AltName: Full=ATP17a; AltName: Full=PRXR4; Flags: Precursor && PF00141:Peroxidase
	MS.gene57204	PER51	9.97938	157.977	3.10521e-24	- && Q9SZE7.1 RecName: Full=Peroxidase 51; Short=Atperox P51; AltName: Full=ATP37; Flags: Precursor && PF00141:Peroxidase
	novel.897	PER47	54.4152	52.9716	0.949677	- && Q9SZB9.2 RecName: Full=Peroxidase 47; Short=Atperox P47; AltName: Full=ATP32; Flags: Precursor && PF00141:Peroxidase
	MS.gene33530	BGLU46	34.0391	1.42992	5.87067e-48	- && O80690.2 RecName: Full=Beta-glucosidase 46; Short=AtBGLU46; Flags: Precursor && PF00232:Glycosyl hydrolase family 1
	MS.gene003286	POD 15	92.0797	21.3294	1.56869e-08	- && Q9LEH3.1 RecName: Full=Peroxidase 15; Short=Prx15; AltName: Full=Anionic peroxidase; Flags: Precursor && PF00141:Peroxidase
	MS.gene073776	POD 21	7.54392	0	8.78768e-09	- && Q42580.1 RecName: Full=Peroxidase 21; Short=Atperox P21; AltName: Full=ATP2a/ATP2b; AltName: Full=PRXR5; Flags: Precursor && PF00141:Peroxidase
	MS.gene44482	POD 73	40.1267	12.6581	4.57852e-06	- && Q43873.1 RecName: Full=Peroxidase 73; Short=Atperox P73; AltName: Full=ATP10a; AltName: Full=PRXR11; Flags: Precursor && PF00141:Peroxidase
	MS.gene009691	POD 4	7.14192	2.64935	0.0189261	- && A7NY33.1 RecName: Full=Peroxidase 4; Flags: Precursor && PF00141:Peroxidase
	MS.gene060053	POD 55	5.71861	0.146517	1.03869e-06	- && Q96509.1 RecName: Full=Peroxidase 55; Short=Atperox P55; AltName: Full=ATP20a; Flags: Precursor && PF00141:Peroxidase
	MS.gene24236	POD 9	0.92893	0	0.0192364	- && Q96512.1 RecName: Full=Peroxidase 9; Short=Atperox P9; AltName: Full=ATP18a; Flags: Precursor && -
	MS.gene02084	POD 15	27.0232	0	3.06439e-14	- && Q9LEH3.1 RecName: Full=Peroxidase 15; Short=Prx15; AltName: Full=Anionic peroxidase; Flags: Precursor && PF00141:Peroxidase
Formation of the primary cell wall or secondary cell wall	MS.gene007455	IRX9	16.8807	184.198	8.27679e-23	- && Q9ZQC6.1 RecName: Full=Probable beta-1,4-xylosyltransferase IRX9; AltName: Full=Protein IRREGULAR XYLEM 9; AltName: Full=Xylan xylosyltransferase IRX9 && PF03360:Glycosyltransferase family 43
	MS.gene20238	IRX14H	49.1361	382.723	2.60029e-22	- && Q9FH90.1 RecName: Full=Probable beta-1,4-xylosyltransferase IRX14H; AltName: Full=Protein IRREGULAR XYLEM 14 homolog; AltName: Full=Xylan xylosyltransferase IRX14H && PF03360:Glycosyltransferase family 43
	MS.gene002608	CESA8	17.7321	148.2	3.36432e-15	- && Q8LPK5.1 RecName: Full=Cellulose synthase A catalytic subunit 8 [UDP-forming]; Short=AtCesA8; AltName: Full=Protein IRREGULAR XYLEM 1; Short=AtIRX1; AltName: Full=Protein LEAF WILTING 2 && PF03552:Cellulose synthase|PF14569:Zinc-binding RING-finger
	MS.gene30425	CCoAMT	0	3.63897	8.81304e-05	- && Q9C5D7.1 RecName: Full=Probable caffeoyl-CoA O-methyltransferase At4g26220; AltName: Full=Trans-caffeoyl-CoA 3-O-methyltransferase; Short=CCoAMT; Short=CCoAOMT && PF01596:O-methyltransferase
	MS.gene86751	CESA3	51.4047	161.191	5.33989e-13	- && Q941L0.2 RecName: Full=Cellulose synthase A catalytic subunit 3 [UDP-forming]; Short=AtCesA3; AltName: Full=Constitutive expression of VSP1 protein 1; AltName: Full=Isoxaben-resistant protein 1; Short=Ath-B; AltName: Full=Protein ECTOPIC LIGNIN 1; Al
	MS.gene58679	CESA4	29.1556	119.027	1.10047e-11	- && Q84JA6.1 RecName: Full=Cellulose synthase A catalytic subunit 4 [UDP-forming]; Short=AtCesA4; AltName: Full=Protein IRREGULAR XYLEM 5; Short=AtIRX5 && PF03552:Cellulose synthase|PF14569:Zinc-binding RING-finger
	MS.gene035614	CESA7	94.7788	415.768	1.21519e-09	- && Q9SWW6.1 RecName: Full=Cellulose synthase A catalytic subunit 7 [UDP-forming]; Short=AtCesA7; AltName: Full=Protein FRAGILE FIBER 5; AltName: Full=Protein IRREGULAR XYLEM 3; Short=AtIRX3 && PF14569:Zinc-binding RING-finger|PF03552:Cellulose synthase
	MS.gene073454	CESA4	57.247	211.913	6.7782e-06	- && Q84JA6.1 RecName: Full=Cellulose synthase A catalytic subunit 4 [UDP-forming]; Short=AtCesA4; AltName: Full=Protein IRREGULAR XYLEM 5; Short=AtIRX5 && PF03552:Cellulose synthase|PF14569:Zinc-binding RING-finger
	MS.gene57477	CESA4	170.098	391.811	5.19933e-05	- && Q84JA6.1 RecName: Full=Cellulose synthase A catalytic subunit 4 [UDP-forming]; Short=AtCesA4; AltName: Full=Protein IRREGULAR XYLEM 5; Short=AtIRX5 && PF03552:Cellulose synthase|PF14569:Zinc-binding RING-finger
	MS.gene46719	CESA3	190.133	67.3039	2.90042e-13	- && Q941L0.2 RecName: Full=Cellulose synthase A catalytic subunit 3 [UDP-forming]; Short=AtCesA3; AltName: Full=Constitutive expression of VSP1 protein 1; AltName: Full=Isoxaben-resistant protein 1; Short=Ath-B; AltName: Full=Protein ECTOPIC LIGNIN 1; Al
	MS.gene014820	CESA1	67.3813	23.319	1.55577e-12	- && O48946.1 RecName: Full=Cellulose synthase A catalytic subunit 1 [UDP-forming]; Short=AtCesA1; AltName: Full=Protein RADIALLY SWOLLEN 1; Short=AtRSW1 && PF03552:Cellulose synthase
Cell enlargement and plant growth	MS.gene003525	LAX5	4.90266	35.4899	7.7921e-17	- && Q8L883.1 RecName: Full=Auxin transporter-like protein 5; AltName: Full=AUX1-like protein 5; AltName: Full=MtLAX5 && PF01490:Transmembrane amino acid transporter protein
	MS.gene008982	IAA9	13.212	79.0628	5.88209e-19	- && Q38827.1 RecName: Full=Auxin-responsive protein IAA9; AltName: Full=Indoleacetic acid-induced protein 9 && PF02309:AUX/IAA family
	MS.gene79533	IAA6	0.623205	10.8983	1.62035e-07	- && P49680.1 RecName: Full=Auxin-induced protein IAA6 && PF02309:AUX/IAA family
	MS.gene07404	AUX22B	7.88332	66.9488	3.23571e-08	- && P32294.1 RecName: Full=Auxin-induced protein 22B; AltName: Full=Indole-3-acetic acid-induced protein ARG4 && PF02309:AUX/IAA family
	MS.gene003632	SAUR50	2.51178	26.0419	4.02805e-08	- && O65695.1 RecName: Full=Auxin-responsive protein SAUR50; AltName: Full=Protein SMALL AUXIN UP RNA 50 && PF02519:Auxin responsive protein
	MS.gene067310	SAUR32	0.664261	20.9182	4.58934e-07	- && Q9ZUZ3.1 RecName: Full=Auxin-responsive protein SAUR32; AltName: Full=Protein ABOLISHED APICAL HOOK MAINTENANCE 1; AltName: Full=Protein SMALL AUXIN UP RNA 32 && PF02519:Auxin responsive protein
	MS.gene20109	SAUR36	0	30.2909	6.68535e-12	- && O22150.1 RecName: Full=Auxin-responsive protein SAUR36; AltName: Full=Protein RESPONSE TO AUXINS AND GIBBERELLINS 1; AltName: Full=Protein SENESCENCE-ASSOCIATED GENE 201; AltName: Full=Protein SMALL AUXIN UP RNA 36 && PF02519:Auxin responsive protein
	MS.gene057776	SAUR24	0.151299	2.62746	0.0443119	- && Q9FK62.1 RecName: Full=Auxin-responsive protein SAUR24; AltName: Full=Protein SMALL AUXIN UP RNA 24 && PF02519:Auxin responsive protein
	MS.gene052742	LAX4	2.75376	0.236803	0.00207462	- && Q8L884.1 RecName: Full=Auxin transporter-like protein 4; AltName: Full=AUX1-like protein 4; AltName: Full=MtLAX4 && PF01490:Transmembrane amino acid transporter protein
	MS.gene32212	TIR1	22.6597	12.0455	0.0255648	- && Q570C0.2 RecName: Full=Protein TRANSPORT INHIBITOR RESPONSE 1; AltName: Full=Weak ethylene-insensitive protein 1 && -
	MS.gene89092	IAA17	5.79564	0.506373	0.0140099	- && P93830.2 RecName: Full=Auxin-responsive protein IAA17; AltName: Full=Auxin response 3; AltName: Full=Indoleacetic acid-induced protein 17 && PF02309:AUX/IAA family
	MS.gene24179	ARF5	1.29703	0.0178336	4.08679e-05	- && P93024.3 RecName: Full=Auxin response factor 5; AltName: Full=Auxin-responsive protein IAA24; AltName: Full=Transcription factor MONOPTEROS && PF02362:B3 DNA binding domain|PF02309:AUX/IAA family|PF06507:Auxin response factor
	MS.gene95748	GH3.5	7.27457	0.349396	7.45814e-14	- && Q6I581.1 RecName: Full=Jasmonic acid-amido synthetase JAR1; AltName: Full=Auxin-responsive GH3-like protein 5; Short=OsGH3-5; AltName: Full=Indole-3-acetic acid-amido synthetase GH3.5; AltName: Full=Jasmonate-amino acid synthetase JAR1; AltName: Full
	MS.gene45855	SAUR36	18.3464	5.18828	0.000344458	- && O22150.1 RecName: Full=Auxin-responsive protein SAUR36; AltName: Full=Protein RESPONSE TO AUXINS AND GIBBERELLINS 1; AltName: Full=Protein SENESCENCE-ASSOCIATED GENE 201; AltName: Full=Protein SMALL AUXIN UP RNA 36 && PF02519:Auxin responsive protein
	MS.gene022510	ACC1	10.1117	4.32964	0.00103665	- && Q38970.1 RecName: Full=Acetyl-CoA carboxylase 1; Short=AtACC1; AltName: Full=Protein EMBRYO DEFECTIVE 22; AltName: Full=Protein GURKE; AltName: Full=Protein PASTICCINO 3; Includes: RecName: Full=Biotin carboxylase && PF00364:Biotin-requiring enzyme|P
	MS.gene004143	MPK3	92.8986	5.0579	1.66394e-12	- && Q39023.2 RecName: Full=Mitogen-activated protein kinase 3; Short=AtMPK3; Short=MAP kinase 3 && PF00069:Protein kinase domain
	novel.3769	N/A	0	1.97331	3.96903e-06	- && P33080.1 RecName: Full=Auxin-induced protein X10A && PF02519:Auxin responsive protein
	novel.2422	N/A	0	4.42672	4.57662e-05	- && P33080.1 RecName: Full=Auxin-induced protein X10A && PF02519:Auxin responsive protein
Cell division and shoot initiation	MS.gene031171	UGT85A24	0.0252838	0.51276	0.0361985	- && F8WKW1.1 RecName: Full=7-deoxyloganetin glucosyltransferase; AltName: Full=Genipin glucosyltransferase; AltName: Full=UDP-glucose glucosyltransferase 2; Short=GjUGT2; AltName: Full=UDP-glycosyltransferase 85A24 && PF00201:UDP-glucoronosyl and UDP-glu
	MS.gene95324	TPS6	0.965565	4.78268	6.6796e-06	- && Q94AH8.2 RecName: Full=Alpha,alpha-trehalose-phosphate synthase [UDP-forming] 6; AltName: Full=Trehalose-6-phosphate synthase 6; Short=AtTPS6 && PF02358:Trehalose-phosphatase|PF00982:Glycosyltransferase family 20
	MS.gene00889	IPT5	4.89678	2.25705	0.0181555	- && Q94ID2.2 RecName: Full=Adenylate isopentenyltransferase 5, chloroplastic; Short=AtIPT5; AltName: Full=Adenylate dimethylallyltransferase 5; AltName: Full=Cytokinin synthase 5; Flags: Precursor && PF01715:IPP transferase
	MS.gene34593	CKX6	1.38946	0.124451	0.0234523	- && Q9LY71.2 RecName: Full=Cytokinin dehydrogenase 6; AltName: Full=Cytokinin oxidase 6; Short=AtCKX6; Short=AtCKX7; Short=CKO6; Flags: Precursor && PF01565:FAD binding domain|PF09265:Cytokinin dehydrogenase 1, FAD and cytokinin binding
	MS.gene80979	CYP735A2	1.43258	0.199841	0.00679874	- && Q9ZW95.1 RecName: Full=Cytokinin hydroxylase; AltName: Full=Cytochrome P450 35A2 && PF00067:Cytochrome P450
Stem growth and induced germination	MS.gene008246	GAI	9.85985	63.2422	3.23462e-22	- && Q7Y1B6.1 RecName: Full=DELLA protein GAI; AltName: Full=Gibberellic acid-insensitive mutant protein && PF12041:Transcriptional regulator DELLA protein N terminal|PF03514:GRAS domain family
	MS.gene015125	GID2	45.6502	21.8984	0.00545117	- && Q9STX3.1 RecName: Full=F-box protein GID2; AltName: Full=Protein SLEEPY 1 && -
Cell elongation	MS.gene011637	BSK1	11.6628	1.21682	9.18078e-14	- && Q944A7.1 RecName: Full=Probable serine/threonine-protein kinase At4g35230 && PF07714:Protein tyrosine kinase
	MS.gene023870	BSK8	20.9609	8.65305	0.000152046	- && Q9FHD7.1 RecName: Full=Probable serine/threonine-protein kinase At5g41260 && -
Innate immunity and disease resistance	MS.gene071870	PR-1	15.6253	0	3.88108e-12	- && P33154.1 RecName: Full=Pathogenesis-related protein 1; Short=PR-1; Flags: Precursor && PF01490:Transmembrane amino acid transporter protein|PF11744:Aluminium activated malate transporter|PF00188:Cysteine-rich secretory protein family
	MS.gene064838	CAT4	97.2128	61.1965	0.0349502	- && O48561.1 RecName: Full=Catalase-4 && PF06628:Catalase-related immune-responsive|PF00199:Catalase
	MS.gene043230	CHI2	5.96496	32.4746	0.000842058	- && P21226.2 RecName: Full=Endochitinase A2; Flags: Precursor && PF00182:Chitinase class I|PF00187:Chitin recognition protein
	MS.gene011287	RBOHC	25.2633	8.25939	7.57412e-06	- && Q2HXL0.2 RecName: Full=Respiratory burst oxidase homolog protein C; AltName: Full=NADPH oxidase RBOHC; AltName: Full=StRBOHC && PF08414:Respiratory burst NADPH oxidase
	MS.gene044449	RBOHF	19.3129	9.08363	0.00379544	- && O48538.1 RecName: Full=Respiratory burst oxidase homolog protein F; AltName: Full=Cytochrome b245 beta chain homolog RbohAp108; AltName: Full=NADPH oxidase RBOHF; Short=AtRBOHF && PF08414:Respiratory burst NADPH oxidase|PF00076:RNA recognition motif.
	MS.gene98039	CYP73A3	145.478	437.551	2.77718e-05	- && P37114.1 RecName: Full=Trans-cinnamate 4-monooxygenase; AltName: Full=Cinnamic acid 4-hydroxylase; Short=C4H; Short=CA4H; AltName: Full=Cytochrome P450 73; AltName: Full=Cytochrome P450C4H && PF00067:Cytochrome P450
	MS.gene043341	petC	129.845	23.5068	7.83166e-11	- && P26291.1 RecName: Full=Cytochrome b6-f complex iron-sulfur subunit, chloroplastic; AltName: Full=Plastohydroquinone:plastocyanin oxidoreductase iron-sulfur protein; AltName: Full=Rieske iron-sulfur protein; Short=ISP; Short=RISP; Flags: Precursor &&
	novel.3275	RBOHF	5.69274	0.0571098	1.89942e-05	- && O48538.1 RecName: Full=Respiratory burst oxidase homolog protein F; AltName: Full=Cytochrome b245 beta chain homolog RbohAp108; AltName: Full=NADPH oxidase RBOHF; Short=AtRBOHF && PF08030:Ferric reductase NAD binding domain
	novel.142	AAE7	36.5178	23.1346	0.00445656	- && Q8VZF1.1 RecName: Full=Acetate/butyrate--CoA ligase AAE7, peroxisomal; AltName: Full=AMP-binding protein 7; Short=AtAMPBP7; AltName: Full=Acetyl-CoA synthetase; AltName: Full=Acyl-activating enzyme 7; AltName: Full=Butyryl-CoA synthetase; AltName: Fu
	MS.gene75432	PSBS	7.47142	81.2899	4.06562e-08	- && Q02060.1 RecName: Full=Photosystem II 22 kDa protein, chloroplastic; AltName: Full=CP22; Flags: Precursor && PF00504:Chlorophyll A-B binding protein
Fruit ripening and senescence	MS.gene067614	ETR1	7.25698	18.9772	1.14726e-07	- && O81122.1 RecName: Full=Ethylene receptor && PF01590:GAF domain|PF00072:Response regulator receiver domain|PF02518:Histidine kinase-, DNA gyrase B-, and HSP90-like ATPase|PF00512:His Kinase A (phospho-acceptor) domain
	MS.gene98149	MKK4	7.90578	25.4277	3.37538e-06	- && O80397.1 RecName: Full=Mitogen-activated protein kinase kinase 4; Short=AtMKK4; Short=MAP kinase kinase 4 && PF00069:Protein kinase domain
	MS.gene47530	MMK1	0.292434	22.8266	2.80219e-22	- && Q07176.1 RecName: Full=Mitogen-activated protein kinase homolog MMK1; AltName: Full=MAP kinase ERK1; AltName: Full=MAP kinase MSK7 && PF00069:Protein kinase domain
	MS.gene25897	EIN3	2.55094	6.79975	0.0129995	- && O24606.1 RecName: Full=Protein ETHYLENE INSENSITIVE 3 && PF04873:Ethylene insensitive 3
Senescence and stress response	novel.8847	COI1A	1.27413	11.8891	2.44768e-07	- && Q6Y9P5.1 RecName: Full=Coronatine-insensitive protein homolog 1a; Short=OsCOI1a >A2WX30.1 RecName: Full=Coronatine-insensitive protein homolog 1a && -
	MS.gene74585	TIFY6B	0	0.679575	0.0225048	- && Q9LVI4.1 RecName: Full=Protein TIFY 6B; AltName: Full=Jasmonate ZIM domain-containing protein 3; AltName: Full=Protein JASMONATE INSENSITIVE 3 && PF09425:Divergent CCT motif|PF06200:tify domain
	MS.gene074449	TIFY11B	27.7422	2.24776	1.65408e-07	- && Q9C9E3.1 RecName: Full=Protein TIFY 11B; AltName: Full=Jasmonate ZIM domain-containing protein 6 && PF06200:tify domain|PF09425:Divergent CCT motif
	MS.gene057422	TIFY10B	145.241	38.7502	0.00217218	- && Q9S7M2.1 RecName: Full=Protein TIFY 10B; AltName: Full=Jasmonate ZIM domain-containing protein 2 && PF06200:tify domain|PF09425:Divergent CCT motif
	MS.gene025386	TIFY3B	24.2033	4.62213	2.44517e-08	- && Q9C5K8.1 RecName: Full=Protein TIFY 3B; AltName: Full=Jasmonate ZIM domain-containing protein 12 && PF06200:tify domain|PF09425:Divergent CCT motif
	novel.4711	TIFY10A	8.0232	0.881898	0.0203269	- && Q84R94.1 RecName: Full=Protein TIFY 10a; Short=OsTIFY10a; AltName: Full=Jasmonate ZIM domain-containing protein 6; Short=OsJAZ6; AltName: Full=OsJAZ5 && -
Stomatal closure and seed dormancy	MS.gene94210	PYL4	0.135919	2.59	0.00708457	- && O80920.1 RecName: Full=Abscisic acid receptor PYL4; AltName: Full=ABI1-binding protein 2; AltName: Full=PYR1-like protein 4; AltName: Full=Regulatory components of ABA receptor 10 && PF10604:Polyketide cyclase / dehydrase and lipid transport
	MS.gene013622	PYL8	11.656	0.154082	5.19858e-07	- && Q9FGM1.1 RecName: Full=Abscisic acid receptor PYL8; AltName: Full=ABI1-binding protein 1; AltName: Full=PYR1-like protein 8; AltName: Full=Regulatory components of ABA receptor 3 && PF10604:Polyketide cyclase / dehydrase and lipid transport
	MS.gene70142	SRK2A	0.975025	7.63376	0.00241714	- && P43291.1 RecName: Full=Serine/threonine-protein kinase SRK2A; AltName: Full=Arabidopsis protein SK1; AltName: Full=OST1-kinase-like 7; AltName: Full=SNF1-related kinase 2.4; Short=SnRK2.4 && PF00069:Protein kinase domain
	MS.gene047674	SRK2I	24.0457	8.7345	0.00192615	- && Q39193.1 RecName: Full=Serine/threonine-protein kinase SRK2I; AltName: Full=OST1-kinase-like 2; AltName: Full=Protein ATHPROKIN B; AltName: Full=SNF1-related kinase 2.3; Short=SnRK2.3 && PF00069:Protein kinase domain
	MS.gene84330	DPBF2	0	0.76317	0.0223068	- && Q8RYD6.1 RecName: Full=ABSCISIC ACID-INSENSITIVE 5-like protein 1; AltName: Full=Dc3 promoter-binding factor 2; Short=AtDPBF2; AltName: Full=bZIP transcription factor 67; Short=AtbZIP67 && -
	MS.gene047841	ABF4	16.1155	7.02817	0.00413229	- && Q9M7Q2.1 RecName: Full=ABSCISIC ACID-INSENSITIVE 5-like protein 7; AltName: Full=ABA-responsive element-binding protein 2; AltName: Full=Abscisic acid responsive elements-binding factor 4; Short=ABRE-binding factor 4; AltName: Full=bZIP transcription
	novel.4184	N/A	0.718555	3.14192	0.0215592	- && - && -
