# Supplementary material for: Differentially expressed genes related to plant height and yield in two alfalfa cultivars based on RNA-seq
Source: PeerJ. 2022 Oct 10;10:e14096. doi: 10.7717/peerj.14096 (PMC9558622; doi:10.7717/peerj.14096)
Supplement: Supplemental Information 11 [file peerj-10-14096-s011.xlsx]

## Sheet: Sheet1
Table S9 Several DEGs associated with growth and develoment
Gene_id	Gene_name	AJ_count	WJ_count	AJ_fpkm	WJ_fpkm	WJvsAJ_log2FC	WJvsAJ_padj	Gene_description
MS.gene007455	IRX9	94	923.667	16.8807	184.198	3.44755	8.27679e-23	- && Q9ZQC6.1 RecName: Full=Probable beta-1,4-xylosyltransferase IRX9; AltName: Full=Protein IRREGULAR XYLEM 9; AltName: Full=Xylan xylosyltransferase IRX9 && PF03360:Glycosyltransferase family 43
MS.gene20238	IRX14H	584.333	4104	49.1361	382.723	2.96131	2.60029e-22	- && Q9FH90.1 RecName: Full=Probable beta-1,4-xylosyltransferase IRX14H; AltName: Full=Protein IRREGULAR XYLEM 14 homolog; AltName: Full=Xylan xylosyltransferase IRX14H && PF03360:Glycosyltransferase family 43
MS.gene002608	CESA8	408.333	3092.67	17.7321	148.2	3.06301	3.36432e-15	- && Q8LPK5.1 RecName: Full=Cellulose synthase A catalytic subunit 8 [UDP-forming]; Short=AtCesA8; AltName: Full=Protein IRREGULAR XYLEM 1; Short=AtIRX1; AltName: Full=Protein LEAF WILTING 2 && PF03552:Cellulose synthase|PF14569:Zinc-binding RING-finger
MS.gene86751	CESA3	1302.33	3708.67	51.4047	161.191	1.64882	5.33989e-13	- && Q941L0.2 RecName: Full=Cellulose synthase A catalytic subunit 3 [UDP-forming]; Short=AtCesA3; AltName: Full=Constitutive expression of VSP1 protein 1; AltName: Full=Isoxaben-resistant protein 1; Short=Ath-B; AltName: Full=Protein ECTOPIC LIGNIN 1; Al
MS.gene58679	CESA4	716.333	2641.67	29.1556	119.027	2.02937	1.10047e-11	- && Q84JA6.1 RecName: Full=Cellulose synthase A catalytic subunit 4 [UDP-forming]; Short=AtCesA4; AltName: Full=Protein IRREGULAR XYLEM 5; Short=AtIRX5 && PF03552:Cellulose synthase|PF14569:Zinc-binding RING-finger
MS.gene035614	CESA7	2318	9209.33	94.7788	415.768	2.13313	1.21519e-09	- && Q9SWW6.1 RecName: Full=Cellulose synthase A catalytic subunit 7 [UDP-forming]; Short=AtCesA7; AltName: Full=Protein FRAGILE FIBER 5; AltName: Full=Protein IRREGULAR XYLEM 3; Short=AtIRX3 && PF14569:Zinc-binding RING-finger|PF03552:Cellulose synthase
MS.gene073454	CESA4	1406.67	4738.33	57.247	211.913	1.8882	6.7782e-06	- && Q84JA6.1 RecName: Full=Cellulose synthase A catalytic subunit 4 [UDP-forming]; Short=AtCesA4; AltName: Full=Protein IRREGULAR XYLEM 5; Short=AtIRX5 && PF03552:Cellulose synthase|PF14569:Zinc-binding RING-finger
MS.gene57477	CESA4	4178	8717	170.098	391.811	1.20379	5.19933e-05	- && Q84JA6.1 RecName: Full=Cellulose synthase A catalytic subunit 4 [UDP-forming]; Short=AtCesA4; AltName: Full=Protein IRREGULAR XYLEM 5; Short=AtIRX5 && PF03552:Cellulose synthase|PF14569:Zinc-binding RING-finger
MS.gene46719	CESA3	4762	1530.33	190.133	67.3039	-1.49819	2.90042e-13	- && Q941L0.2 RecName: Full=Cellulose synthase A catalytic subunit 3 [UDP-forming]; Short=AtCesA3; AltName: Full=Constitutive expression of VSP1 protein 1; AltName: Full=Isoxaben-resistant protein 1; Short=Ath-B; AltName: Full=Protein ECTOPIC LIGNIN 1; Al
MS.gene014820	CESA1	1476.33	463.333	67.3813	23.319	-1.53076	1.55577e-12	- && O48946.1 RecName: Full=Cellulose synthase A catalytic subunit 1 [UDP-forming]; Short=AtCesA1; AltName: Full=Protein RADIALLY SWOLLEN 1; Short=AtRSW1 && PF03552:Cellulose synthase
MS.gene20109	SAUR36	0	97.3333	0	30.2909	9.18907	6.68535e-12	- && O22150.1 RecName: Full=Auxin-responsive protein SAUR36; AltName: Full=Protein RESPONSE TO AUXINS AND GIBBERELLINS 1; AltName: Full=Protein SENESCENCE-ASSOCIATED GENE 201; AltName: Full=Protein SMALL AUXIN UP RNA 36 && PF02519:Auxin responsive protein
MS.gene057776	SAUR24	0.333333	5.33333	0.151299	2.62746	4.04527	0.0443119	- && Q9FK62.1 RecName: Full=Auxin-responsive protein SAUR24; AltName: Full=Protein SMALL AUXIN UP RNA 24 && PF02519:Auxin responsive protein
MS.gene45855	SAUR36	71.3333	18.3333	18.3464	5.18828	-1.82157	0.000344458	- && O22150.1 RecName: Full=Auxin-responsive protein SAUR36; AltName: Full=Protein RESPONSE TO AUXINS AND GIBBERELLINS 1; AltName: Full=Protein SENESCENCE-ASSOCIATED GENE 201; AltName: Full=Protein SMALL AUXIN UP RNA 36 && PF02519:Auxin responsive protein
MS.gene98149	MPK4	68.3333	199	7.90578	25.4277	1.68567	3.37538e-06	- && O80397.1 RecName: Full=Mitogen-activated protein kinase kinase 4; Short=AtMKK4; Short=MAP kinase kinase 4 && PF00069:Protein kinase domain
MS.gene004143	MPK3	813	40.3333	92.8986	5.0579	-4.1979	1.66394e-12	- && Q39023.2 RecName: Full=Mitogen-activated protein kinase 3; Short=AtMPK3; Short=MAP kinase 3 && PF00069:Protein kinase domain
MS.gene071870	PR-1	113.667	0	15.6253	0	-9.12946	3.88108e-12	- && P33154.1 RecName: Full=Pathogenesis-related protein 1; Short=PR-1; Flags: Precursor && PF01490:Transmembrane amino acid transporter protein|PF11744:Aluminium activated malate transporter|PF00188:Cysteine-rich secretory protein family
MS.gene064838	CAT4	1079	615.333	97.2128	61.1965	-0.667723	0.0349502	- && O48561.1 RecName: Full=Catalase-4 && PF06628:Catalase-related immune-responsive|PF00199:Catalase
MS.gene045741	GAPCP1	156	0	9.03666	0	-9.58316	2.40092e-13	- && Q9SAJ6.1 RecName: Full=Glyceraldehyde-3-phosphate dehydrogenase GAPCP1, chloroplastic; AltName: Full=Glyceraldehyde-3-phosphate dehydrogenase of plastid 1; AltName: Full=NAD-dependent glyceraldehydephosphate dehydrogenase chloroplastic 1; Flags: Prec
MS.gene034948	Os11g0148500	301	116.333	24.2175	10.2544	-1.23908	0.00529815	- && Q2RAK2.1 RecName: Full=Pyruvate kinase 1, cytosolic; Short=OsPK1 >B8BJ39.1 RecName: Full=Pyruvate kinase 1, cytosolic; Short=OsPK1 && -
MS.gene022510	ACC1	534.667	209	10.1117	4.32964	-1.22318	0.00103665	- && Q38970.1 RecName: Full=Acetyl-CoA carboxylase 1; Short=AtACC1; AltName: Full=Protein EMBRYO DEFECTIVE 22; AltName: Full=Protein GURKE; AltName: Full=Protein PASTICCINO 3; Includes: RecName: Full=Biotin carboxylase && PF00364:Biotin-requiring enzyme|P
MS.gene005433	SCL14	35	2.33333	5.59851	0.401757	-3.7894	0.00217768	- && Q9XE58.2 RecName: Full=Scarecrow-like protein 14; Short=AtSCL14; AltName: Full=GRAS family protein 2; Short=AtGRAS-2 && PF01373:Glycosyl hydrolase family 14|PF03514:GRAS domain family
MS.gene98039	CYP73A3	1737.33	4722	145.478	437.551	1.58862	2.77718e-05	- && P37114.1 RecName: Full=Trans-cinnamate 4-monooxygenase; AltName: Full=Cinnamic acid 4-hydroxylase; Short=C4H; Short=CA4H; AltName: Full=Cytochrome P450 73; AltName: Full=Cytochrome P450C4H && PF00067:Cytochrome P450
MS.gene30425	CAMT3	0	14.6667	0	3.63897	6.44914	8.81304e-05	- && Q9C5D7.1 RecName: Full=Probable caffeoyl-CoA O-methyltransferase At4g26220; AltName: Full=Trans-caffeoyl-CoA 3-O-methyltransferase; Short=CCoAMT; Short=CCoAOMT && PF01596:O-methyltransferase
MS.gene71681	CAD2	859.667	1775	102.069	231.323	1.18044	0.00038761	- && P31656.1 RecName: Full=Probable cinnamyl alcohol dehydrogenase; Short=CAD && PF00107:Zinc-binding dehydrogenase|PF08240:Alcohol dehydrogenase GroES-like domain
MS.gene070268	PER16	1.66667	59	0.217664	8.56999	5.29303	3.61155e-07	- && Q96518.2 RecName: Full=Peroxidase 16; Short=Atperox P16; AltName: Full=ATP22a; Flags: Precursor && -
MS.gene67694	PER64	0	16.6667	0	2.46275	6.63903	2.3328e-05	- && Q43872.1 RecName: Full=Peroxidase 64; Short=Atperox P64; AltName: Full=ATP17a; AltName: Full=PRXR4; Flags: Precursor && PF00141:Peroxidase
MS.gene57204	PER51	77.3333	1098.67	9.97938	157.977	3.98395	3.10521e-24	- && Q9SZE7.1 RecName: Full=Peroxidase 51; Short=Atperox P51; AltName: Full=ATP37; Flags: Precursor && PF00141:Peroxidase
MS.gene33530	BGLU46	769	29.3333	34.0391	1.42992	-4.573	5.87067e-48	- && O80690.2 RecName: Full=Beta-glucosidase 46; Short=AtBGLU46; Flags: Precursor && PF00232:Glycosyl hydrolase family 1
MS.gene003286	POD 15	761.667	161	92.0797	21.3294	-2.10971	1.56869e-08	- && Q9LEH3.1 RecName: Full=Peroxidase 15; Short=Prx15; AltName: Full=Anionic peroxidase; Flags: Precursor && PF00141:Peroxidase
MS.gene073776	POD 21	57.3333	0	7.54392	0	-8.14682	8.78768e-09	- && Q42580.1 RecName: Full=Peroxidase 21; Short=Atperox P21; AltName: Full=ATP2a/ATP2b; AltName: Full=PRXR5; Flags: Precursor && PF00141:Peroxidase
MS.gene44482	POD 73	305	87	40.1267	12.6581	-1.66504	4.57852e-06	- && Q43873.1 RecName: Full=Peroxidase 73; Short=Atperox P73; AltName: Full=ATP10a; AltName: Full=PRXR11; Flags: Precursor && PF00141:Peroxidase
MS.gene009691	POD 4	54.6667	18.3333	7.14192	2.64935	-1.43219	0.0189261	- && A7NY33.1 RecName: Full=Peroxidase 4; Flags: Precursor && PF00141:Peroxidase
MS.gene060053	POD 55	43	1	5.71861	0.146517	-5.28696	1.03869e-06	- && Q96509.1 RecName: Full=Peroxidase 55; Short=Atperox P55; AltName: Full=ATP20a; Flags: Precursor && PF00141:Peroxidase
MS.gene24236	POD 9	7.66667	0	0.92893	0	-5.22526	0.0192364	- && Q96512.1 RecName: Full=Peroxidase 9; Short=Atperox P9; AltName: Full=ATP18a; Flags: Precursor && -
MS.gene02084	POD 15	225.667	0	27.0232	0	-10.1194	3.06439e-14	- && Q9LEH3.1 RecName: Full=Peroxidase 15; Short=Prx15; AltName: Full=Anionic peroxidase; Flags: Precursor && PF00141:Peroxidase
MS.gene28854	SPL1	510	694	146.06	219.948	0.590497	0.02038	- && Q9SMX9.2 RecName: Full=Squamosa promoter-binding-like protein 1 && -
novel.3749	SPL3	584	117	209.513	46.3581	-2.17687	9.01699e-09	- && P93015.2 RecName: Full=Squamosa promoter-binding-like protein 3 && PF03110:SBP domain
MS.gene064000	SPL6	34	77	4.91895	12.2555	1.31687	0.001029	- && Q94JW8.2 RecName: Full=Squamosa promoter-binding-like protein 6 && PF03110:SBP domain
MS.gene93246	SPL7	13	56	1.7465	8.2108	2.23517	1.63236e-05	- && Q01JD1.1 RecName: Full=Squamosa promoter-binding-like protein 7 && PF03110:SBP domain
