# Supplementary material for: Differentially expressed genes related to plant height and yield in two alfalfa cultivars based on RNA-seq
Source: PeerJ. 2022 Oct 10;10:e14096. doi: 10.7717/peerj.14096 (PMC9558622; doi:10.7717/peerj.14096)
Supplement: Supplemental Information 12 [file peerj-10-14096-s012.xlsx]

## Sheet: Sheet1
Table S10 TFs involved in stem growth and development
Gene_Id	Gene_name	AJ_count	WJ_count	AJ_fpkm	WJ_fpkm	WJvsAJ_log2FC	WJvsAJ_padj	Gene_description
novel.6887	WRKY22	0	10	0	1.70625	5.90273	0.000706096	- && O04609.1 RecName: Full=WRKY transcription factor 22; AltName: Full=WRKY DNA-binding protein 22 && PF03106:WRKY DNA -binding domain
novel.7725	TGA1	0.666667	23.6667	0.137893	5.33715	5.29855	0.00018474	- && Q39237.2 RecName: Full=Transcription factor TGA1; AltName: Full=DNA-binding protein TGA1a-like protein; AltName: Full=bZIP transcription factor 47; Short=AtbZIP47 && PF00170:bZIP transcription factor
MS.gene02035	NPR3	86.3333	23.3333	6.25857	1.87613	-1.74054	0.000162302	- && Q8L746.1 RecName: Full=Regulatory protein NPR3; AltName: Full=BTB/POZ domain-containing protein NPR3 && PF12313:NPR1/NIM1 like defence protein C terminal|PF13637:Ankyrin repeats (many copies)|PF00651:BTB/POZ domain|PF11900:Domain of unknown function
MS.gene019150	PIF4	194.667	0.333333	24.4891	0.0453734	-8.94491	1.25677e-11	- && Q8W2F3.1 RecName: Full=Transcription factor PIF4; AltName: Full=Basic helix-loop-helix protein 9; Short=AtbHLH9; Short=bHLH 9; AltName: Full=Phytochrome-interacting factor 4; AltName: Full=Short under red-light 2; AltName: Full=Transcription factor E
MS.gene005433	SCL14	35	2.33333	5.59851	0.401757	-3.7894	0.00217768	- && Q9XE58.2 RecName: Full=Scarecrow-like protein 14; Short=AtSCL14; AltName: Full=GRAS family protein 2; Short=AtGRAS-2 && PF01373:Glycosyl hydrolase family 14|PF03514:GRAS domain family
MS.gene033452	NAP11	95.6667	27.3333	11.6954	3.66955	-1.67232	0.00599906	- && Q9AT00.1 RecName: Full=Protein TRIGALACTOSYLDIACYLGLYCEROL 3, chloroplastic; AltName: Full=ABC transporter I family member 13; Short=ABC transporter ABCI.13; Short=AtABCI13; AltName: Full=Non-intrinsic ABC protein 11; Short=AtNAP11; Flags: Precursor
MS.gene043462	NAC073	273.667	1194.67	40.5359	197.575	2.28495	2.44047e-07	- && O49459.1 RecName: Full=NAC domain-containing protein 73; Short=ANAC073; AltName: Full=Protein SECONDARY WALL-ASSOCIATED NAC DOMAIN PROTEIN 2 && PF02365:No apical meristem (NAM) protein
MS.gene26389	NAC010	171.667	571	22.8176	84.1183	1.88188	2.52021e-11	- && F4HY61.1 RecName: Full=NAC domain-containing protein 10; Short=ANAC010; AltName: Full=Protein SECONDARY WALL-ASSOCIATED NAC DOMAIN PROTEIN 3 && PF02365:No apical meristem (NAM) protein
MS.gene49710	NAC081	598	89.3333	88.199	14.6443	-2.59082	6.11325e-06	- && Q9C598.1 RecName: Full=Protein ATAF2; AltName: Full=NAC domain-containing protein 81; Short=ANAC081 && PF02365:No apical meristem (NAM) protein
MS.gene27204	WRKY6	213.333	0.666667	16.2531	0.0551311	-8.17903	2.05711e-12	- && Q9C519.1 RecName: Full=WRKY transcription factor 6; AltName: Full=WRKY DNA-binding protein 6; Short=AtWRKY6 && PF03106:WRKY DNA -binding domain
MS.gene033130	NRP2	149.333	280	25.0086	51.9509	1.05437	0.0045576	&& Q8LC68.2 RecName: Full=NAP-related protein 2; AltName: Full=Nucleosome/chromatin assembly factor group A5; AltName: Full=Protein SET homolog 2 && PF00956:Nucleosome assembly protein (NAP)
MS.gene87798	WRKY33	101.667	18.3333	10.4687	2.1083	-2.31289	0.00541673	- && Q8S8P5.2 RecName: Full=Probable WRKY transcription factor 33; AltName: Full=WRKY DNA-binding protein 33 && PF03106:WRKY DNA -binding domain
MS.gene31033	WRKY51	63	2.66667	20.2588	0.960057	-4.40126	0.000564036	- && Q93WU9.1 RecName: Full=Probable WRKY transcription factor 51; AltName: Full=WRKY DNA-binding protein 51 && PF03106:WRKY DNA -binding domain
MS.gene036950	WRKY54	108.667	20	16.339	3.35206	-2.28694	0.0149439	- && Q93WU8.2 RecName: Full=Probable WRKY transcription factor 54; AltName: Full=WRKY DNA-binding protein 54 && PF03106:WRKY DNA -binding domain
MS.gene20247	MYB44	892.667	314.333	118.121	46.1849	-1.35496	0.00225245	- && Q9FDW1.1 RecName: Full=Transcription factor MYB44; AltName: Full=Myb-related protein 44; Short=AtMYB44; AltName: Full=Myb-related protein R1; Short=AtMYBR1 && PF00249:Myb-like DNA-binding domain
MS.gene32420	MYB3R1	481.667	214.667	20.7459	10.2041	-1.0238	8.37381e-05	- && Q9S7G7.1 RecName: Full=Myb-related protein 3R-1; AltName: Full=Plant c-MYB-like protein 1; Short=Protein PC-MYB1 && -
novel.6851	MYB86	74	580	3.21527	28.1462	3.12951	3.13313e-10	- && Q8LPH6.1 RecName: Full=Transcription factor MYB86; AltName: Full=Myb homolog 4; Short=AtMyb4; AltName: Full=Myb-related protein 86; Short=AtMYB86 && -
MS.gene056908	MYB46	228.333	319.333	29.0199	45.0423	0.633805	0.103348	- && Q9LXV2.1 RecName: Full=Transcription factor MYB46; AltName: Full=Myb-related protein 46; Short=AtMYB46 && PF00249:Myb-like DNA-binding domain
MS.gene31432	GLK1	227	0.666667	22.9035	0.0726802	-8.27746	1.96704e-12	- && Q9SIV3.2 RecName: Full=Transcription activator GLK1; AltName: Full=GBF'S PRO-RICH REGION-INTERACTING factor 1; AltName: Full=Golden2-like protein 1; Short=AtGLK1 && PF00249:Myb-like DNA-binding domain
MS.gene84326	MYB2	98	29	11.2515	3.64874	-1.62643	0.0227037	- && Q9SQQ9.1 RecName: Full=Myb-related protein 2; AltName: Full=Myb family transcription factor PHL9; AltName: Full=Protein NITROGEN STARVATION RESPONSE 1; Short=AtNSR1; AltName: Full=Protein PHR1-LIKE 9 && PF00249:Myb-like DNA-binding domain|PF14379:MYB
