# Supplementary material for: Differentially expressed genes related to plant height and yield in two alfalfa cultivars based on RNA-seq
Source: PeerJ. 2022 Oct 10;10:e14096. doi: 10.7717/peerj.14096 (PMC9558622; doi:10.7717/peerj.14096)
Supplement: Supplemental Information 14 [file peerj-10-14096-s014.xlsx]

## Sheet: Raw Data
	a, b, c, d and e represent five repetitions.
2019	Plant Height (cm)							Stem diameter(mm)							Length of Internode(cm)
	WL712	a	b	c	d	e		WL712	a	b	c	d	e		WL712	a	b	c	d	e
	Transplanting period	14.98	16.62	16.15	15.71	14.52		Transplanting period	1.24	1.15	1.22	1.17	1.21		Transplanting period	1.7	1.6	1.82	1.65	1.79
	Branching stage	24.6	25.26	25.2	24.96	26.14		Branching stage	2.116	2.07	2.04	2.11	2.18		Branching stage	3.47	3.65	3.55	3.38	3.41
	Budding stage	72.81	72.21	74.59	71.02	73.48		Budding stage	3.61	3.63	3.29	3.98	3.58		Budding stage	6.75	6.94	6.81	6.91	6.98
	Early flower stage	76.59	75.35	76.89	74.26	74.97		Early flower stage	3.66	3.59	3.62	3.64	3.52		Early flower stage	7.52	7.31	7.69	7.43	7.54
	Full flower stage	79.41	80.56	79.4	79.23	77.95		Full flower stage	3.81	3.78	3.82	3.85	3.72		Full flower stage	7.68	7.93	7.82	7.79	8.06
	WL525HQ	a	b	c	d	e		WL525HQ	a	b	c	d	e		WL525HQ	a	b	c	d	e
	Transplanting period	14.56	14.21	13.97	13.95	14.76		Transplanting period	1.17	1.08	1.14	1.03	1.08		Transplanting period	1.51	1.65	1.56	1.71	1.59
	Branching stage	21.2	21.98	22.6	20.37	19.96		Branching stage	1.96	1.87	1.92	1.89	1.93		Branching stage	2.61	2.79	2.72	2.64	2.68
	Budding stage	69.23	68.31	70.77	67.54	70.26		Budding stage	3.28	3.26	3.37	3.29	3.27		Budding stage	6.5	6.48	6.72	6.61	6.7
	Early flower stage	67.95	72.46	70.19	69.84	71.68		Early flower stage	3.49	3.53	3.51	3.54	3.45		Early flower stage	7.24	7.36	7.18	7.42	7.31
	Full flower stage	78.51	74.96	76.58	75.19	74.61		Full flower stage	3.64	3.59	3.67	3.62	3.57		Full flower stage	7.58	7.69	7.55	7.47	7.7
	Victoria	a	b	c	d	e		Victoria	a	b	c	d	e		Victoria	a	b	c	d	e
	Transplanting period	13.95	14.19	15.14	14.02	13.57		Transplanting period	1.06	1.01	0.95	0.99	1.03		Transplanting period	1.47	1.52	1.63	1.41	1.49
	Branching stage	20.3	19.9	20.6	21.08	19.59		Branching stage	1.58	1.6	1.57	1.63	1.61		Branching stage	2.25	2.34	2.11	2.34	2.47
	Budding stage	63.51	64.48	64.29	62.68	62.52		Budding stage	2.91	3.01	2.89	2.94	2.87		Budding stage	6.22	6.36	6.27	6.41	6.25
	Early flower stage	64.92	65.3	66.01	63.57	64.82		Early flower stage	3.01	3.02	3.07	2.98	2.95		Early flower stage	6.83	7.15	7.01	6.91	7.09
	Full flower stage	69.12	67.28	70.96	68.14	69.01		Full flower stage	3.14	3.08	3.11	3.05	3.1		Full flower stage	7.21	7.19	7.26	7.08	7.27
	Knight 2	a	b	c	d	e		Knight 2	a	b	c	d	e		Knight 2	a	b	c	d	e
	Transplanting period	12.24	13.37	11.98	12.97	12.65		Transplanting period	1.01	0.99	0.98	1.03	0.97		Transplanting period	1.31	1.25	1.17	1.06	1.23
	Branching stage	17.53	18.9	18.84	17.96	19.85		Branching stage	1.39	1.4	1.36	1.45	1.41		Branching stage	2.03	2.01	2.24	2.13	2.09
	Budding stage	41.91	42.12	42.26	41.23	41.92		Budding stage	2.02	2.09	2.04	2.06	2.03		Budding stage	4.32	4.28	4.56	4.47	4.38
	Early flower stage	43.71	40.35	43.25	40.24	42.98		Early flower stage	1.98	1.97	2.03	2.05	1.99		Early flower stage	4.38	4.59	4.54	4.47	4.51
	Full flower stage	42.19	40.69	44.2	41.63	42.88		Full flower stage	2.07	2.1	2.11	2.12	2.09		Full flower stage	4.71	4.58	4.63	4.76	4.67
	Aohan	a	b	c	d	e		Aohan	a	b	c	d	e		Aohan	a	b	c	d	e
	Transplanting period	12.07	13.15	11.24	12.98	13.19		Transplanting period	0.99	0.94	1.05	1.02	0.99		Transplanting period	1.18	1.26	1.15	1.14	1.25
	Branching stage	16.3	15.8	16.2	14.97	17.34		Branching stage	1.29	1.32	1.28	1.32	1.31		Branching stage	1.83	2.02	1.86	1.89	1.91
	Budding stage	41.02	40.88	41.62	40.51	41.07		Budding stage	1.88	2.01	1.82	1.91	1.89		Budding stage	4.21	4.35	4.28	4.19	4.39
	Early flower stage	41.2	40.02	43.35	41.67	39.98		Early flower stage	1.92	1.96	1.87	1.93	1.89		Early flower stage	4.35	4.33	4.42	4.39	4.41
	Full flower stage	42.1	42.03	40.9	40.56	41.51		Full flower stage	2.04	2.01	2.04	1.98	1.95		Full flower stage	4.57	4.72	4.61	4.53	4.55
Budding stage
	Plant Height(cm)
				2019					2020
	WL712	72.81	72.21	74.59	71.02	73.48	79.62	79.45	79.32	79.7	78.98
	WL525HQ	69.23	68.31	70.77	67.54	70.26	75.61	74.98	77.65	74.92	75.06
	Victoria	63.51	64.48	64.29	62.68	62.52	66.85	68.95	68.73	67.32	69.57
	Knight 2	41.91	42.12	42.26	41.23	41.92	42.35	42.84	41.61	42.43	42.26
	Aohan	41.02	40.88	41.62	40.51	41.07	41.36	42.16	42.31	41.07	41.12
	Stem diameter(mm)
				2019					2020
		a	b	c	d	e	a	b	c	d	e
	WL712	3.61	3.63	3.29	3.98	3.58	3.82	3.84	3.82	3.79	3.87
	WL525HQ	3.28	3.26	3.37	3.29	3.27	3.61	3.62	3.69	3.58	3.52
	Victoria	2.91	3.01	2.89	2.94	2.87	3.52	3.91	3.48	3.26	3.48
	Knight 2	2.02	2.09	2.04	2.06	2.03	2.16	2.12	2.09	2.28	2.13
	Aohan	1.88	2.01	1.82	1.91	1.89	2.06	2.03	1.98	1.99	1.95
2020	Length of Internode(cm)
		a	b	c	d	e
	WL712	7.91	7.81	7.95	7.89	7.79
	WL525HQ	7.63	7.59	8.09	7.11	7.52
	Victoria	7.19	7.18	7.35	7.05	7.11
	Knight 2	4.68	4.59	4.62	4.71	4.66
	Aohan	4.59	4.85	4.61	4.39	4.57
	Number of lateral Internode
		a	b	c	d	e
	WL712	15	14	16	14	15
	WL525HQ	13	11	13	12	13
	Victoria	13	14	11	14	13
	Knight 2	9	8	9	11	9
	Aohan	7	7	8	6	7
	Number of branches
		a	b	c	d	e
	WL712	45	41	42	43	42
	WL525HQ	40	39	40	43	41
	Victoria	59	54	58	55	56
	Knight 2	60	61	57	58	59
	Aohan	58	60	56	57	58
	Leaf area(mm2)
		a	b	c	d	e
	WL712	289.1	295.4	291.6	282.1	287.5
	WL525HQ	268.4	271.5	255.3	261.4	275.2
	Victoria	263.8	270.4	259.3	266.7	268.4
	Knight 2	175.9	168.3	170.7	165.8	162.8
	Aohan	159.7	169.8	164.3	166.9	171.5
	Fresh Weight(g/plant)
		a	b	c	d	e
	WL712	280.4	281.9	281.2	278.6	279.8
	WL525HQ	256.8	254.1	263	271.5	257.4
	Victoria	256.3	243.9	261.7	253.8	264.7
	Knight 2	154.8	160.8	151.3	156.4	149.3
	Aohan	150.7	142.5	152.1	149.7	155.3
	Leaf to stem ratio(%)
		a	b	c	d	e
	WL712	1.06	1.09	0.97	0.99	1.04
	WL525HQ	0.99	1.05	0.98	1.02	1.07
	Victoria	1.09	0.97	0.99	1.02	1.04
	Knight 2	0.93	0.91	0.99	0.96	0.98
	Aohan	0.97	0.9	1.04	0.95	1.01
	Dry weight(g/plant)
		a	b	c	d	e
	WL712	67.3	68.5	66.3	67.4	66.9
	WL525HQ	63.5	61.3	62.9	61.6	62.9
	Victoria	61.1	62.3	61.3	60.7	61.9
	Knight 2	34.9	36.9	34.3	35.6	36.4
	Aohan	34.1	33.8	36.1	34.2	35.4

## Sheet: Pearson correlation Data
	Plant Height(cm)
			WL712	WL525HQ	Victoria	Knight2	Aohan
			79.62	75.61	66.85	42.35	41.36
			79.45	74.98	68.95	42.84	42.16
			79.32	77.65	68.73	41.61	42.31
			79.7	74.92	67.32	42.43	41.07
			78.98	75.06	69.57	42.26	41.12
	Stem diameter(mm)
			WL712	WL525HQ	Victoria	Knight2	Aohan
			3.82	3.61	3.52	2.16	2.06
			3.84	3.62	3.91	2.12	2.03
			3.82	3.69	3.48	2.09	1.98
			3.79	3.58	3.26	2.28	1.99
			3.87	3.52	3.48	2.13	1.95
	Length of Internode(cm)
			WL712	WL525HQ	Victoria	Knight2	Aohan
			7.91	7.63	7.19	4.68	4.59
			7.81	7.6	7.18	4.59	4.85
			7.95	8.1	7.35	4.62	4.61
			7.89	7.1	7.05	4.71	4.39
			7.79	7.52	7.11	4.66	4.57
	Number of lateral Internode
			WL712	WL525HQ	Victoria	Knight2	Aohan
			15	12.7	12.9	9.3	7
			14	11	13.5	8.2	6.9
			16	13.2	10.9	9.1	7.9
			14	12.1	14.3	10.6	6.3
			15	12.9	12.9	9.3	7.03333
	Number of branches
			WL712	WL525HQ	Victoria	Knight2	Aohan
			45	40	59	60	58
			41	39	54	61	60
			42	40	58	57	56
			43	43	55	58	57
			42	41	56	59	58
	Fresh Weight(g/plant)
			WL712	WL525HQ	Victoria	Knight2	Aohan
			280.4	256.8	256.3	154.8	150.7
			281.9	254.1	243.9	160.8	142.5
			281.2	263	261.7	151.3	152.1
			278.6	271.5	253.8	156.4	149.7
			279.8	257.4	264.7	149.3	155.3
	Leaf to stem ratio(%)
			WL712	WL525HQ	Victoria	Knight2	Aohan
			1.06	0.99	1.09	0.93	0.97
			1.09	1.05	0.97	0.91	0.9
			0.97	0.98	0.99	0.99	1.04
			0.99	1.02	1.02	0.96	0.95
			1.04	1.07	1.04	0.98	1.01
	Dry weight(g/plant)
			WL712	WL525HQ	Victoria	Knight2	Aohan
			67.3	63.5	61.1	34.9	34.1
			68.5	61.3	62.3	36.9	33.8
			66.3	62.9	61.3	34.3	36.1
			67.4	61.6	60.7	35.6	34.2
			66.9	62.9	61.9	36.4	35.4
