# Supplementary material for: Differentially expressed genes related to plant height and yield in two alfalfa cultivars based on RNA-seq
Source: PeerJ. 2022 Oct 10;10:e14096. doi: 10.7717/peerj.14096 (PMC9558622; doi:10.7717/peerj.14096)
Supplement: Supplemental Information 16 [file peerj-10-14096-s016.xlsx]

## Sheet: Plant Height
	Plant Height: cm
		a	b	c	d	e
	WL712	50.21	48.71	49.83	50.95	51.1
	Aohan	28.35	29.61	29.16	28.97	27.54

## Sheet: Plant Weight
	Plant Weight: g/plant
		a	b	c	d	e
	WL712	231.2	229.8	227.4	233.5	232.8
	Aohan	141.2	140.9	141.6	140.5	141.1

## Sheet: Lenght of Internodde
	Lenght of Internodde: cm
		a	b	c	d	e
	WL712	5.16	5.01	5.09	5.2	5.26
	Aohan	2.91	3.03	2.96	2.94	2.84

## Sheet: Stem Diameter
	Stem Diameter: mm
		a	b	c	d	e
	WL712	2.53	2.49	2.51	2.55	2.52
	Aohan	1.16	1.2	1.19	1.17	1.23

## Sheet: Leaf Areas
	Leaf Areas: mm2
		a	b	c	d	e
	WL712	160.2	159.7	159.3	158.6	159.1
	Aohan	125.3	126.7	131.4	124.5	128.9
