# Supplementary material for: Differentially expressed genes related to plant height and yield in two alfalfa cultivars based on RNA-seq
Source: PeerJ. 2022 Oct 10;10:e14096. doi: 10.7717/peerj.14096 (PMC9558622; doi:10.7717/peerj.14096)
Supplement: Supplemental Information 17 [file peerj-10-14096-s017.xlsx]

## Sheet: Plant Height
	August, 2019								Mid-October, 2019
			a	b	c	d	e				a	b	c	d	e
		WL 712	72.81	72.21	74.59	71.02	73.48			WL 712	50.29	49.84	50.11	49.98	50.64
		WL525HQ	69.23	68.31	70.77	67.54	70.26			WL525HQ	49.34	50.05	49.85	49.37	49.66
	Plant Height (cm)	Victoria	63.51	64.48	64.29	62.68	62.52		Plant Height (cm)	Victoria	48.58	49.93	48.22	48.59	50.68
		Knight 2	41.91	42.12	42.26	41.23	41.92			Knight 2	28.39	27.31	28.19	28.04	28.91
		Aohan	41.02	40.88	41.62	40.51	41.07			Aohan	28.16	28.33	28.06	28.48	28.11
	June, 2020								August, 2020
			a	b	c	d	e				a	b	c	d	e
		WL 712	82.03	81.34	80.09	82.35	80.59			WL 712	79.62	79.45	79.32	79.7	78.98
		WL525HQ	77.58	78.95	76.12	79.69	78.69			WL525HQ	75.61	74.98	77.65	74.92	75.06
	Plant Height (cm)	Victoria	68.25	69.31	70.16	70.23	68.92		Plant Height (cm)	Victoria	66.85	68.95	68.73	67.32	69.57
		Knight 2	43.95	43.26	42.78	42.92	43.16			Knight 2	42.35	42.84	41.61	42.43	42.26
		Aohan	42.69	43.19	43.01	42.27	42.09			Aohan	41.36	42.16	42.31	41.07	41.12
	August, 2019								Mid-October, 2019
			a	b	c	d	e				a	b	c	d	e
		WL 712	263.9	266.4	264.8	262.6	255.1			WL 712	235.1	236.9	233.8	235.7	236.5
		WL525HQ	257.4	251.6	261.1	265.4	258.1			WL525HQ	235.6	231.2	229.9	230.5	234.6
	Plant Weight (g)	Victoria	255.6	260.6	256.2	261.9	259.8		Plant Weight (g)	Victoria	231.9	235.8	230.4	231.6	230.6
		Knight 2	153.5	151.8	152.4	155.2	150.2			Knight 2	128.3	128.6	127.9	128.1	129.7
		Aohan	150.1	147.2	150.6	148.8	149.4			Aohan	128.3	127.1	126.2	127.9	127.6
	June, 2020								August, 2020
			a	b	c	d	e				a	b	c	d	e
		WL 712	329.5	326.7	329.1	330.8	328.9			WL 712	280.4	281.9	281.2	278.6	279.8
		WL525HQ	323.8	324.6	325.2	321.9	331.6			WL525HQ	266.8	264.1	263	271.5	267.4
	Plant Weight (g)	Victoria	329.4	335.1	327.5	331.4	332.6		Plant Weight (g)	Victoria	266.3	263.9	261.7	263.8	264.7
		Knight 2	211.6	212.1	210.9	213.2	212.8			Knight 2	154.8	150.8	151.3	156.4	149.3
		Aohan	213.2	212.5	210.4	208.7	214.1			Aohan	150.7	152.5	152.1	149.7	155.3
	August, 2019								Mid-October, 2019
			a	b	c	d	e				a	b	c	d	e
		WL 712	7.51	7.49	7.46	7.5	7.48			WL 712	5.44	5.42	5.44516	5.42	5.40753
		WL525HQ	7.48	7.49	7.47	7.48	7.46			WL525HQ	5.28	5.24737	5.27	5.29	5.26
	Lenght of Internodde (cm)	Victoria	7.51	7.49	7.48	7.52	7.5		Lenght of Internodde (cm)	Victoria	5.23	5.24	5.25	5.27	5.21
		Knight 2	4.41263	4.34	4.41158	4.43368	4.44842			Knight 2	2.95158	2.96737	3.04316	2.87474	2.98842
		Aohan	4.32316	4.26421	4.31789	4.30316	4.38105			Aohan	2.99789	2.95368	2.95895	2.98211	2.96421
	June, 2020								August, 2020
			a	b	c	d	e				a	b	c	d	e
		WL 712	8.16	8.21	8.13	8.07	8.09			WL 712	7.91	7.81	7.95	7.89	7.79
		WL525HQ	8.16632	8.06	8.01263	8.06	7.98			WL525HQ	7.63	7.59	8.09	7.11	7.52
	Lenght of Internodde (cm)	Victoria	7.18421	7.29579	7.38526	7.39263	7.25474		Lenght of Internodde (cm)	Victoria	7.19	7.18	7.35	7.05	7.11
		Knight 2	4.57813	4.50625	4.45625	4.47083	4.49583			Knight 2	4.68	4.59	4.62	4.71	4.66
		Aohan	4.59032	4.64409	4.62473	4.54516	4.53			Aohan	4.59	4.85	4.61	4.39	4.57
	August, 2019								Mid-October, 2019
			a	b	c	d	e				a	b	c	d	e
		WL 712	3.61	3.63	3.29	3.98	3.58			WL 712	2.61	2.68	2.59	2.64	2.63
		WL525HQ	3.58	3.26	3.57	3.69	3.87			WL525HQ	2.63	2.59	2.62	2.61	2.64
	Stem Diameter (mm)	Victoria	3.49	3.56	3.41	3.39	3.48		Stem Diameter (mm)	Victoria	2.59	2.57	2.61	2.63	2.61
		Knight 2	2.02	2.09	2.04	2.06	2.03			Knight 2	1.29	1.18	1.29	1.26	1.23
		Aohan	1.88	2.01	1.82	1.91	1.89			Aohan	1.25	1.28	1.16	1.14	1.23
	June, 2020								August, 2020
			a	b	c	d	e				a	b	c	d	e
		WL 712	3.89	3.85	3.82	3.84	3.86			WL 712	3.82	3.84	3.82	3.79	3.87
		WL525HQ	3.62	3.64	3.6	3.62	3.64			WL525HQ	3.61	3.62	3.69	3.58	3.52
	Stem Diameter (mm)	Victoria	3.69	3.51	3.68	3.66	3.56		Stem Diameter (mm)	Victoria	3.52	3.91	3.48	3.26	3.48
		Knight 2	2.26	2.31	2.29	2.3	2.26			Knight 2	2.16	2.12	2.09	2.28	2.13
		Aohan	2.29	2.31	2.26	2.29	2.24			Aohan	2.06	2.03	1.98	1.99	1.95

## Sheet: Sheet1
			WL 712	WL525HQ	Victoria	Knight 2	Aohan
	Plant Height (cm)	August, 2019	72.82 ± 1.3398 a	69.22 ± 1.3355 b	63.50 ± 0.8968 c	41.89 ± 0.3958 d	41.02 ± 0.4007 d
		Mid-October, 2019	50.17 ± 0.3098 a	49.65 ± 0.3060 ab	49.20 ± 1.0536 b	28.17 ± 0.5816 c	28.23 ± 0.1737 c
		June, 2020	81.28 ± 0.9491 a	78.21 ± 1.3904 b	69.37 ± 0.8403 c	43.21 ± 0.4532 d	42.09 ± 0.4693 d
		August, 2020	79.41 ± 0.2840 a	75.64 ± 1.1545 b	68.28 ± 1.1491 c	42.30 ± 0.4440 d	41.60 ±0.5888 d
	Plant Weight (g)	August, 2019	262.6 ± 4.3935 a	258.7 ± 5.0771 a	258.8 ± 2.7770 a	152.6 ± 1.8714 b	149.2 ± 1.3198 b
		Mid-October, 2019	235.6 ± 1.2247 a	232.4 ± 2.5677 b	232.1 ± 2.1859 b	128.5 ± 0.7085 c	127.4 ± 0.8106 c
		June, 2020	329.0 ± 1.4832 a	325.4 ± 3.6718 a	331.2 ± 2.9215 b	212.1 ± 0.9203 c	211.8 ± 2.1970 c
		August, 2020	280.4 ± 1.4832 a	266.6 ± 3.3126 b	264.1 ± 1.6649 b	152.5 ± 2.9609 c	152.1 ± 2.1279 c
	Lenght of Internodde (cm)	August, 2019	7.49 ± 0.0192 a	7.48 ± 0.0114 a	7.50 ± 0.0158 a	4.41 ± 0.0417 b	4.32 ± 0.0422 c
		Mid-October, 2019	5.43 ± 0.0156 a	5.27 ± 0.0167 b	5.24 ± 0.0224 b	2.97 ± 0.0612 c	2.97 ± 0.0183 c
		June, 2020	8.13 ± 0.0559 a	8.05 ± 0.0705 a	7.31 ± 0.0884 b	4.50 ± 0.0472 c	4.53 ± 0.0505 c
		August, 2020	7.87 ± 0.0678 a	7.59 ± 0.3489 b	7.18 ± 0.1126 c	4.65 ± 0.0476 d	4.60 ± 0.1641 d
	Stem Diameter (mm)	August, 2019	3.62 ± 0.2451 a	3.60 ± 0.2223 a	3.47 ± 0.0680 a	2.05 ± 0.0277 b	1.90 ± 0.0691 b
		Mid-October, 2019	2.63 ± 0.0339 a	2.62 ± 0.0192 a	2.60 ± 0.0228 a	1.25 ± 0.0464 b	1.21 ± 0.0597 b
		June, 2020	3.85 ± 0.0259 a	3.62 ± 0.0167 b	3.62 ± 0.0803 b	2.28 ± 0.0230 c	2.27 ± 0.0277 c
		August, 2020	3.83 ± 0.0295 a	3.60 ± 0.0619 b	3.53 ± 0.2356 b	2.16 ± 0.0737 c	2.00 ± 0.0432 c
