# Supplementary material for: Differentially expressed genes related to plant height and yield in two alfalfa cultivars based on RNA-seq
Source: PeerJ. 2022 Oct 10;10:e14096. doi: 10.7717/peerj.14096 (PMC9558622; doi:10.7717/peerj.14096)
Supplement: Supplemental Information 18 [file peerj-10-14096-s018.xlsx]

## Sheet: available nitrogen
			Sample weight	V1	V2	V3	Vaverage	V0	V(average-0)	nitrogen content(mg/Kg)
		a	2.0008	1.53	1.51	1.55	1.53	0.2	1.33	93.0628
		b	2.0009	1.53	1.49	1.53	1.51667	0.2	1.32	92.3584
		c	2.0007	1.5	1.52	1.52	1.51333	0.2	1.32	92.3677
		d	2.0008	1.5	1.52	1.53	1.51667	0.2	1.32	92.3631
		e	2.0008	1.52	1.53	1.53	1.52667	0.2	1.33	93.0628
		f	2.0009	1.52	1.53	1.52	1.52333	0.2	1.32	92.3584
		g	2.0008	1.53	1.52	1.54	1.53	0.2	1.33	93.0628
		h	2.0007	1.51	1.51	1.53	1.51667	0.2	1.32	92.3677
		i	2.0009	1.52	1.54	1.51	1.52333	0.2	1.32	92.3584
						a,b,c,d,e,f,g,h,and i represent nine samples.
						V1,V2, and V3 represent three technical repetitions.

## Sheet: available phosphorus
			Sample weight	V1	V2	V3	Vaverage	ρ:mg/Kg	available phosphorus:mg/Kg
		a	2.5003	0.46	0.43	0.41	0.433333	1.66641	33.3282
		b	2.5005	0.43	0.42	0.46	0.436667	1.67918	33.5837
		c	2.5003	0.41	0.45	0.43	0.43	1.65364	33.0728
		d	2.5001	0.45	0.42	0.43	0.433333	1.66641	33.3282
		e	2.5001	0.41	0.43	0.41	0.416667	1.60255	32.0511
		f	2.5003	0.46	0.42	0.44	0.44	1.69195	33.8391
		g	2.5001	0.41	0.44	0.43	0.426667	1.64087	32.8174
		h	2.5002	0.43	0.45	0.42	0.433333	1.66641	33.3282
		i	2.5004	0.43	0.45	0.43	0.436667	1.67918	33.5837
							a,b,c,d,e,f,g,h,and i represent nine samples.
							V1,V2, and V3 represent three technical repetitions.
				a	b	c	均值
			1号	0.039	0.04	0.037	0.0386667
			2号	0.062	0.063	0.062	0.0623333
			3号	0.124	0.125	0.124	0.124333
			4号	0.197	0.197	0.197	0.197
			5号	0.26	0.259	0.26	0.259667
		ρ	0	0.15	0.25	0.5	0.75	1
		OD	0	0.0386667	0.0623333	0.124333	0.197	0.259667

## Sheet: available potassium
			Sample weight	V1	V2	V3	Vaverage	ρ:mg/Kg	available potassium:mg/Kg
		a	5.0009	534	536	531	533.667	16.763	167.6
		b	5.0012	541	536	537	538	16.8991	168.951
		c	5.0008	541	534	538	537.667	16.8886	168.859
		d	5.0004	534	528	541	534.333	16.7839	167.826
		e	5.0006	540	537	543	540	16.9619	169.599
		f	5.0004	536	531	537	534.667	16.7944	167.931
		g	5.0007	539	537	541	539	16.9305	169.281
		h	5.0002	535	540	538	537.667	16.8886	168.88
		i	5.0001	529	535	539	534.333	16.7839	167.836
			ρ	0	6	12	18	24	30
			OD	0	235	426	596	754	923

## Sheet: organic matteret
			Sample weight	V1	V2	V3	Vaverage	Organic carbon:g/Kg	organic matter:g/Kg
		a	1.0005	0.085	0.091	0.092	0.0893333	5.67538	12.9089
		b	1.0007	0.093	0.082	0.085	0.0866667	5.50109	12.51
		c	1.0002	0.094	0.086	0.087	0.089	5.65359	12.8632
		d	1.0001	0.092	0.086	0.093	0.0903333	5.74074	13.0628
		e	1.0005	0.089	0.092	0.085	0.0886667	5.63181	12.8098
		f	1.0003	0.086	0.084	0.092	0.0873333	5.54466	12.6141
		g	1.0001	0.091	0.087	0.092	0.09	5.71895	13.0132
		h	1.0002	0.088	0.086	0.092	0.0886667	5.63181	12.8136
		i	1.0004	0.089	0.093	0.091	0.091	5.78431	13.158
							a,b,c,d,e,f,g,h,and i represent nine samples.
							V1,V2, and V3 represent three technical repetitions.
		Organic carbon concentration	0	2.5	5	7.5	10	12.5	15
		OD	0	0.0376667	0.0893333	0.114	0.154667	0.192333	0.231667

## Sheet: pH
			V1	V2	V3	Vaverage
		a	7.26	7.25	7.26	7.25667
		b	7.25	7.24	7.25	7.24667
		c	7.26	7.27	7.28	7.27
		d	7.24	7.26	7.29	7.26333
		e	7.28	7.25	7.26	7.26333
		f	7.21	7.26	7.25	7.24
		g	7.26	7.28	7.28	7.27333
		h	7.24	7.25	7.21	7.23333
		i	7.26	7.25	7.26	7.25667
